# Supplementary material
Source: PubMed Central journal article supplement (PMC2630884)
Supplement: NIHMS86541-supplement-1_si_001.pdf [file NIHMS86541-supplement-1_si_001.pdf]

## **Supporting information**

### **How the Arming Participating Moieties can Broaden the Scope of Chemoselective Oligosaccharide Synthesis by Allowing the Inverse Armed-Disarmed Approach**

*James T. Smoot and Alexei V. Demchenko*

Department of Chemistry and Biochemistry, University of Missouri – St. Louis, One  
University Boulevard, St. Louis, Missouri 63121, USA; E-mail: demchenkoa@umsl.edu

#### **Content:**

|                                    |     |
|------------------------------------|-----|
| General                            | S2  |
| Additional experimental procedures | S3  |
| Copies of NMR spectra              | S9  |
| References                         | S80 |

**General.** Column chromatography was performed on silica gel 60 (70-230 mesh), reactions were monitored by TLC on Kieselgel 60 F<sub>254</sub>. The compounds were detected by examination under UV light and by charring with 10% sulfuric acid in methanol. Solvents were removed under reduced pressure at < 40 °C. CH<sub>2</sub>Cl<sub>2</sub>, ClCH<sub>2</sub>CH<sub>2</sub>Cl, CH<sub>3</sub>CN, toluene were distilled from CaH<sub>2</sub> directly prior to application. Methanol was dried by refluxing with magnesium methoxide, distilled and stored under argon. Pyridine was dried by refluxing with CaH<sub>2</sub> and then distilled and stored over molecular sieves (3 Å). 1,4-Dioxane and acetone were dried and stored over molecular sieves 3 Å and K<sub>2</sub>CO<sub>3</sub>, respectively. Anhydrous DMF was used as is. Molecular sieves (3 Å or 4 Å), used for reactions, were crushed and activated *in vacuo* at 390 °C during 8 h in the first instance and then for 2-3 h at 390 °C directly prior to application. AgOTf was co-evaporated with toluene (3 x 10 mL) and dried *in vacuo* for 2-3 h directly prior to application. Cu(OTf)<sub>2</sub> was dried *in vacuo* during 2-3 h prior to application. Optical rotations were measured at 'Jasco P-1020' polarimeter. Unless noted otherwise, <sup>1</sup>H-n.m.r. spectra were recorded in CDCl<sub>3</sub> at 300 or 500 MHz, <sup>13</sup>C-NMR spectra were recorded in CDCl<sub>3</sub> at 75 or 125 MHz.

### Additional experimental procedures

**3,4,6-Tri-*O*-benzyl-1,2-*O*-(1-thioethyl)ethylidene- $\alpha$ -D-glucopyranose (2a).** To a stirred solution of 3,4,6-tri-*O*-acetyl-1,2-*O*-(1-thioethyl)ethylidene- $\alpha$ -D-glucopyranose<sup>1,2</sup> (**1a**, 3.0 g, 7.65 mmol) in methanol (25 mL) NaOMe (41 mg, 0.765 mmol) was added and the reaction mixture was stirred under argon for 1 h at rt. The volatiles were then evaporated off, the residue was co-evaporated with dry CH<sub>2</sub>Cl<sub>2</sub> (3 x 10 mL) and dried *in vacuo*. The resulting solid was dissolved in dry DMF (18 mL) and benzyl bromide (4.6 mL, 38.2 mmol) was added. The resulting solution was added dropwise to a stirred solution of NaH (60 % in mineral oil, 1.84 g, 45.9 mmol) in DMF (25 mL) at -30 °C over 15 min. The stirred reaction mixture was then allowed to warm to rt over 16 h. Upon completion, the reaction was poured on crushed ice (5 g) and stirred until cessation of H<sub>2</sub> evolution. The mixture was then extracted with ethyl acetate/diethyl ether (1/1, v/v, 3 x 50 mL) and the combined organic layer was washed with water (3 x 40 mL). The organic phase was separated, dried with MgSO<sub>4</sub>, and concentrated *in vacuo*. The residue was purified by column chromatography on silica gel (ethyl acetate /toluene gradient elution) to afford the title compound as colorless syrup (3.65 g, 89%). Analytical data for **2a**: R<sub>f</sub> = 0.44 (ethyl acetate-hexane, 1/4, v/v); [ $\alpha$ ]<sub>D</sub><sup>24</sup> = +17.6 (c = 1, CHCl<sub>3</sub>); <sup>1</sup>H-n.m.r.:  $\delta$ , 1.26 (t, 3H, SCH<sub>2</sub>CH<sub>3</sub>), 1.88 (s, 3H, CCH<sub>3</sub>), 2.58 (q, 2H, SCH<sub>2</sub>CH<sub>3</sub>), 3.60 (m, 2H, H-6a, 6b), 3.67 (dd, 1H, J<sub>4,5</sub> = 9.4 Hz, H-4), 3.78 (m, 1H, H-5), 3.88 (dd, 1H, J<sub>3,4</sub> = 3.1 Hz, H-3), 4.28-4.68 (m, 7H, J<sub>2,3</sub> = 3.1 Hz, H-2, 3 x CH<sub>2</sub>Ph), 5.74 (d, 1H, J<sub>1,2</sub> = 5.4 Hz, H-1), 7.10-7.34 (m, 15H, aromatic) ppm; <sup>13</sup>C-n.m.r.:  $\delta$ , 15.4, 25.1, 28.1, 69.3, 70.3, 7.0, 72.7, 73.6, 74.8, 75.3, 77.2, 98.4, 115.9, 127.8, 128.0, 128.1, 128.1, 128.2, 128.2, 128.2, 128.2, 128.2, 128.2, 128.5, 128.5, 128.6, 128.6,

128.7, 128.7, 137.8, 138.0, 138.3 ppm; HR-FAB MS  $[M+H]^+$  calcd for  $C_{31}H_{37}O_6S$  537.2311, found 537.2317.

**Ethyl 2-*O*-acetyl-3,4,6-tri-*O*-benzyl-1-thio- $\beta$ -D-glucopyranoside (3).** A mixture of **2a** (5.64 g, 8.87 mmol), mercaptoethanol (0.644 mL, 8.868 mmol), and freshly activated molecular sieves (4Å, 6.1 g) in  $CH_2Cl_2$  (200 mL) was stirred under argon for 45 min at rt. TMSOTf (0.154 mL, 0.8868 mmol) was added and the reaction mixture was stirred for 1.5 h at rt. Upon completion, the reaction was quenched with  $Et_3N$  (0.5 mL), solid was filtered off and the filtrate was diluted with  $CH_2Cl_2$  (200 mL) and washed water (2 x 100 mL). The organic layer was separated, dried with  $MgSO_4$ , filtered and concentrated in *vacuo*. The residue was purified by column chromatography on silica gel (ethyl acetate-toluene gradient elution) to afford the title compound as white solids (4.9 g, 87%). The spectroscopic and analytical data for **3** were in good agreement with those reported previously.<sup>1</sup>

**Ethyl 3,4,6-tri-*O*-benzyl-1-thio- $\beta$ -D-glucopyranoside (4).** To a solution of **3** (4.65 g, 8.68 mmol) in dry methanol (200 mL), NaOMe (240 mg, 4.34 mmol) was added. The reaction mixture was stirred for 40 h at rt. The reaction was then neutralized with Dowex ( $H^+$ ), filtered, and concentrated in *vacuo*. The residue was purified by column chromatography on silica gel (ethyl acetate-hexane gradient elution) to yield the title compound as colorless syrup (3.67 g, 86%). The spectroscopic and analytical data for **4** were in good agreement with those reported previously.<sup>1</sup>

**Thiazolinyl 2-O-acetyl-3,4,6-tri-O-benzyl-1-thio-β-D-glucopyranoside (14a).** A mixture of **2a** (7.50 g, 14.1 mmol), 2-mercaptothiazoline (13.44 g, 0.113 mol), and freshly activated molecular sieves (4Å, 8.25 g) in CH<sub>2</sub>Cl<sub>2</sub> (200 mL) was stirred under argon for 45 min at rt. TMSOTf (0.63 mL, 3.52 mmol) was added and the reaction mixture was stirred for 2 h at rt. Upon completion, the reaction was quenched with Et<sub>3</sub>N (2 mL), solid was filtered off and the filtrate was washed with 1 % aq. NaOH (3 x 80 mL) and water (3 x 50 mL). The organic layer was separated, dried with MgSO<sub>4</sub>, filtered and concentrated in *vacuo*. The residue was purified by column chromatography on silica gel (ethyl acetate-toluene gradient elution) to afford the title compound as white amorphous solid (7.54 g, 90%). Analytical data for **14a**: R<sub>f</sub> = 0.23 (ethyl acetate-hexane, 3/7, v/v); [α]<sub>D</sub><sup>24</sup> = +24.0° (c = 1, CHCl<sub>3</sub>); <sup>1</sup>H-n.m.r.: δ, 1.95 (s, 3H, COCH<sub>3</sub>), 3.34 (t, 2H, CH<sub>2</sub>S), 3.58 (m, 1H, H-5), 3.67-3.82 (m, 4H, H-3, 4, 6a, 6b), 4.18 (m, 2H, CH<sub>2</sub>N), 4.50-4.84 (m, 6H, CH<sub>2</sub>Ph), 5.12 (dd, 1H, J<sub>2,3</sub> = 8.7 Hz, H-2), 5.31 (d, 1H, J<sub>1,2</sub> = 10.4 Hz, H-1), 7.12-7.36 (m, 15H, aromatic) ppm; <sup>13</sup>C-n.m.r.: δ, 21.1, 35.3, 64.4, 68.6, 71.6, 73.6, 75.3, 75.5, 77.7, 79.9, 83.5, 84.5, 127.8, 128.0, 128.0, 128.1, 128.5, 128.6, 128.6, 138.1, 138.3, 138.3, 163.7, 169.8 ppm; HR-FAB MS [M+H]<sup>+</sup> calcd for C<sub>32</sub>H<sub>36</sub>NO<sub>6</sub>S<sub>2</sub> 594.1984, found 594.1991.

**Thiazolinyl 3,4,6-tri-O-benzyl-1-thio-β-D-glucopyranoside (15a).** A solution of NaOMe in MeOH (0.1 M, 11.1 mL, 1.11 mmol of MeONa) was added to a stirred suspension of **14a** (6.65 g, 11.1 mmol) in dry methanol (185 mL) and the reaction mixture was stirred for 40 h at rt. The reaction was then neutralized with Dowex (H<sup>+</sup>), filtered, and concentrated in *vacuo*. The residue **15a** was purified by column chromatography on silica gel (ethyl acetate-hexane gradient elution) to yield the title compound as colorless syrup (5.87 g, 95%). Analytical data for **15a**: R<sub>f</sub> = 0.38 (ethyl acetate/hexane, 1/1, v/v); [α]<sub>D</sub><sup>24</sup> = +18.4 (c = 1, CHCl<sub>3</sub>); <sup>1</sup>H-n.m.r.: δ, 3.31 (t, 2H, SCH<sub>2</sub>),

3.49-3.75 (m, 6H, H-2, 3, 4, 5, 6a, 6b), 4.14 (m, 2H, CH<sub>2</sub>N), 4.45-4.94 (m, 6H, CH<sub>2</sub>Ph), 5.13 (d, 1H, J<sub>1,2</sub> = 9.5 Hz, H-1), 7.09-7.33 (m, 15H, aromatic) ppm; <sup>13</sup>C-n.m.r.: δ, 35.7, 64.1, 68.8, 73.7, 75.0, 75.2, 75.6, 77.1, 80.1, 85.6, 86.7, 127.8, 128.0, 128.1, 128.1, 128.2, 128.5, 128.6, 128.7, 138.3, 138.3, 138.8, 165.5 ppm; HR-FAB MS [M+H]<sup>+</sup> calcd for C<sub>30</sub>H<sub>34</sub>NO<sub>5</sub>S<sub>2</sub> 552.1878, found 552.1871.

**3,4,6-Tri-*O*-benzyl-2-*O*-picolyl- $\alpha/\beta$ -D-glucopyranose (30).** To a suspension of the **8** or **16a** (0.171 mmol) in wet CH<sub>2</sub>Cl<sub>2</sub> (0.75 mL) the promoter was added: DMTST (0.359 mmol for **8**) or Cu(OTf)<sub>2</sub> (0.428 mmol for **16a**) and the reaction mixture was stirred for 20 h at 42 °C. The reaction was quenched with TEA, stirred for 30 min, and then diluted with CH<sub>2</sub>Cl<sub>2</sub>. The solid was filtered-off and the residue was washed with CH<sub>2</sub>Cl<sub>2</sub>. The combined filtrate (30 mL) was washed with water (4 x 10 mL), the organic phase was separated, dried with MgSO<sub>4</sub> and concentrated *in vacuo*. The residue was purified by column chromatography on silica gel (ethyl acetate-hexane gradient elution) to yield the title compound as colorless syrup (81-85%,  $\alpha/\beta$  = 4/1). Analytical data for  $\alpha$ -**30**: R<sub>f</sub> = 0.10 (ethyl acetate-hexane, 35/65, v/v); <sup>1</sup>H-n.m.r.: δ, 3.38-3.51 (m, 1H, H-4), 3.54-3.68 (m, 4H, H-2, 3, 5, 6a), 4.02 (dd, 1H, H-6b), 4.37-4.57 (m, 4H, CH<sub>2</sub>Ph), 4.76-5.05 (m, 4H, CH<sub>2</sub>Ph), 5.35 (d, 1H, J<sub>1,2</sub> = 3.3 Hz, H-1), 6.95-7.30 (m, 17H, aromatic), 7.57 (m, 1H, aromatic), 8.52 (d, 1H, aromatic) ppm; <sup>13</sup>C-n.m.r.: δ, 68.9, 69.1, 70.4, 72.9, 73.5, 73.6, 73.7, 75.1, 75.1, 75.8, 78.5, 81.5, 81.9, 84.2, 85.7, 90.8, 97.2, 121.6, 122.1, 122.9, 122.9, 127.7, 127.7, 127.8, 127.9, 128.0, 128.1, 128.1, 128.5, 128.6, 137.3, 137.5, 138.2, 138.3, 138.3, 138.5, 138.8, 139.1, 148.5, 149.0, 158.0 ppm; HR-FAB MS calc for C<sub>33</sub>H<sub>35</sub>NO<sub>6</sub>Na [M+Na]<sup>+</sup>: 564.2362, found 564.2357.

**Thiazolinyll 3,4-di-O-benzoyl-2-O-benzyl-6-O-trityl-1-thio-β-D-glucopyranoside (37a).** A solution of NaOMe in MeOH (0.1 M, 11.1 mL, 1.11 mmol of MeONa) was added to a stirred suspension of thiazolinyll 3,4,6-tri-O-acetyl-2-O-benzyl-1-thio-β-D-glucopyranoside (**37**)<sup>3</sup> (338 mg, 0.68 mmol) in dry methanol (10 mL) and the reaction mixture was stirred for 2 h at rt. The reaction was then neutralized with Dowex (H<sup>+</sup>), filtered, and concentrated in vacuo. The crude residue containing thiazolinyll 2-O-benzyl-1-thio-β-D-glucopyranoside (250 mg, 0.68 mmol) was dissolved in pyridine (5.0 mL) and TrCl (380 mg, 1.360 mmol) was added. The reaction mixture was stirred under an atmosphere of argon for 40 h at rt, cooled to 0 °C BzCl (320 μL, 2.72 mmol) was added. The reaction mixture was stirred for 16 h at rt. Upon completion, the reaction was quenched with methanol (1.0 mL), the volatiles were evaporated off, the residue was dissolved in CH<sub>2</sub>Cl<sub>2</sub> (15mL) and washed successively with water (15 mL) sat. NaHCO<sub>3</sub> (15 mL), water (15 mL), 1N HCl (15 mL) and water (3 x 15 mL). The organic phase was separated, dried and concentrated in vacuo. The residue was purified by column chromatography on silica gel (EtOAc/hexane gradient elution) to afford the title compound as off-white foam in 98% yield. Analytical data for **37a**: R<sub>f</sub> = 0.40 (ethyl acetate-hexane, 3/7, v/v); [α]<sub>D</sub><sup>24</sup> = +13.4° (c = 1, CHCl<sub>3</sub>); <sup>1</sup>H-n.m.r.: δ, 3.36 (m, 2H, H-6a, 6b), 3.27 (t, 2H, J<sub>CH<sub>2</sub>CH<sub>2</sub>N</sub> = 8.0, SCH<sub>2</sub>CH<sub>2</sub>), 3.71-3.91 (m, 2H, H-2, 5), 4.11- 4.19 (m, 2H, CH<sub>2</sub>N), 4.52 (d, 1H, CH<sub>2</sub>Ph), 4.70 (d, 1H, CH<sub>2</sub>Ph), 5.34-5.41 (m, 2H, CH<sub>2</sub>Ph), 5.61 (dd, 1H, J<sub>3,4</sub> = 9.1, H-3), 7.03-7.35 (m, 26H, aromatic), 7.60 (dd, 2H, aromatic), 7.82 (dd, 2H, aromatic) ppm; <sup>13</sup>C-n.m.r.; δ, 35.1, 53.6, 63.2, 64.5, 69.5, 75.3, 76.3, 77.4, 78.3, 78.6, 84.7, 86.9, 127.0, 127.9, 128.1, 128.4, 128.5, 128.5, 128.6, 128.8, 128.9, 129.3, 129.6, 129.9, 130.0, 133.0, 133.2, 133.3, 137.1, 143.9, 165.2, 165.8 ppm; HR-FAB MS calc for C<sub>49</sub>H<sub>43</sub>NO<sub>7</sub>S<sub>2</sub>Na [M+Na]<sup>+</sup>: 844.2379 found 844.2375.

**Thiazolinyl 2-O-benzyl-2,3-di-O-benzoyl-1-thio- $\beta$ -D-glucopyranoside (38).** To a stirred solution of **37a** (82 mg, 0.0997 mmol) in wet CH<sub>2</sub>Cl<sub>2</sub> (2 mL), water (50  $\mu$ L) and 10% TFA/CH<sub>2</sub>Cl<sub>2</sub> (1/9, v/v, 10  $\mu$ L) were added at rt. The reaction mixture was stirred for 30 min, then diluted with CH<sub>2</sub>Cl<sub>2</sub> (15mL) and washed with water (15 mL), sat. NaHCO<sub>3</sub> (15 mL), and water (2 x 15 mL). The organic phase was separated, dried and concentrated in vacuo. The residue was purified by column chromatography on silica gel (EtOAc/toluene gradient elution) to afford the title compound as white amorphous solid in 80% yield. Analytical data for **38**: R<sub>f</sub> = 0.17 (ethyl acetate-hexane, 2/3, v/v); [ $\alpha$ ]<sub>D</sub><sup>24</sup> = +19.4° (c = 1, CHCl<sub>3</sub>); <sup>1</sup>H-n.m.r:  $\delta$ , 2.88 (bs, 1H, OH), 3.49 (t, 2H, J<sub>CH<sub>2</sub>CH<sub>2</sub>N</sub> = 7.6, SCH<sub>2</sub>CH<sub>2</sub>), 3.78 (dd, 1H, J = 4.9, H-6a), 3.90-4.01 (m, 3H, H-2, 5, 6a), 4.17-4.46 (m, 2H, CH<sub>2</sub>N), 4.67 (d, 1H, CH<sub>2</sub>Ph), 4.85 (d, 1H, CH<sub>2</sub>Ph), 5.49 (dd, 1H, J = 9.7, H-4), 5.60 (d, 1H, J<sub>1,2</sub> = 10.0, H-1), 5.92 (dd, 1H, J<sub>2,3</sub> = 9.2 Hz, H-3), 7.19-7.24 (m, 5H, aromatic), 7.42-7.48 (m, 4H, aromatic), 7.60 (t, 2H, aromatic), 8.02 (t, 4H, aromatic) ppm; <sup>13</sup>C-n.m.r.;  $\delta$ , 28.2, 35.4, 50.9, 61.1, 61.7, 64.5, 69.5, 72.9, 75.1, 75.3, 75.8, 77.4, 78.4, 79.0, 83.7, 84.7, 128.2, 128.3, 128.5, 127.6, 128.7, 128.8, 128.8, 129.5, 129.9, 130.1, 130.2, 133.4, 133.6, 133.8, 134.0, 136.9, 137.3, 163.2, 165.7, 166.2; FAB MS [M+Na]<sup>+</sup> HR-FAB MS calc for C<sub>30</sub>H<sub>29</sub>NO<sub>7</sub>S<sub>2</sub>Na: 602.1283 found 602.1270.



## Copies of NMR spectra

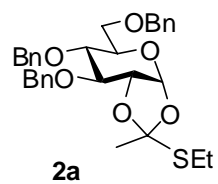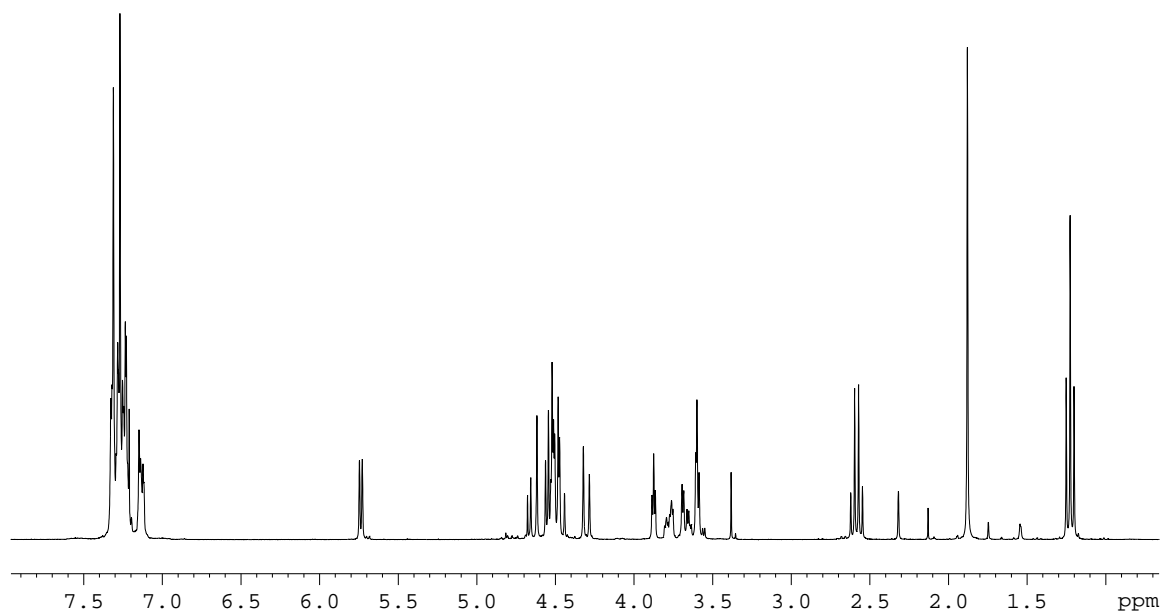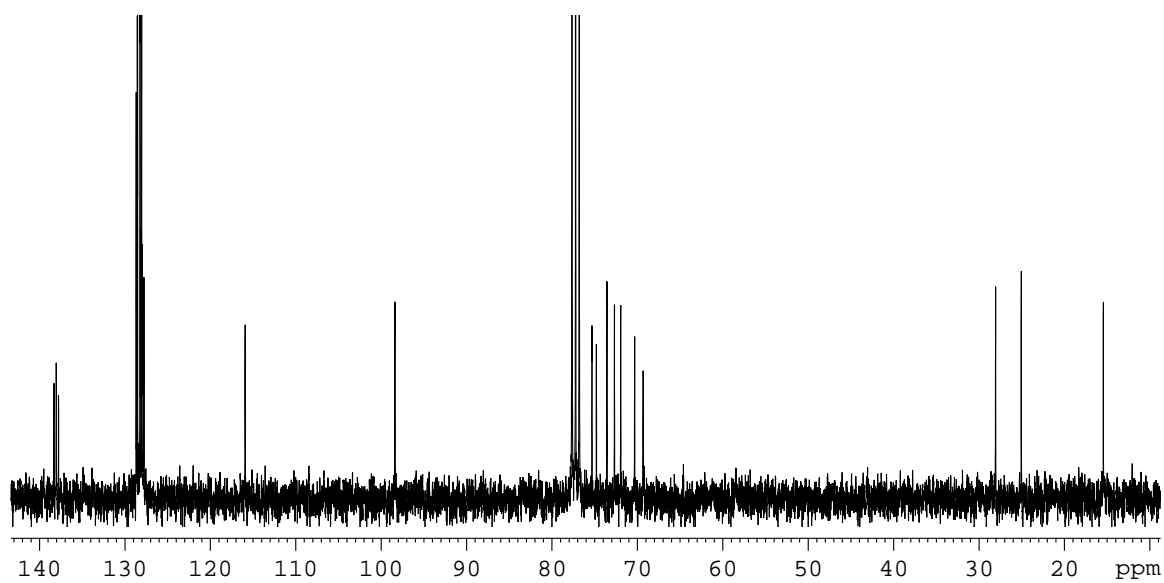

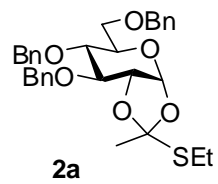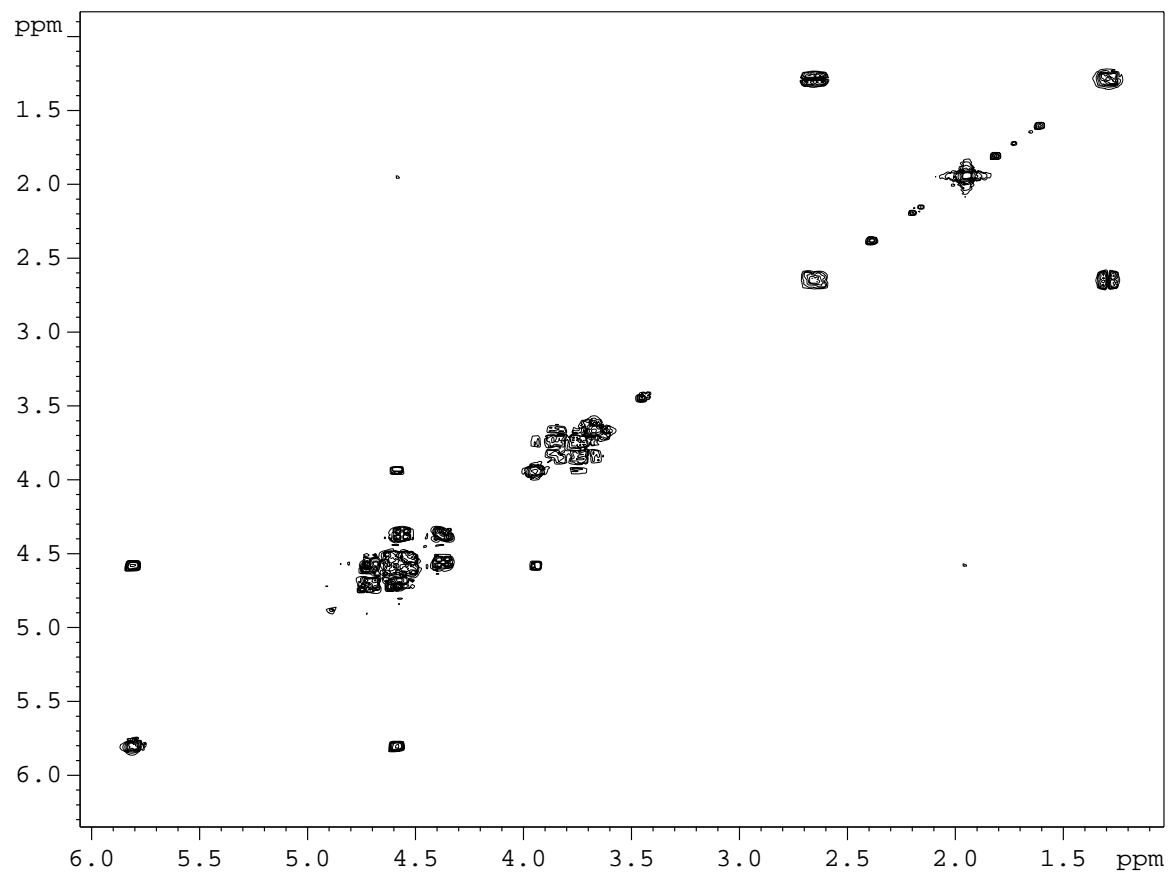

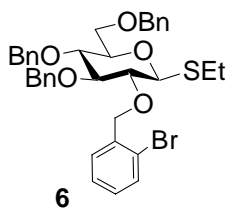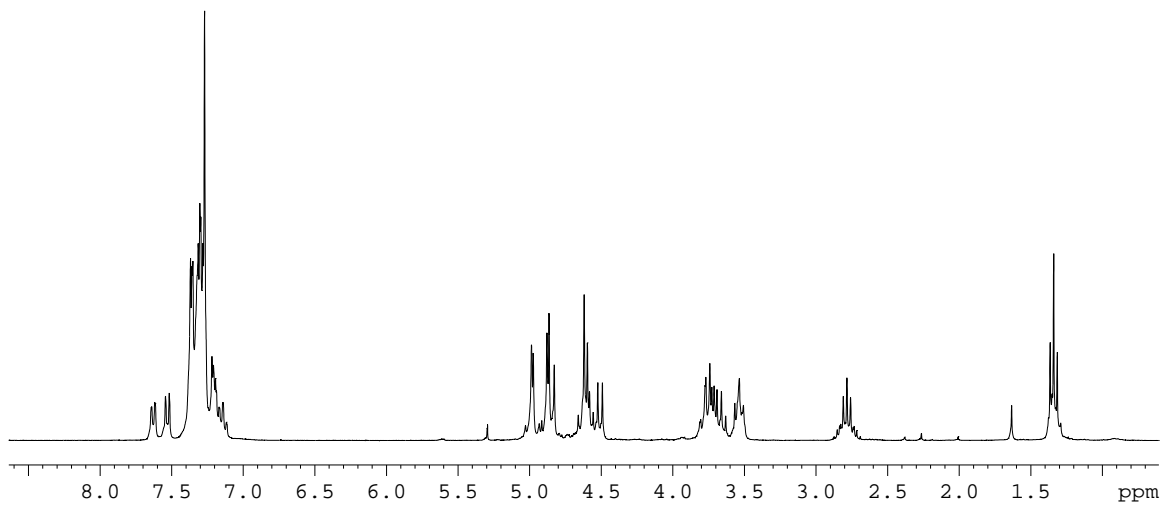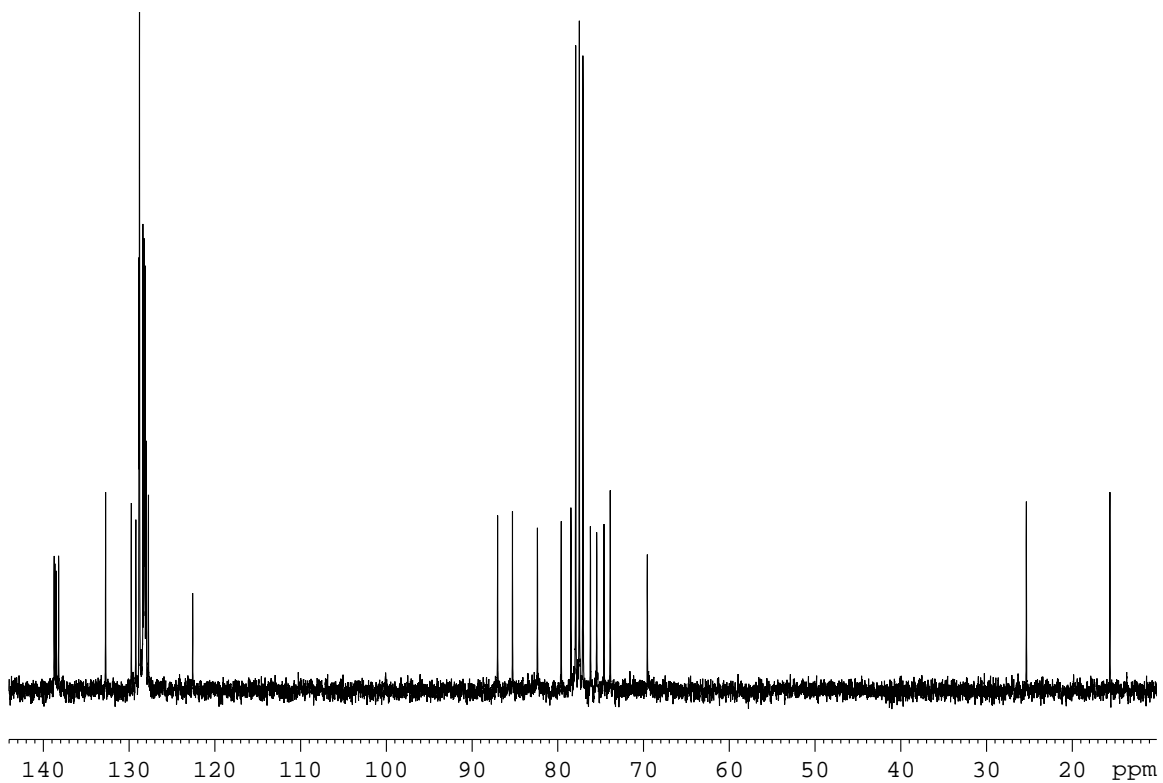

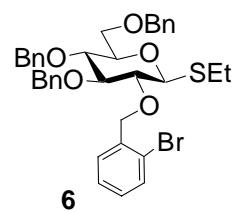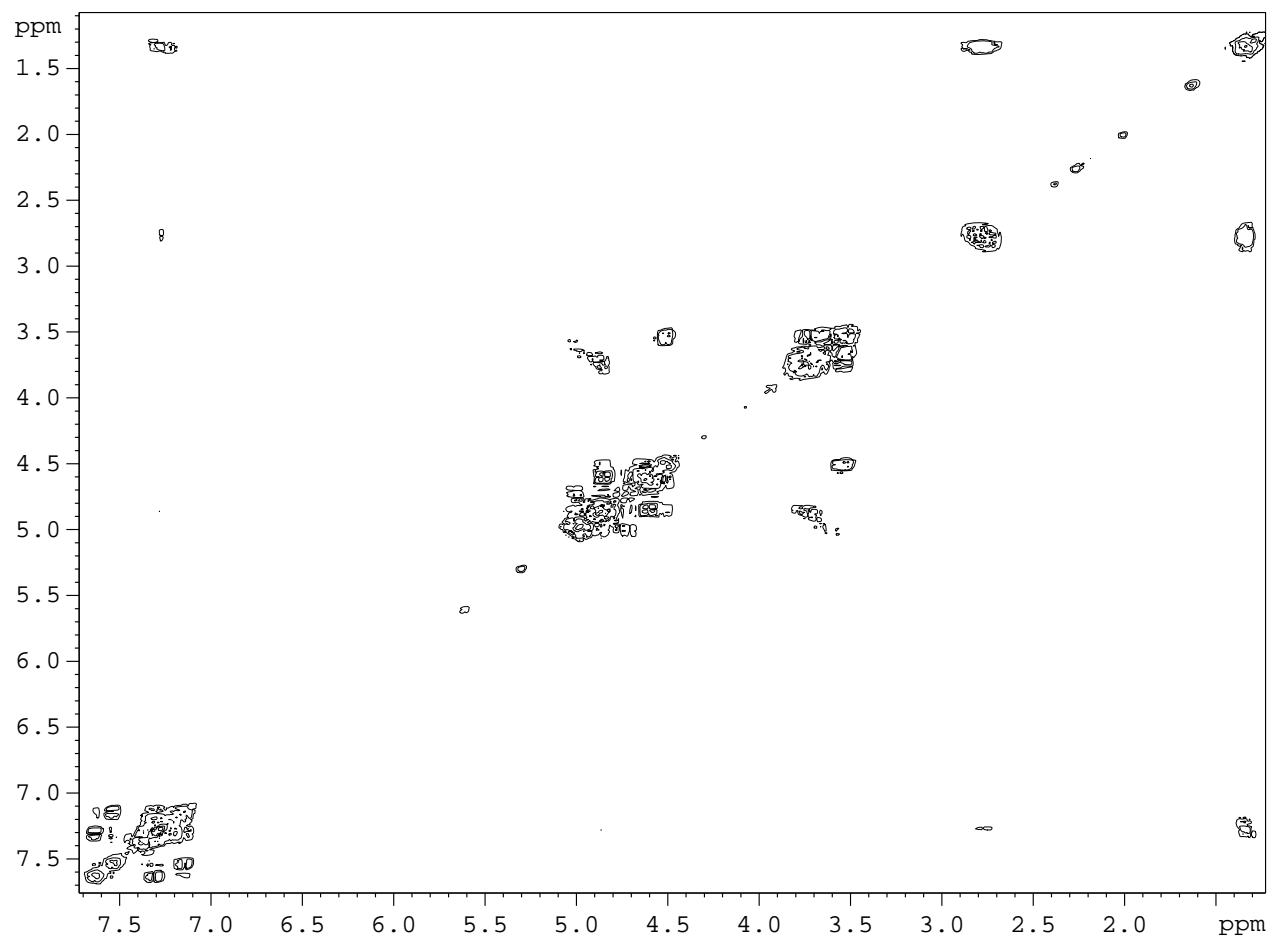

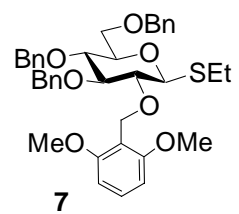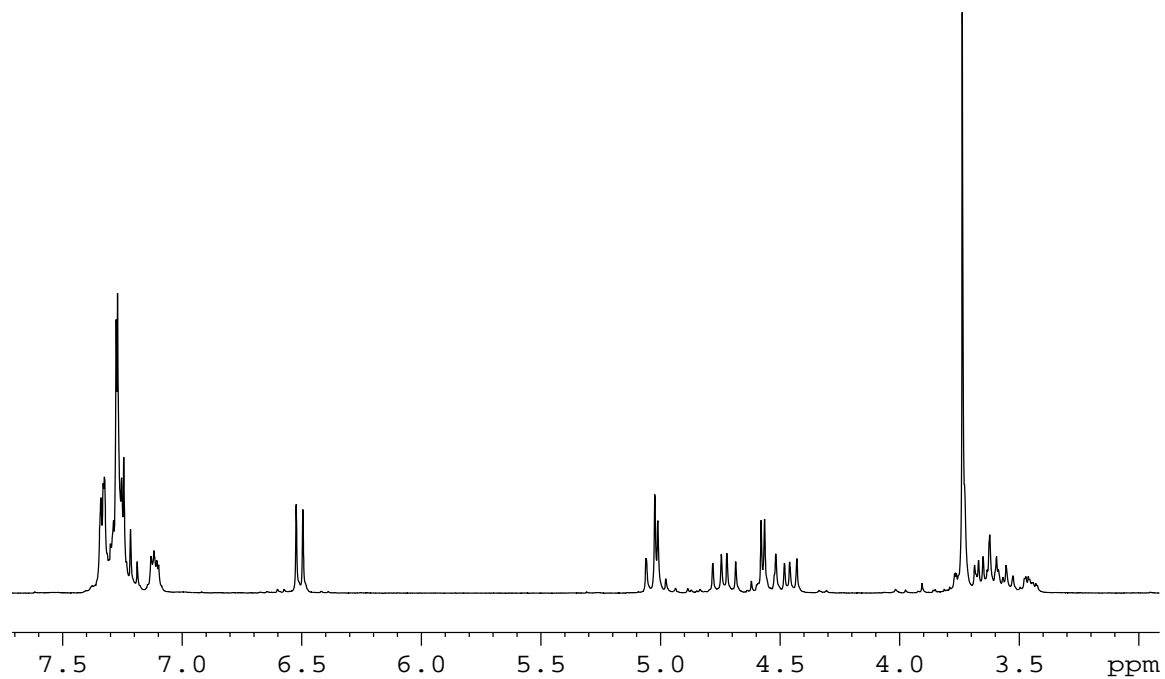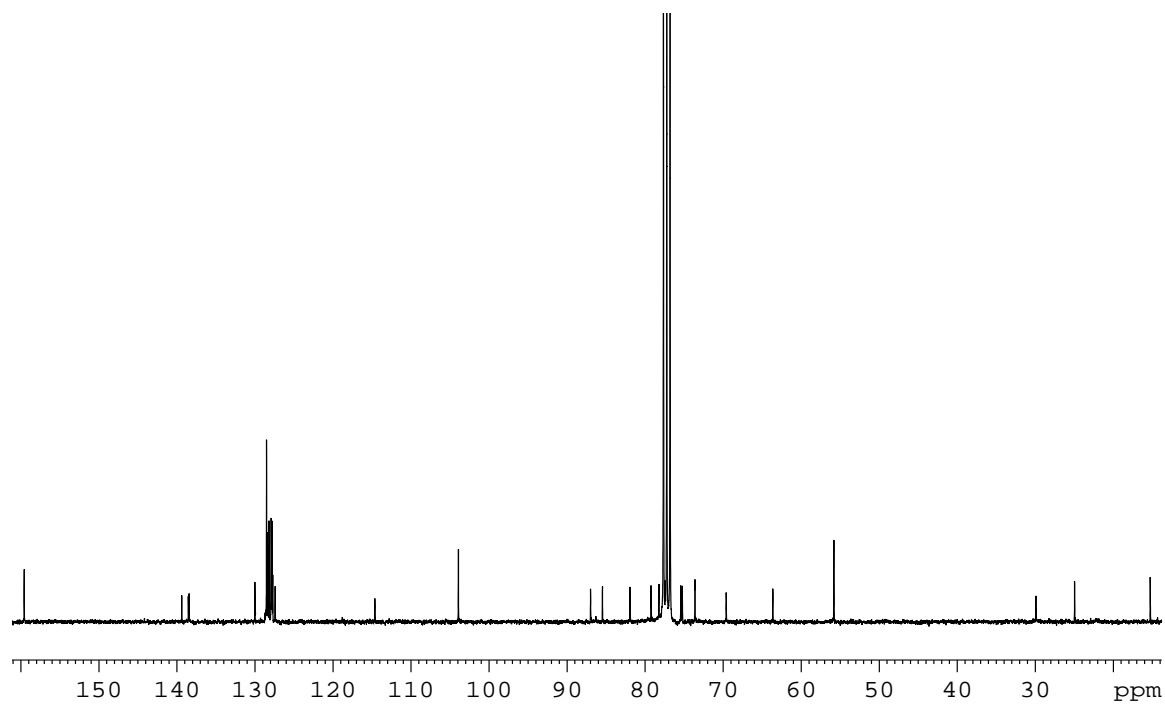

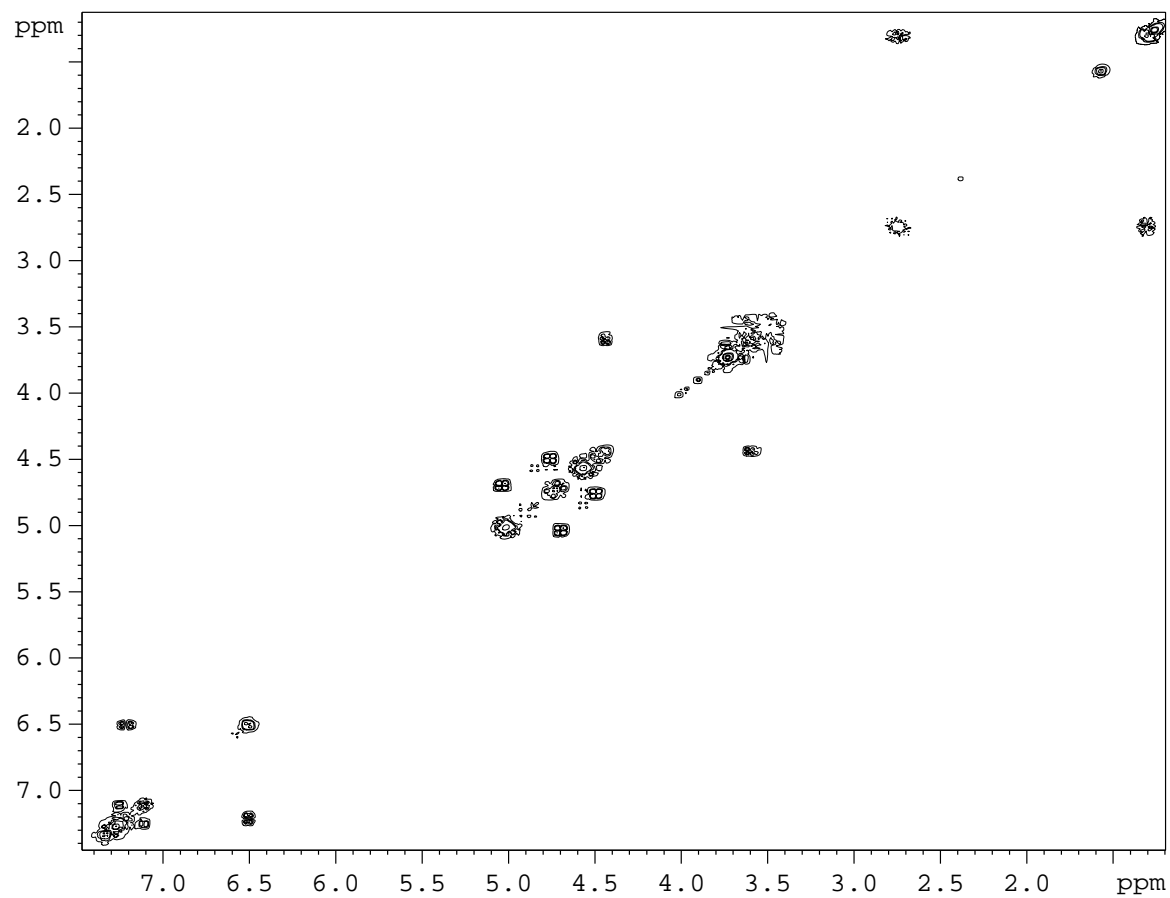

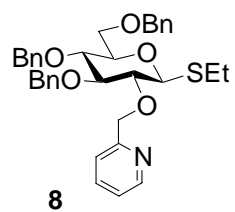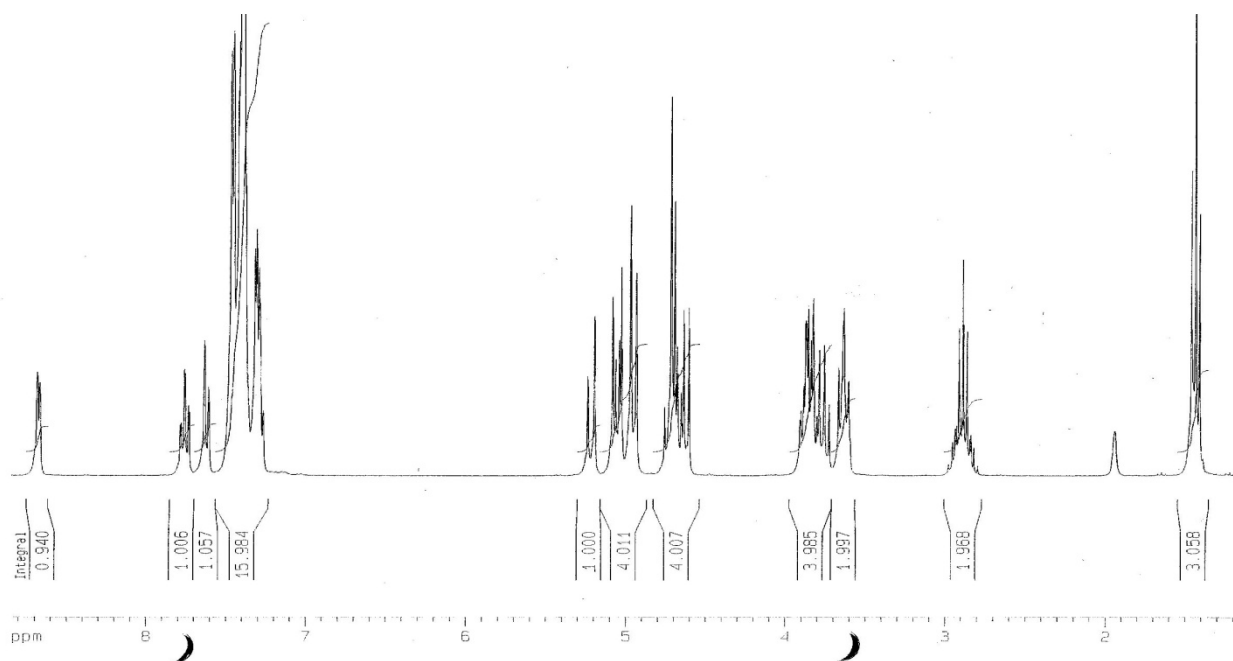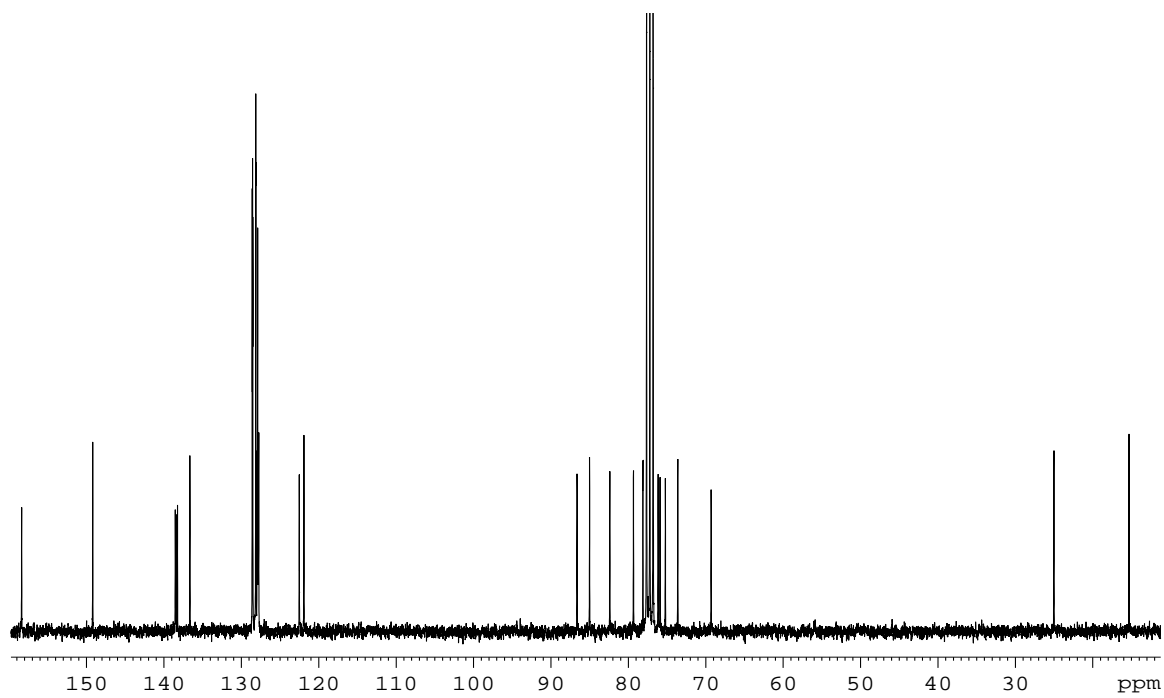

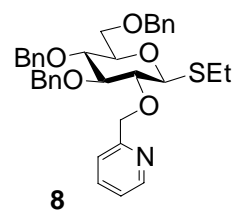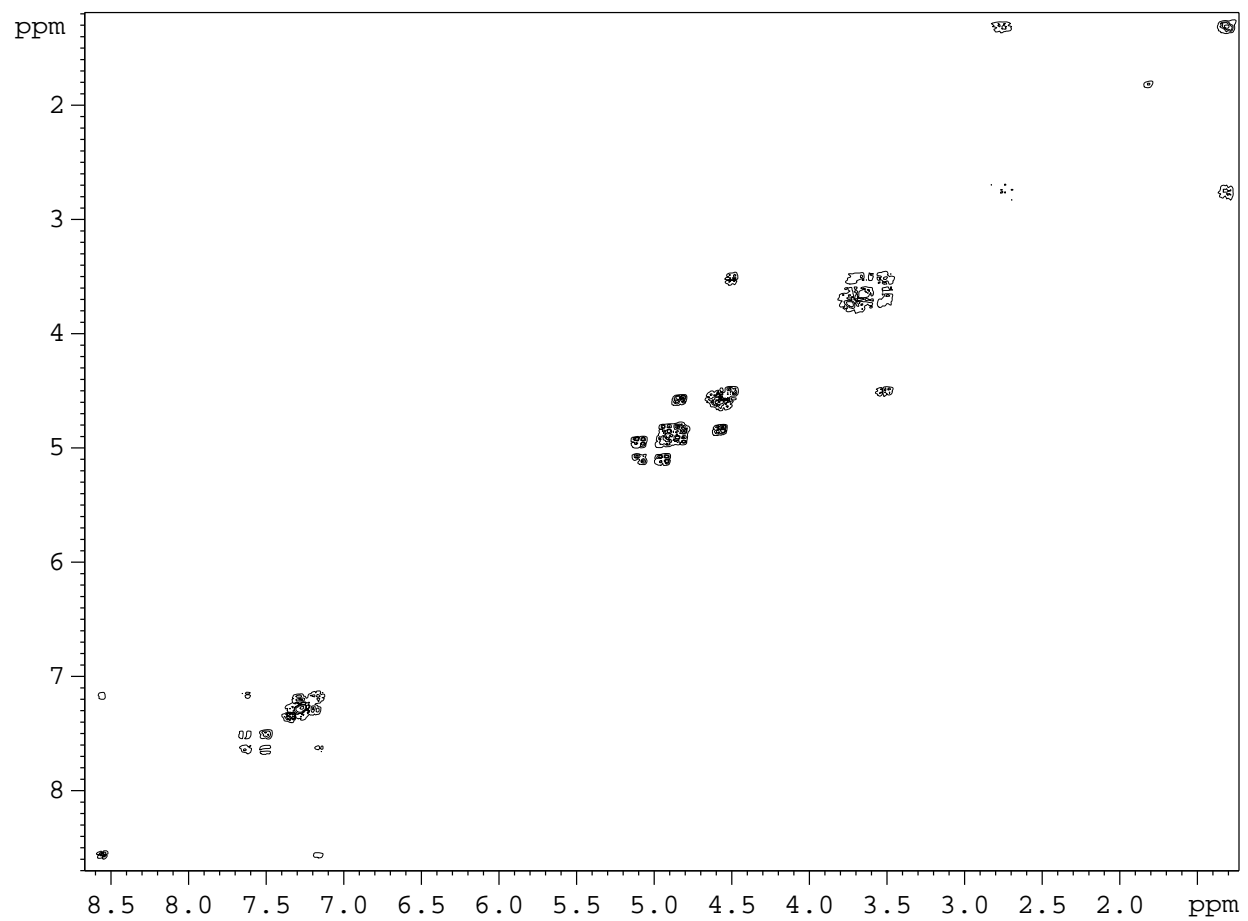



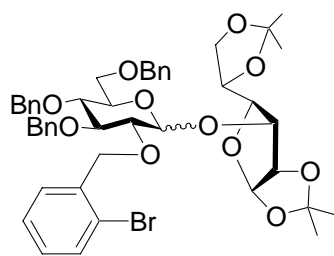

11

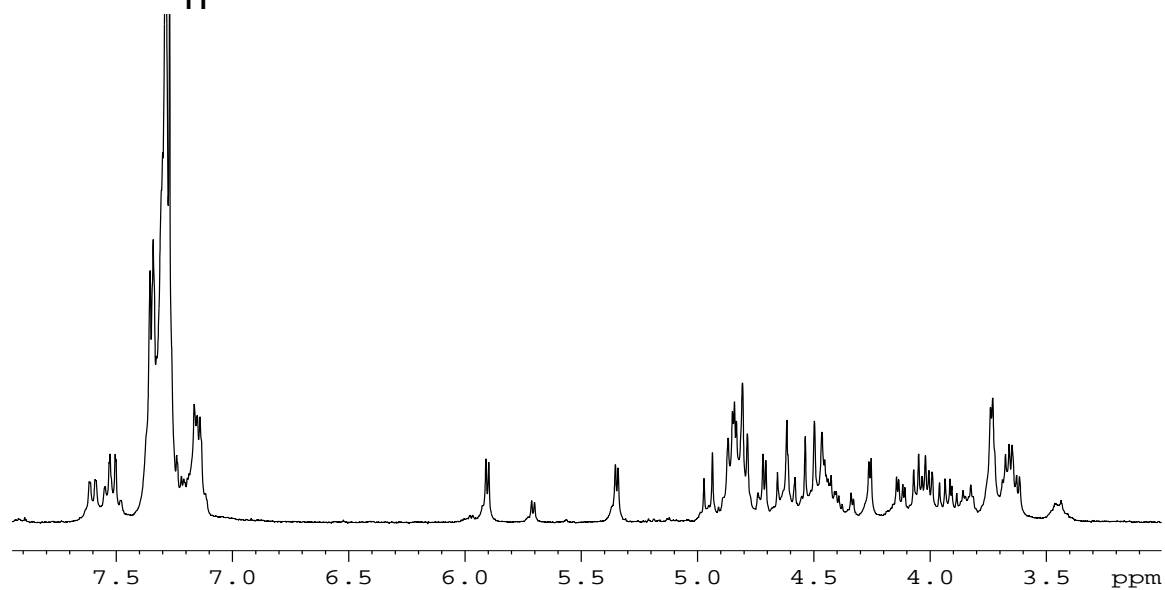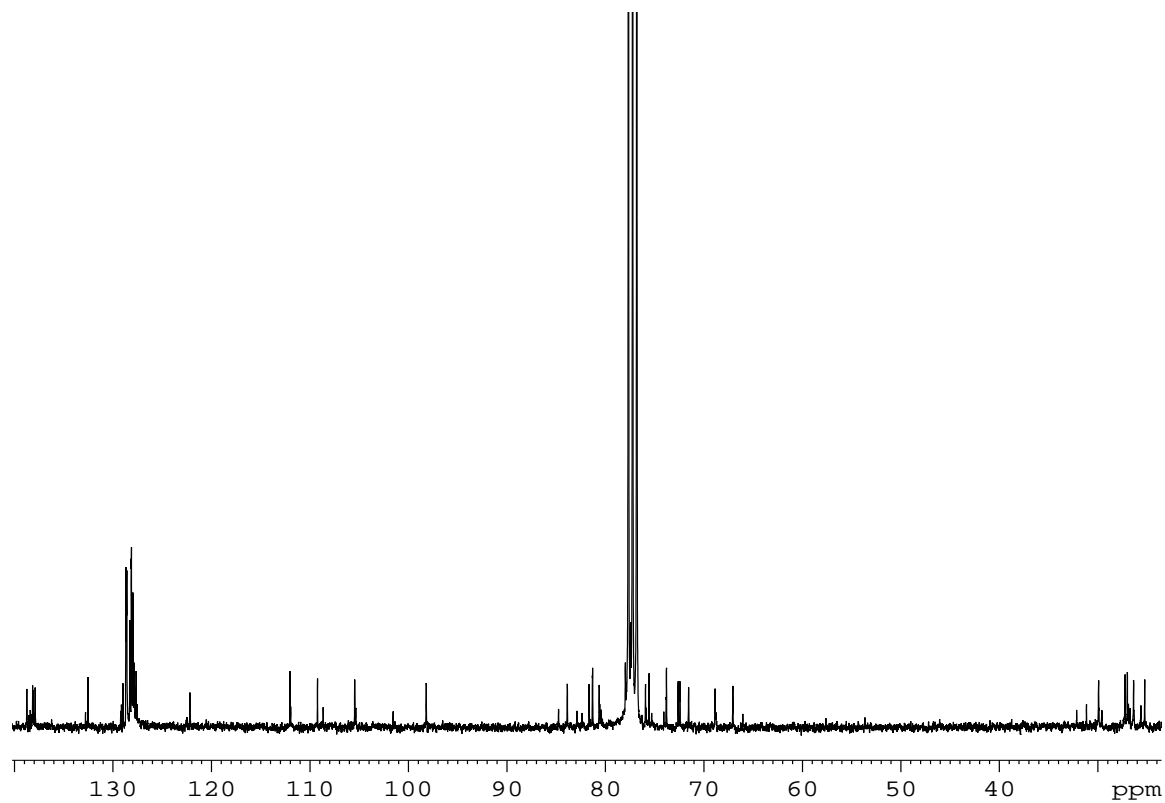

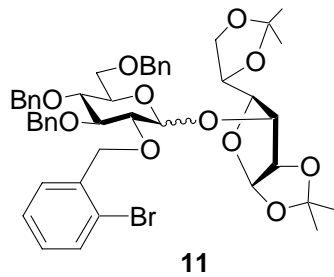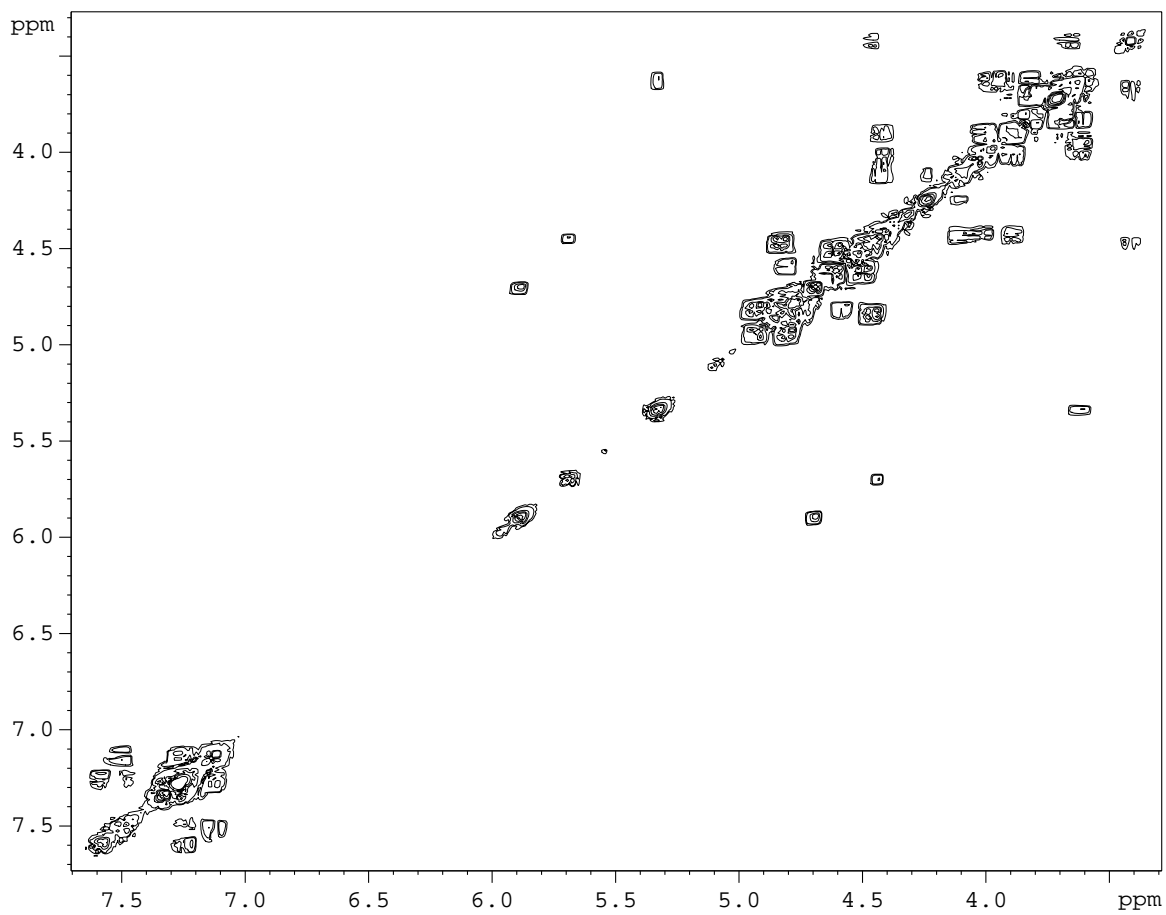

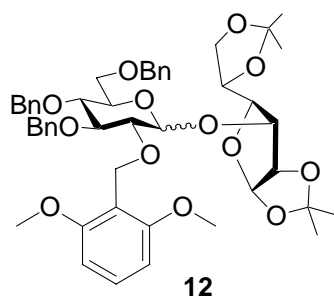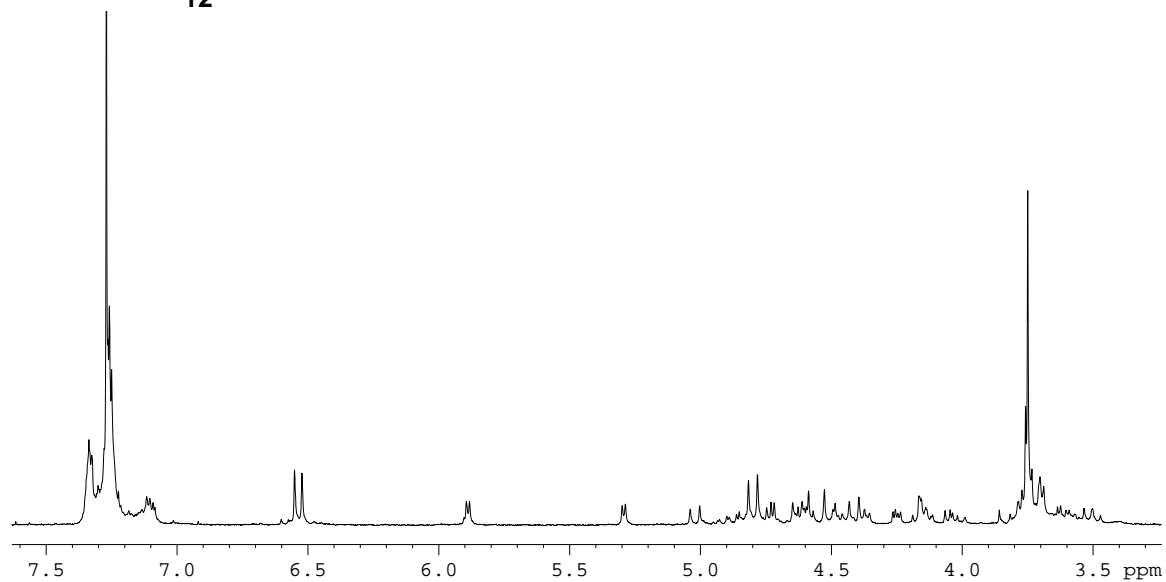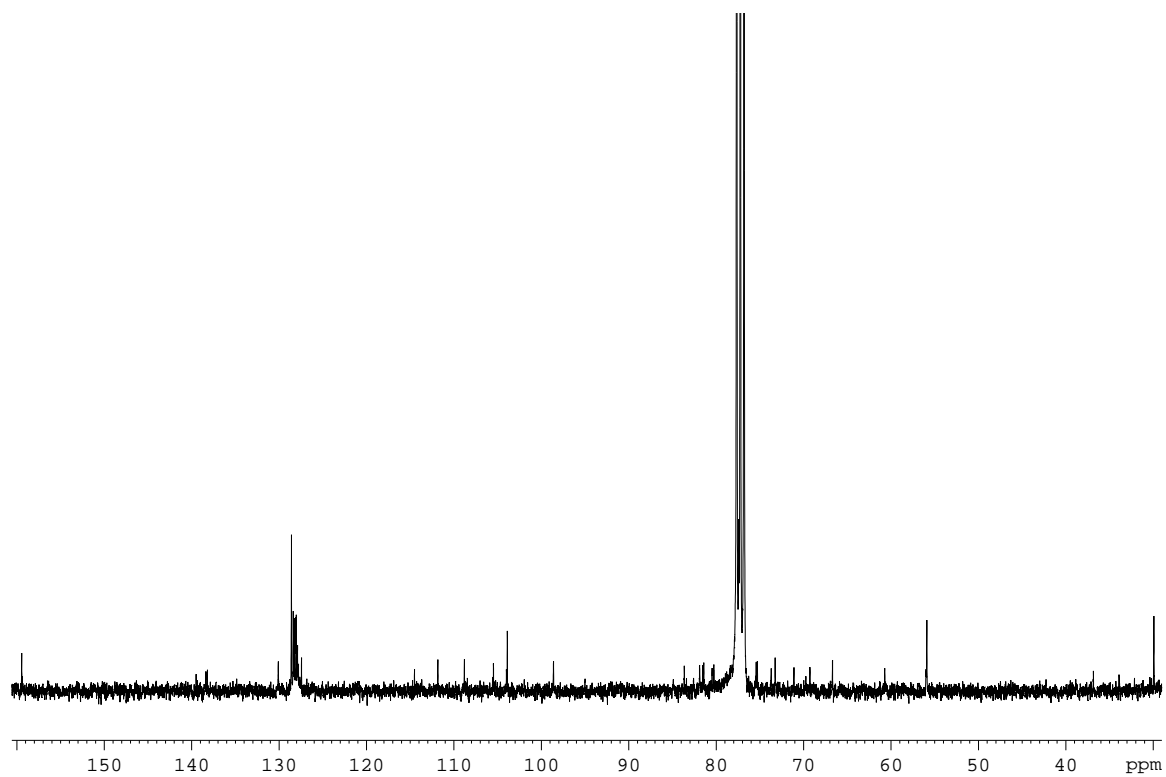

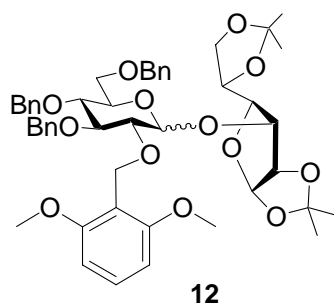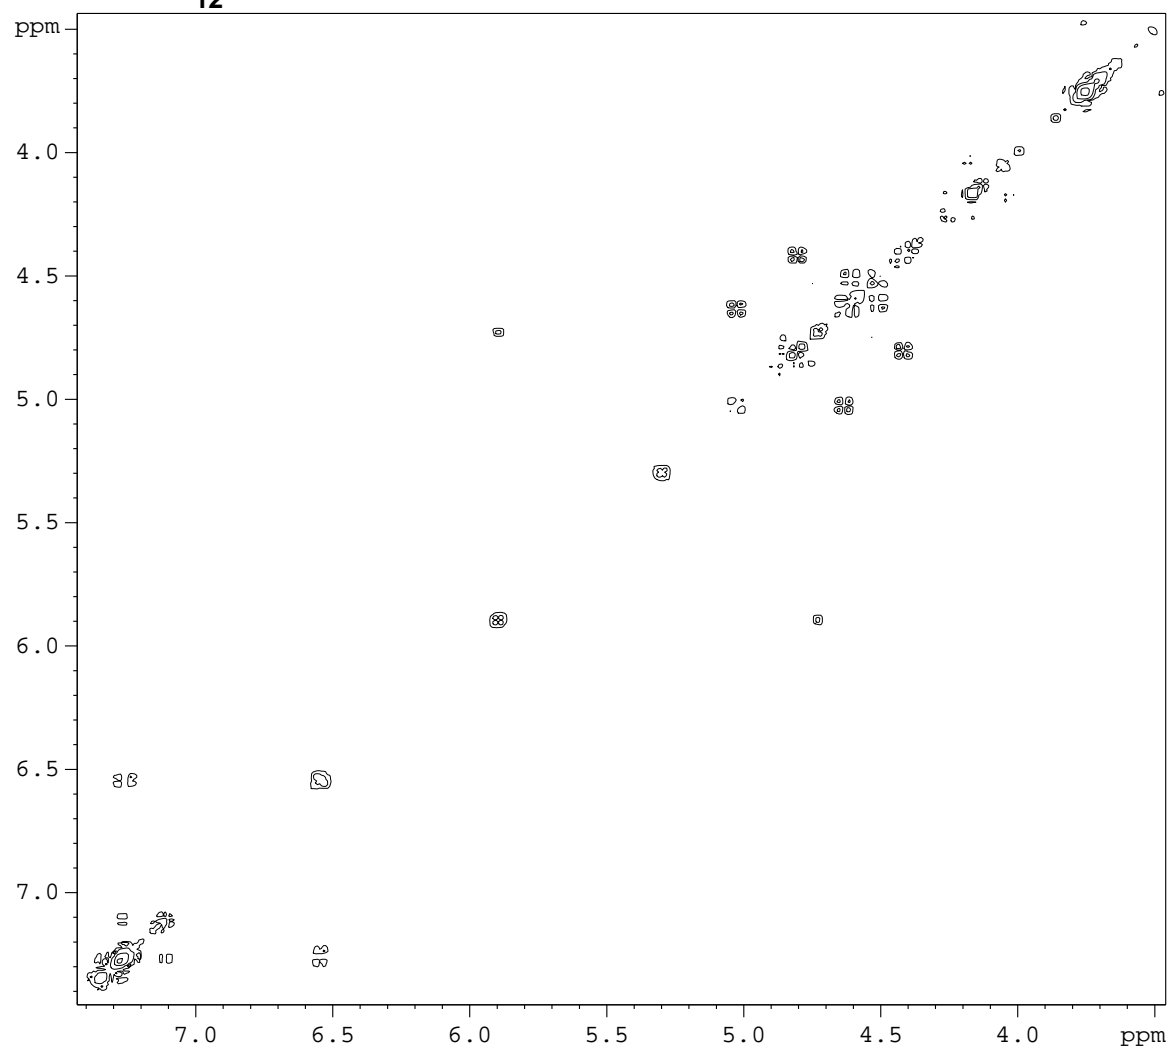

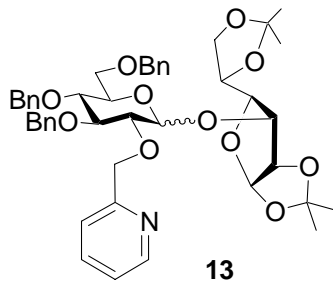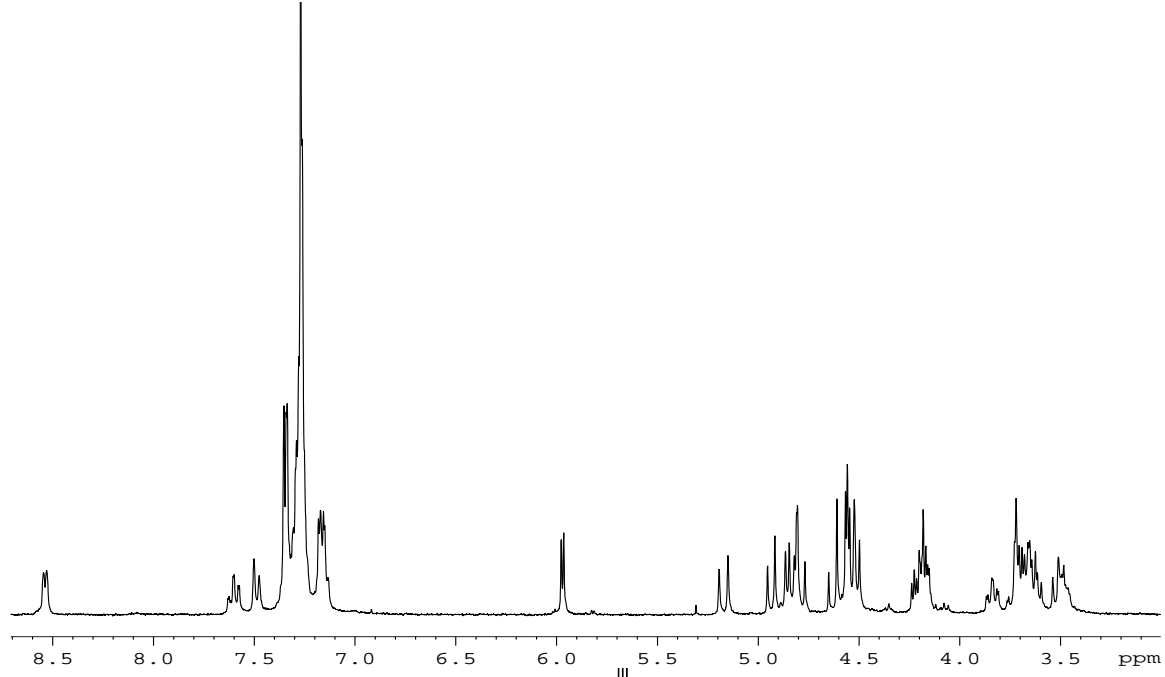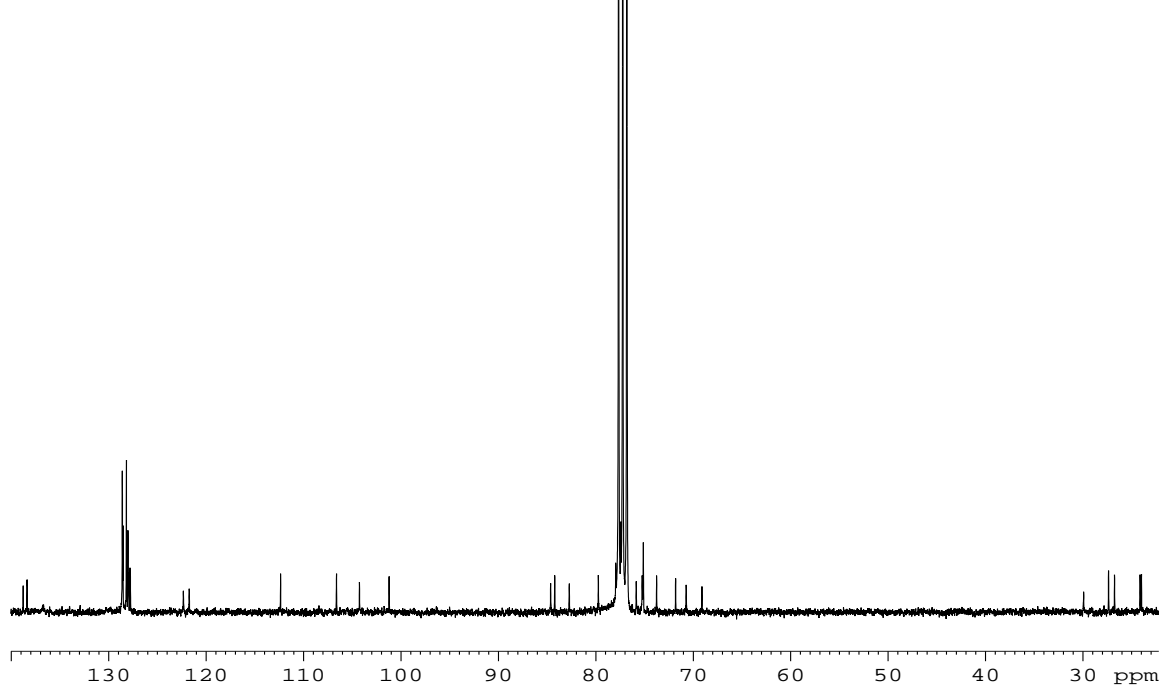

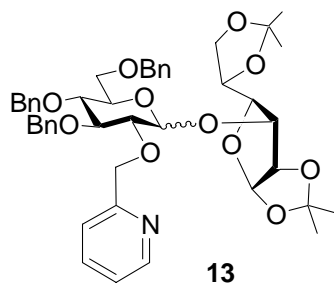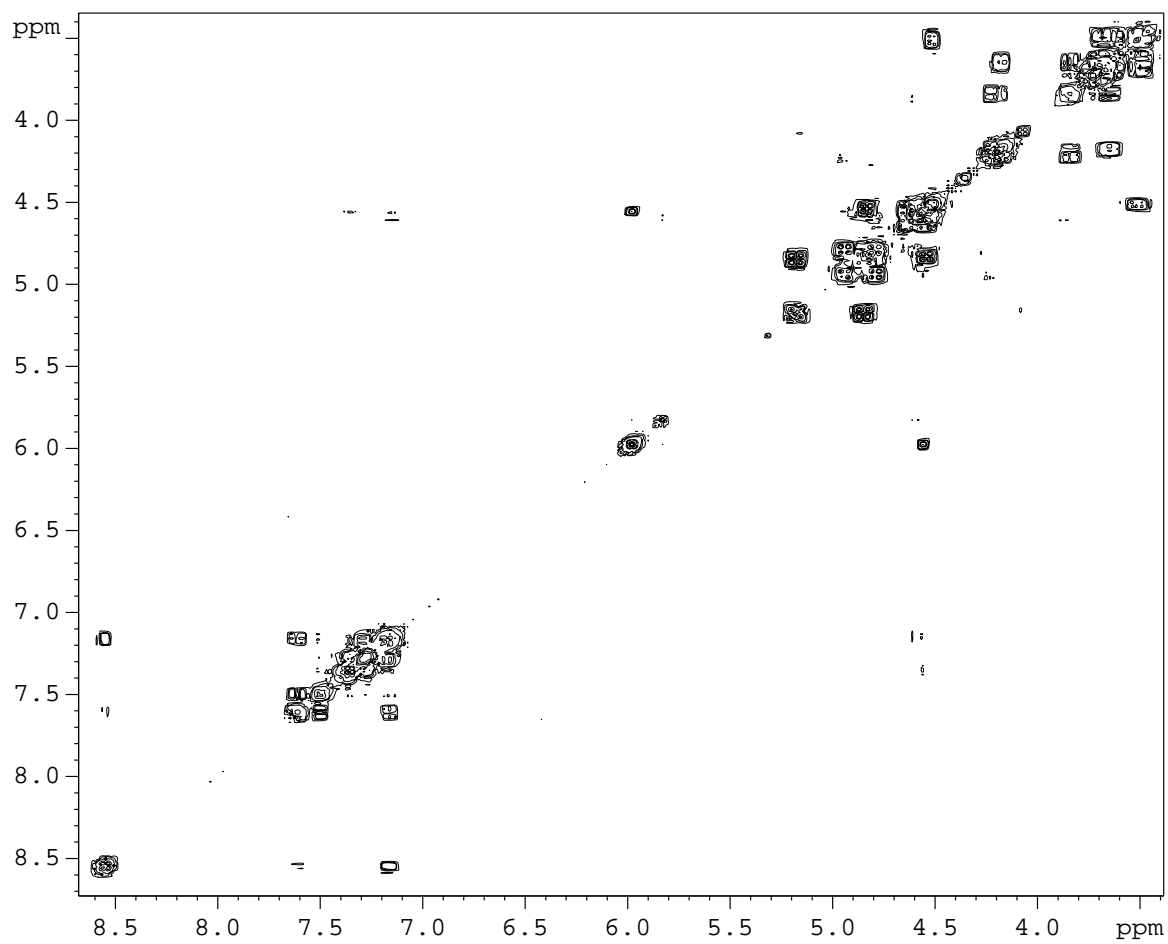

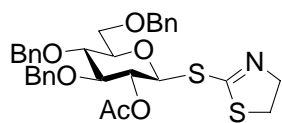

14a

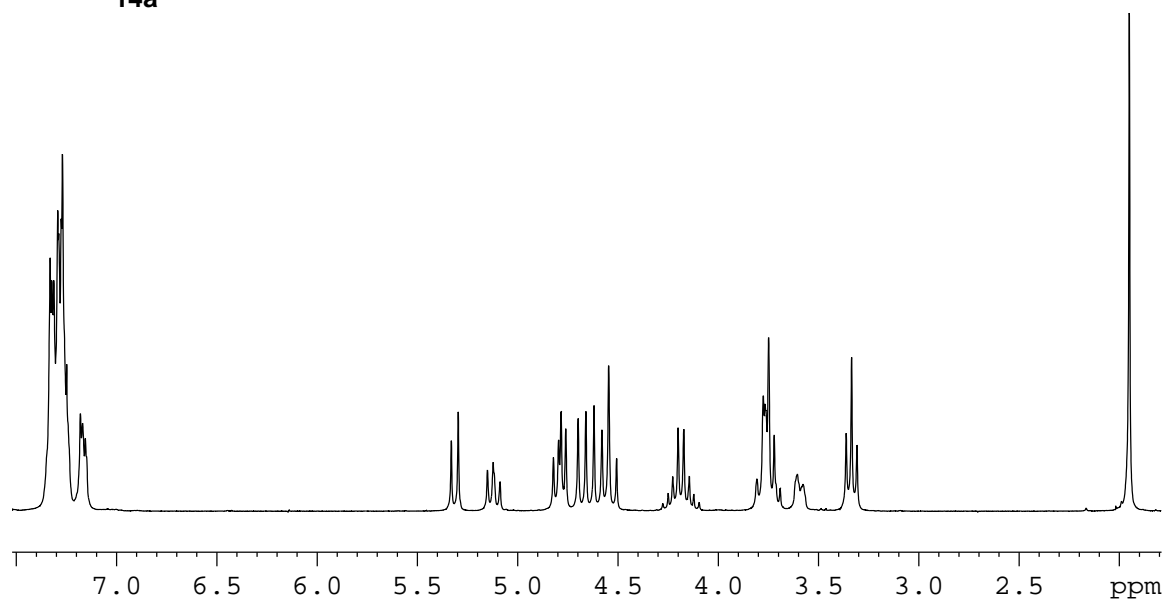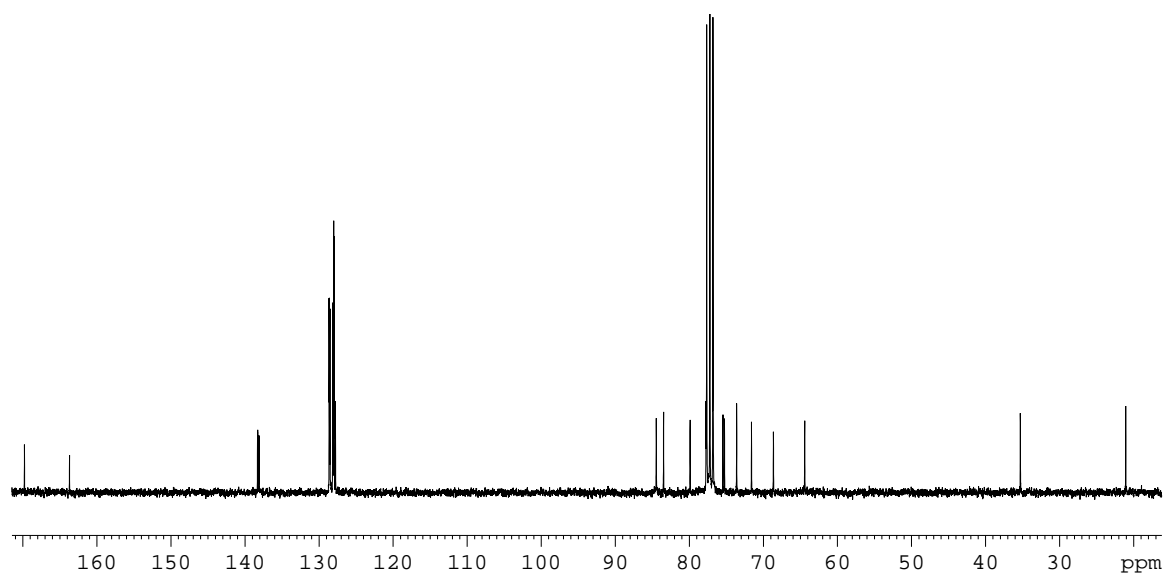

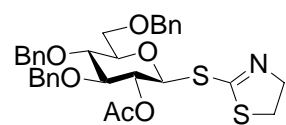

14a

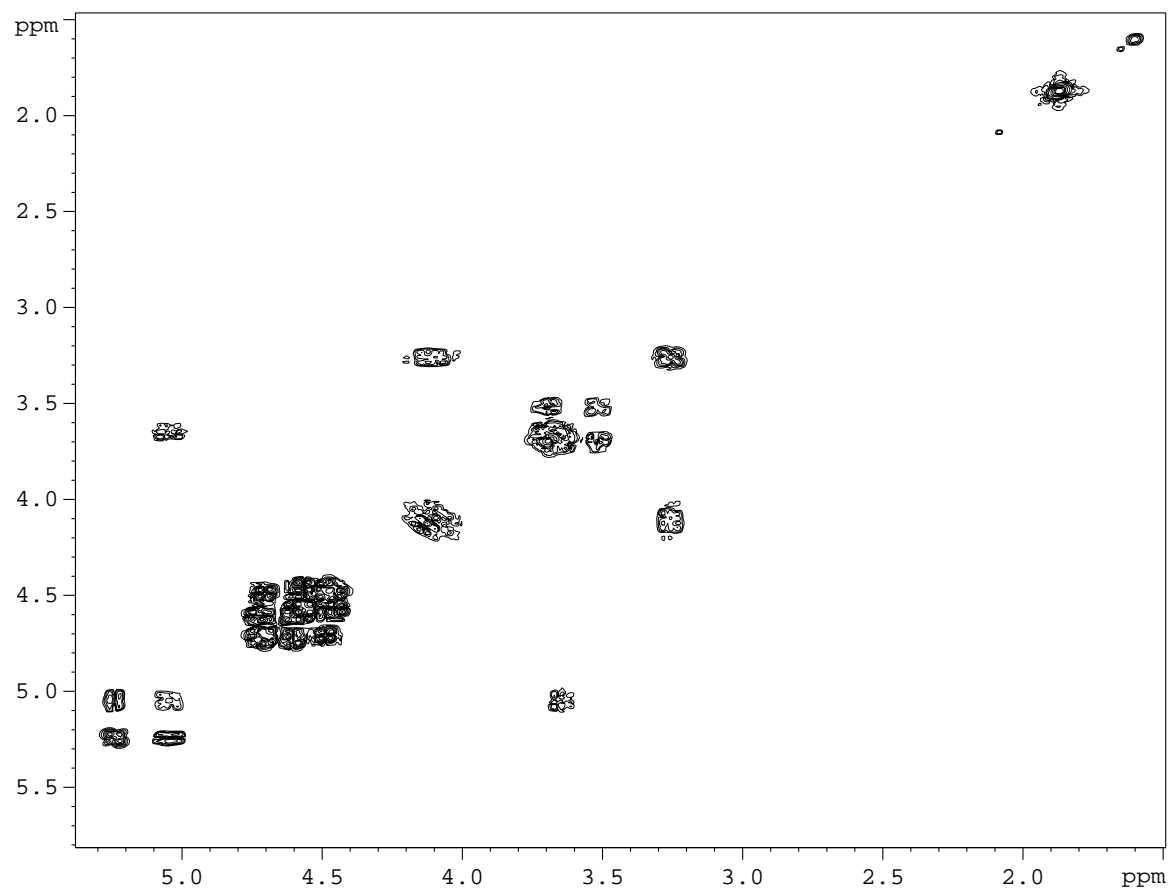



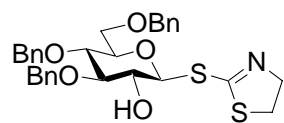

15a

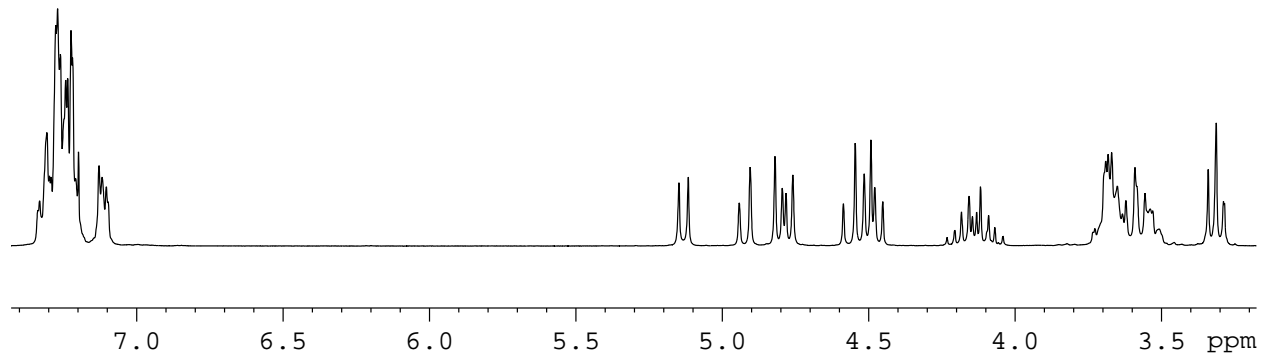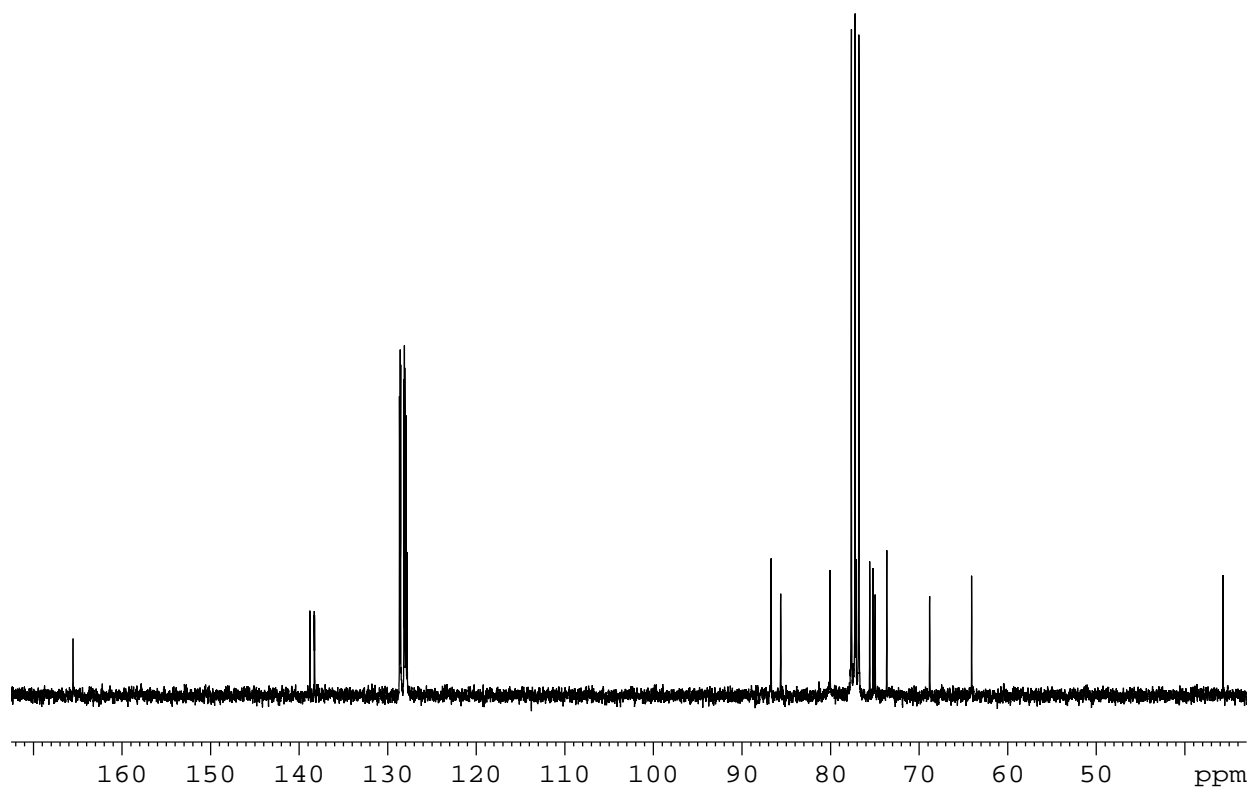

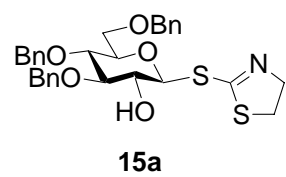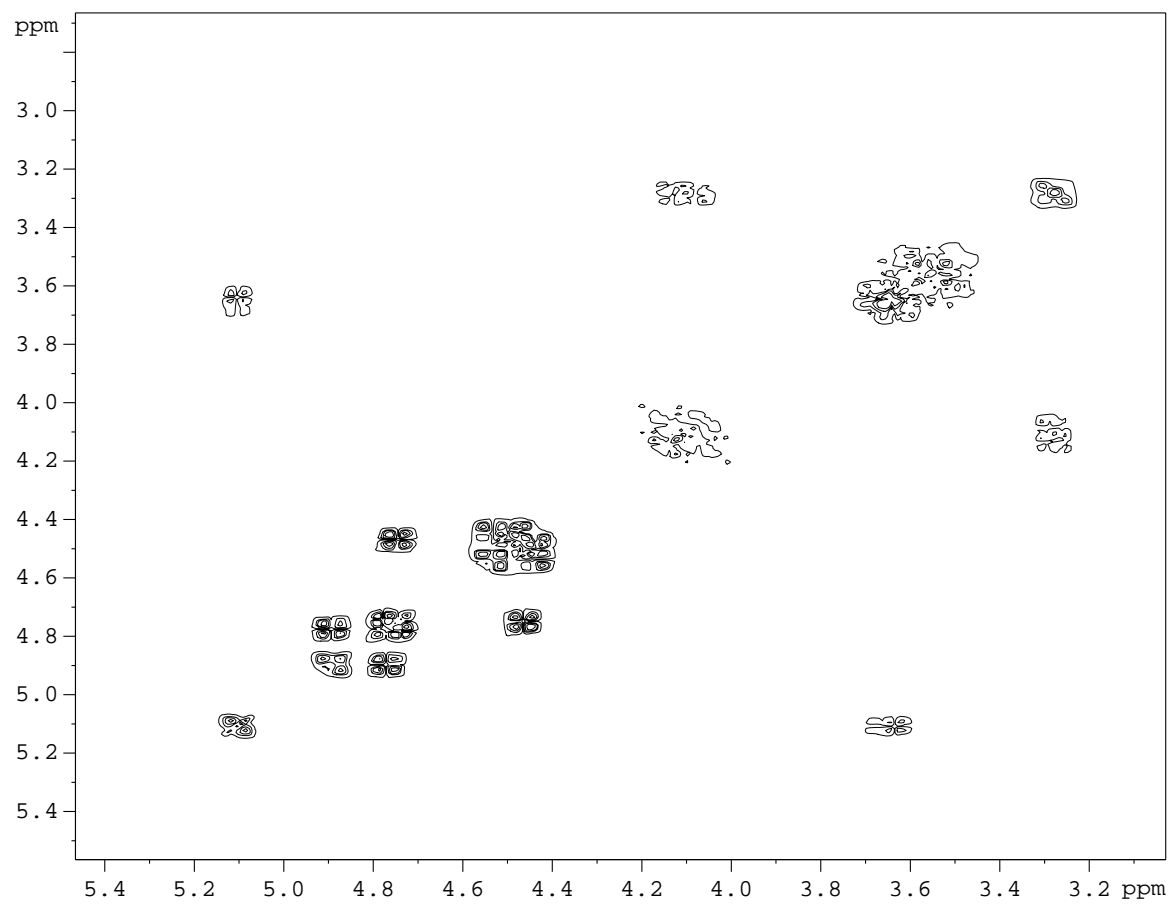

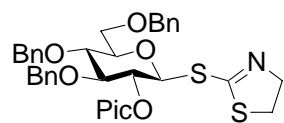

16a

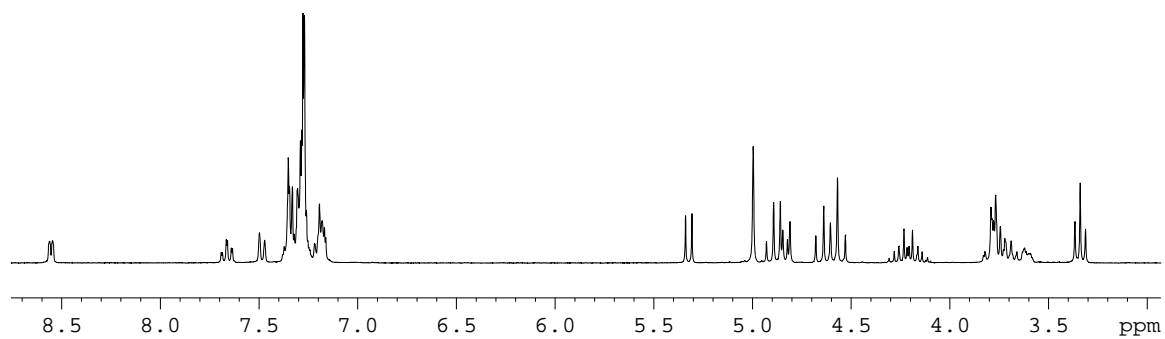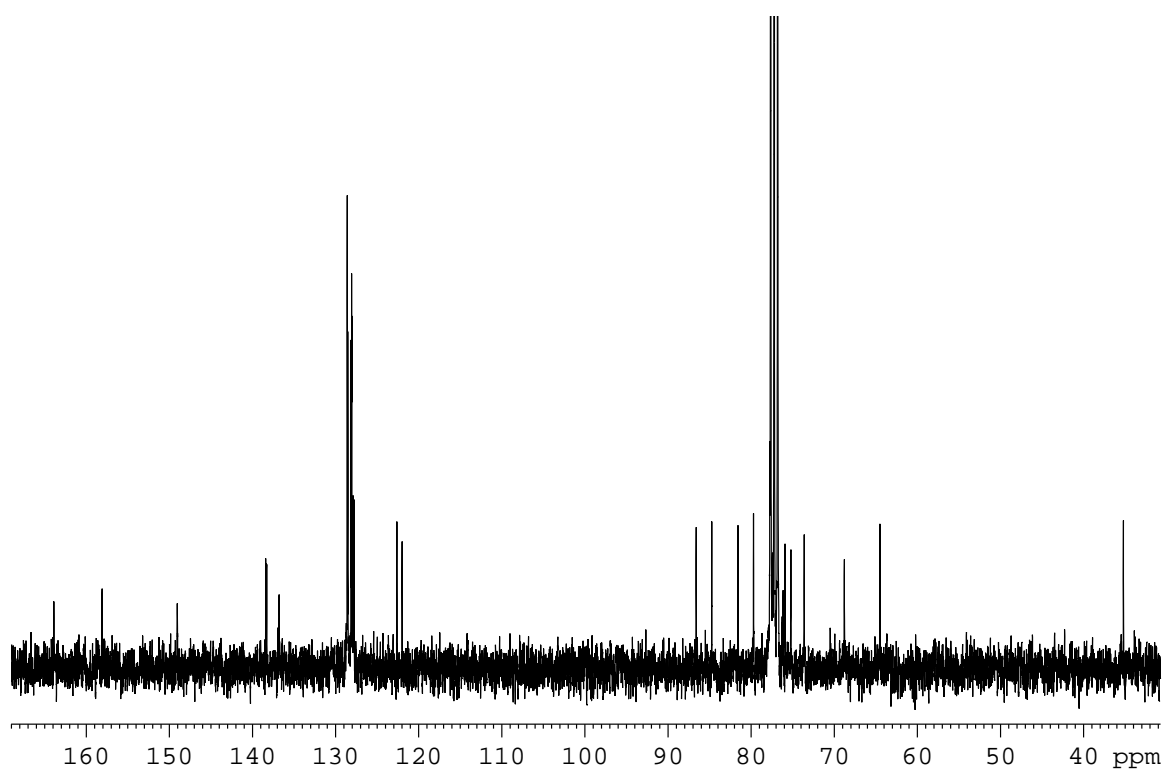

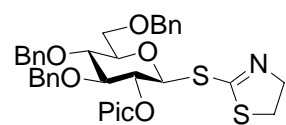

16a

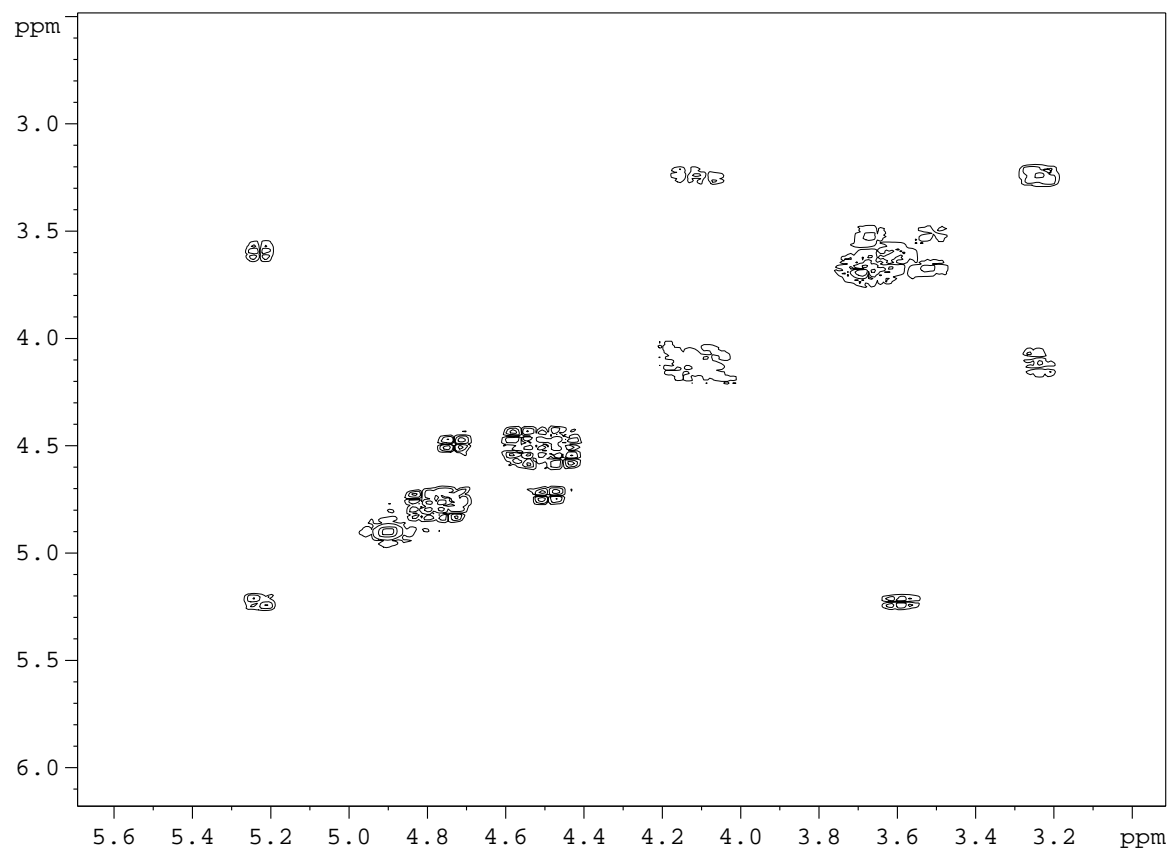

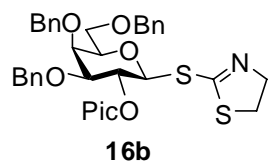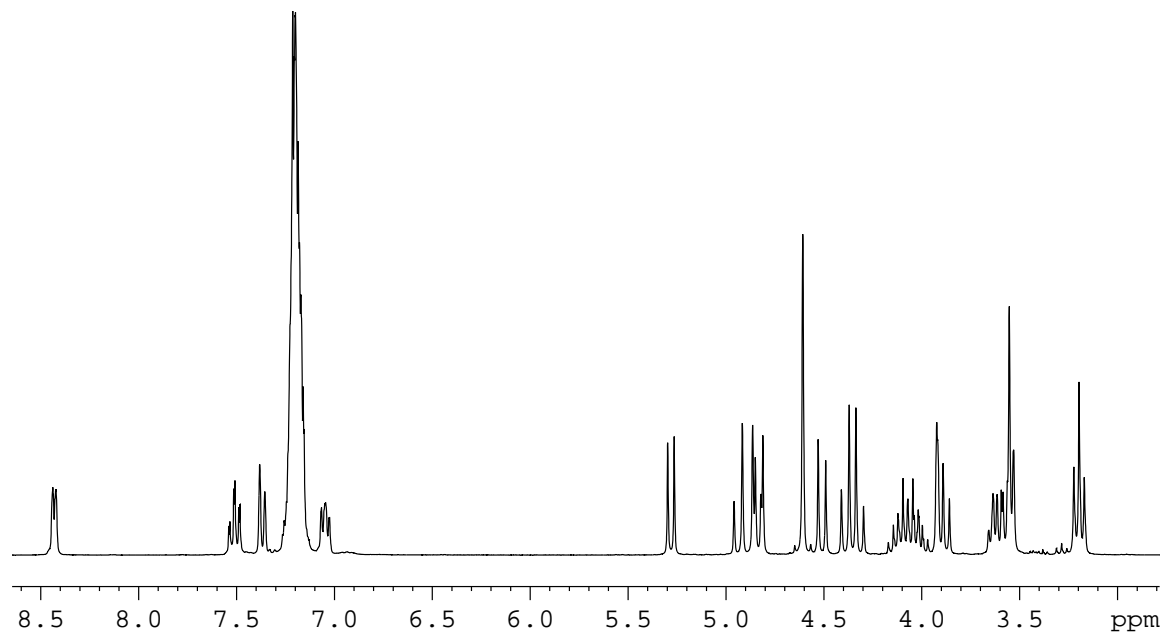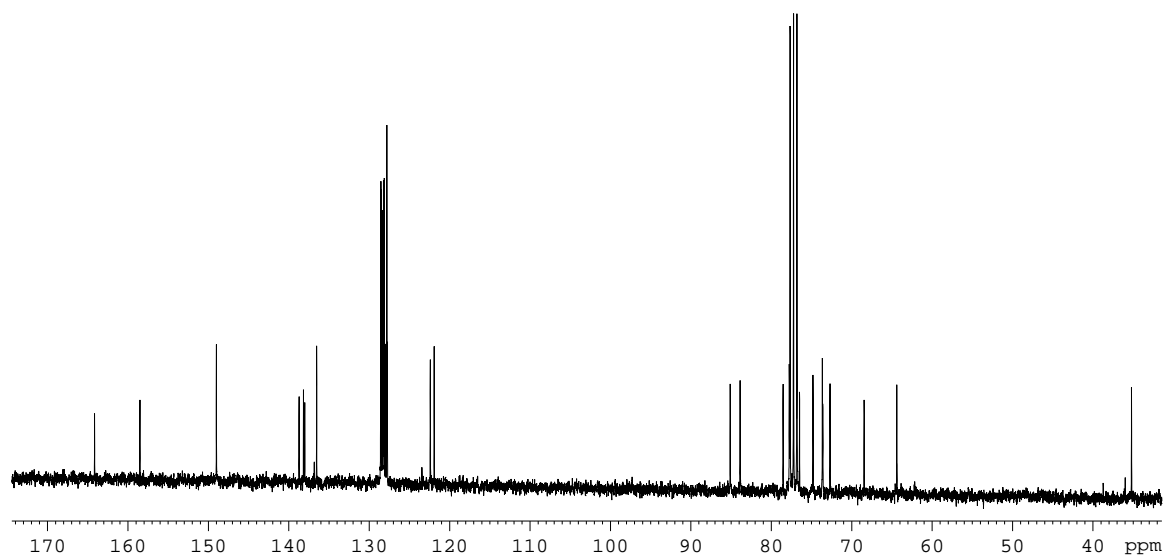

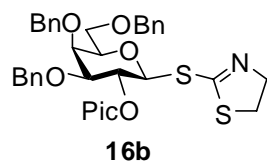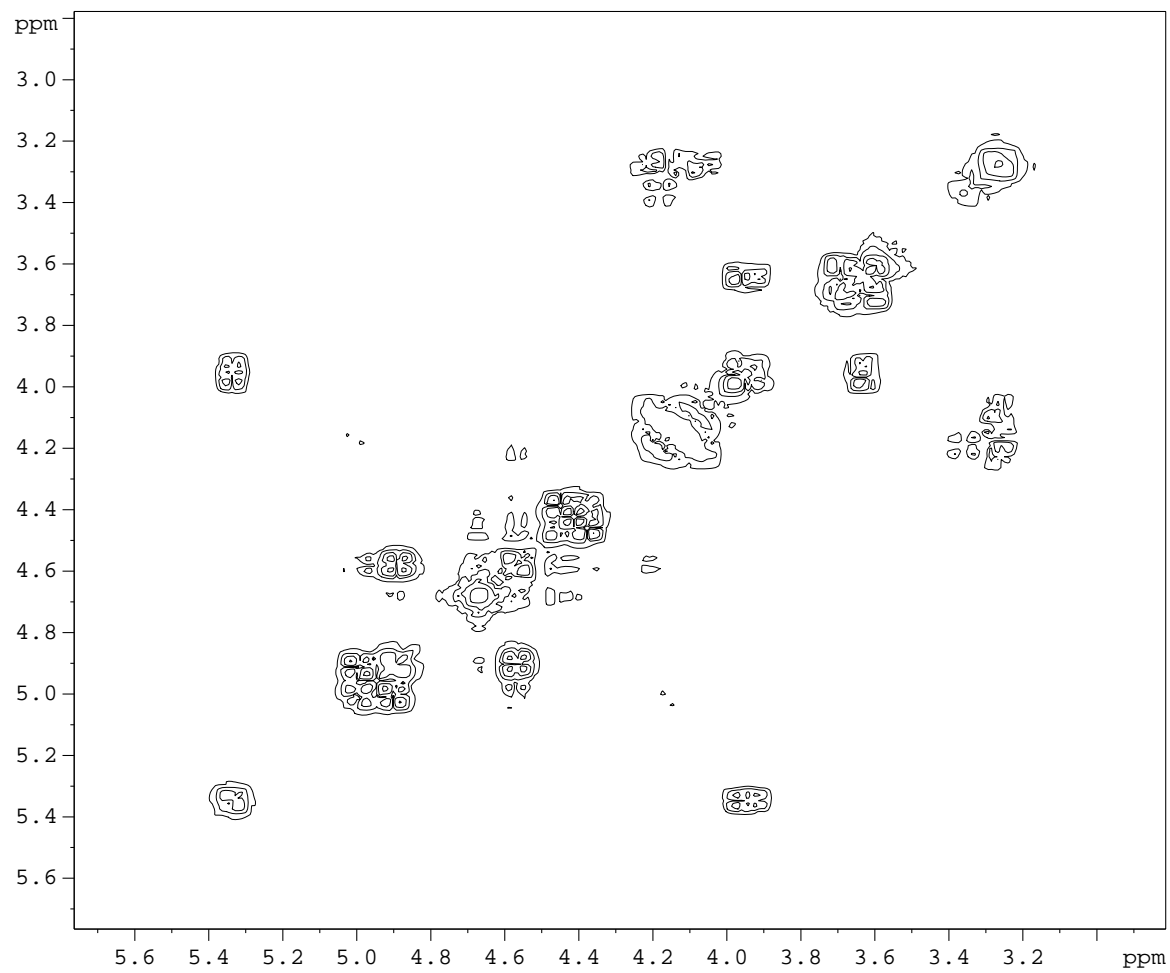

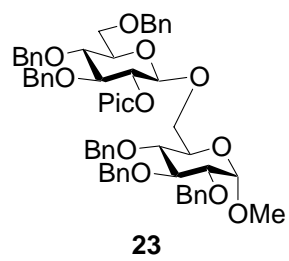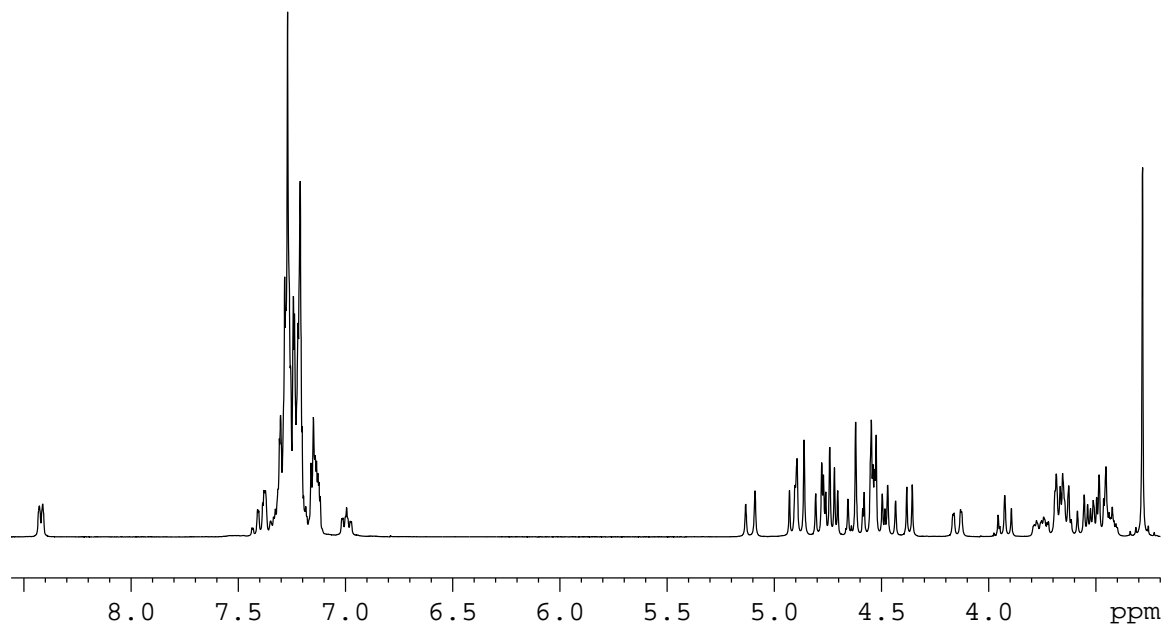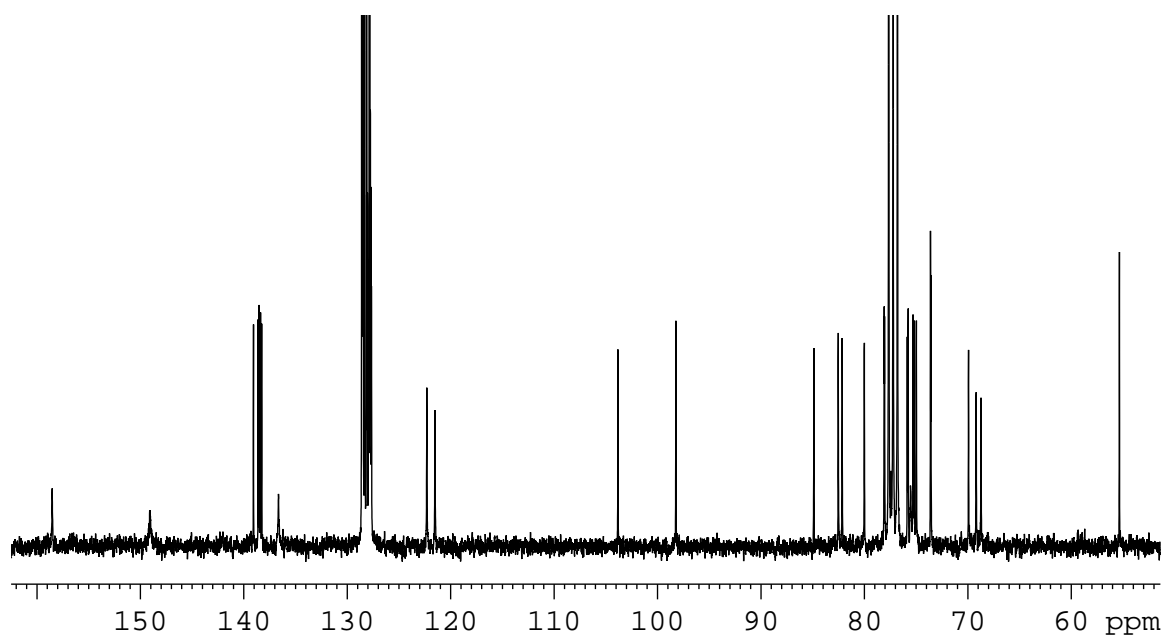

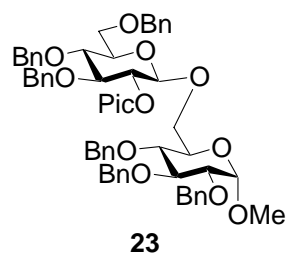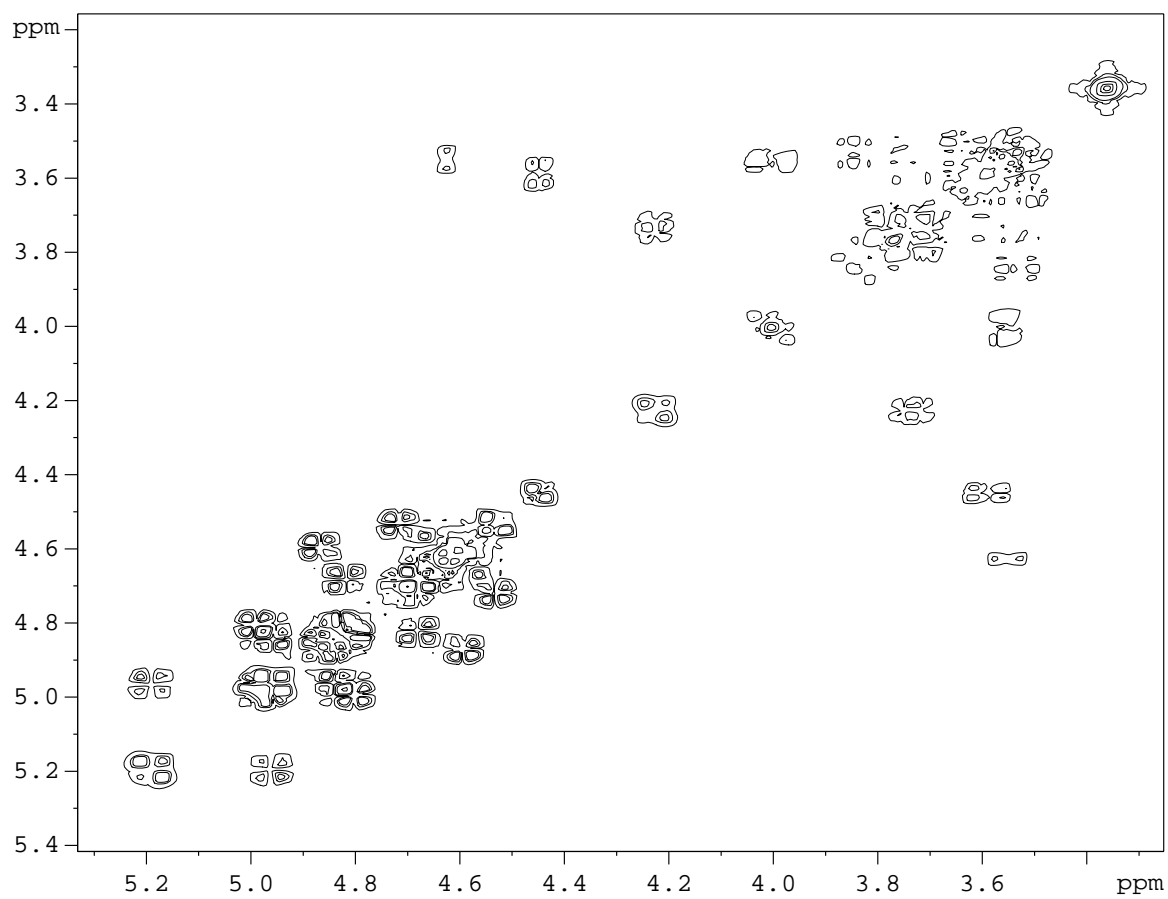



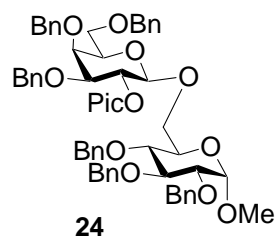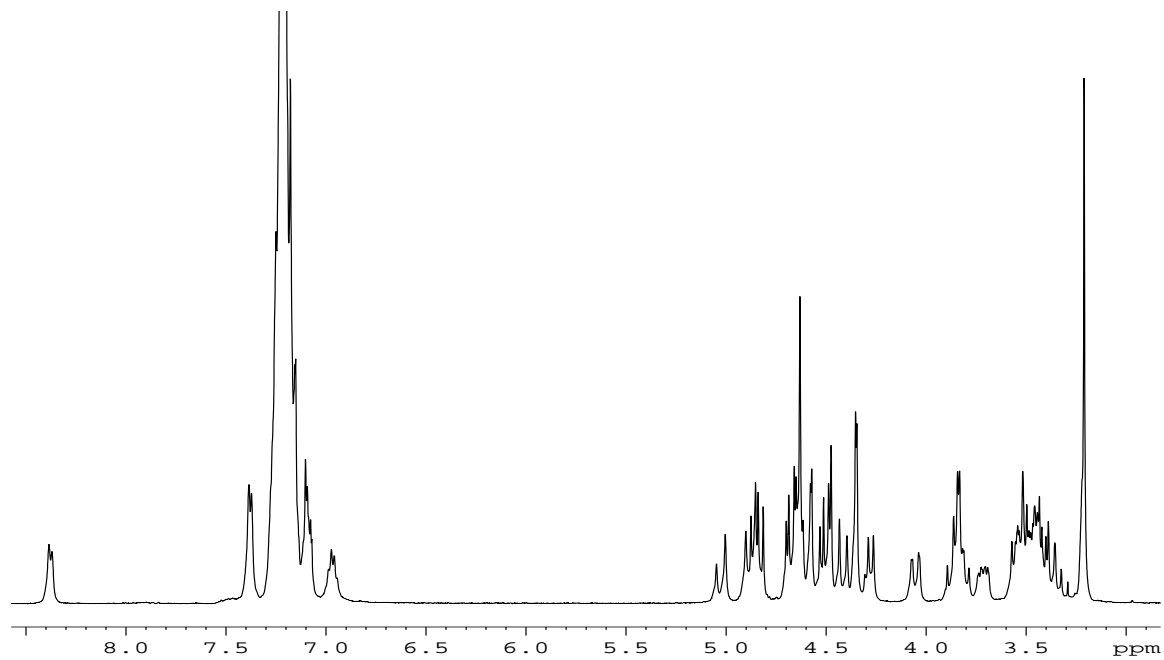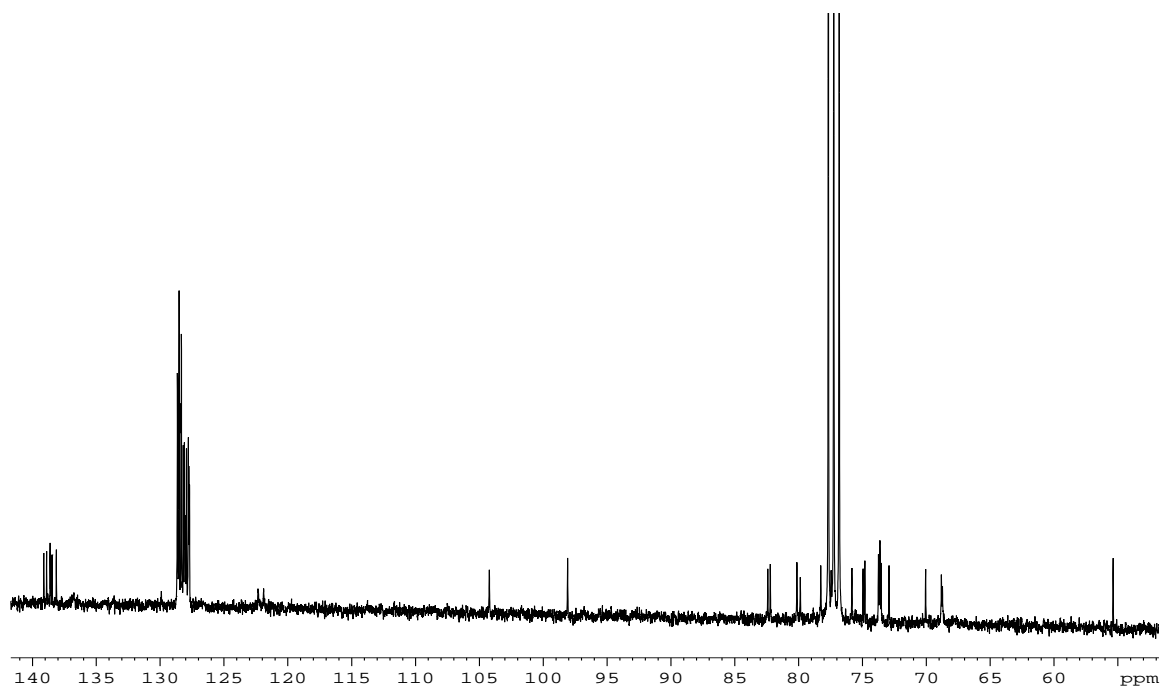

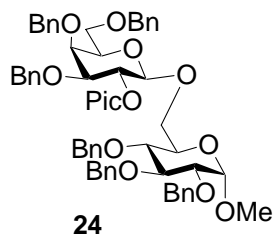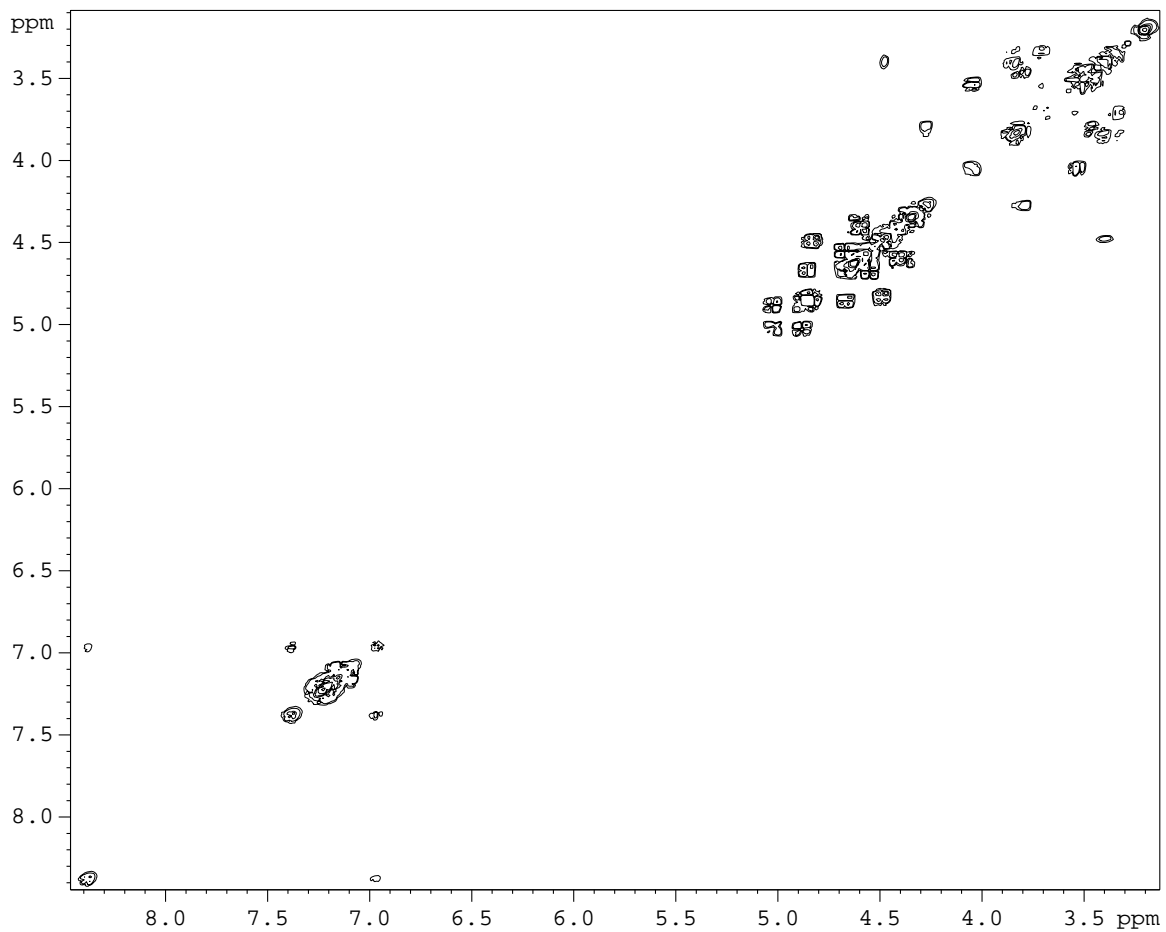

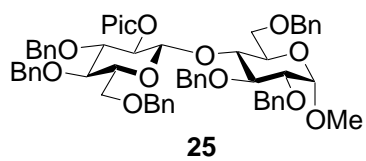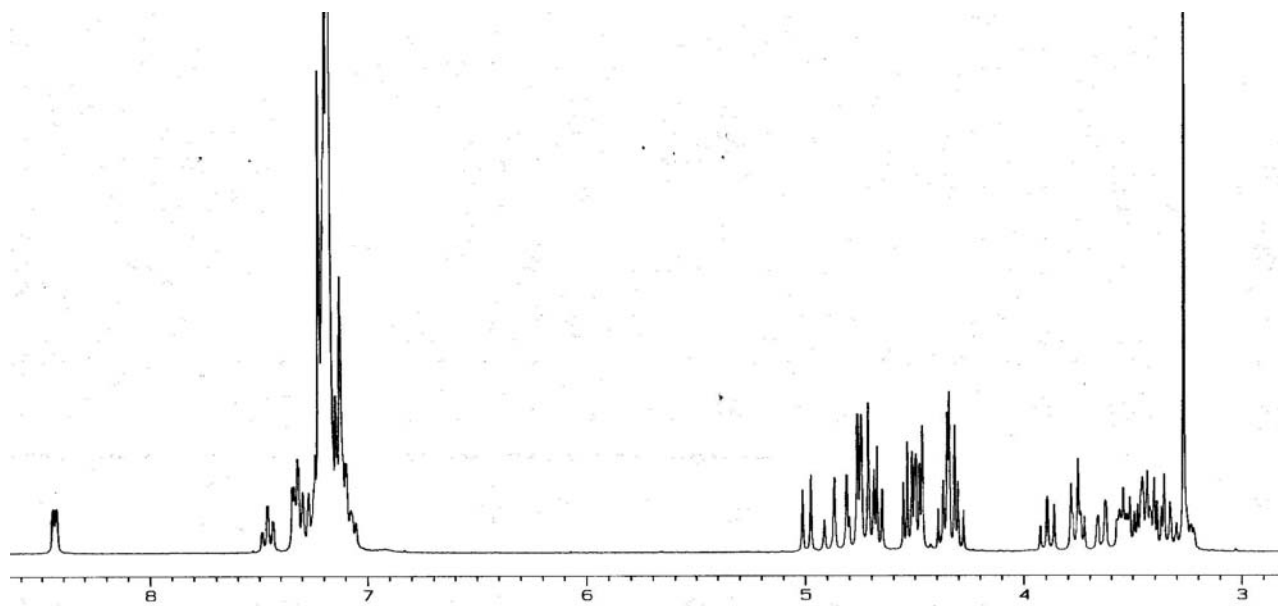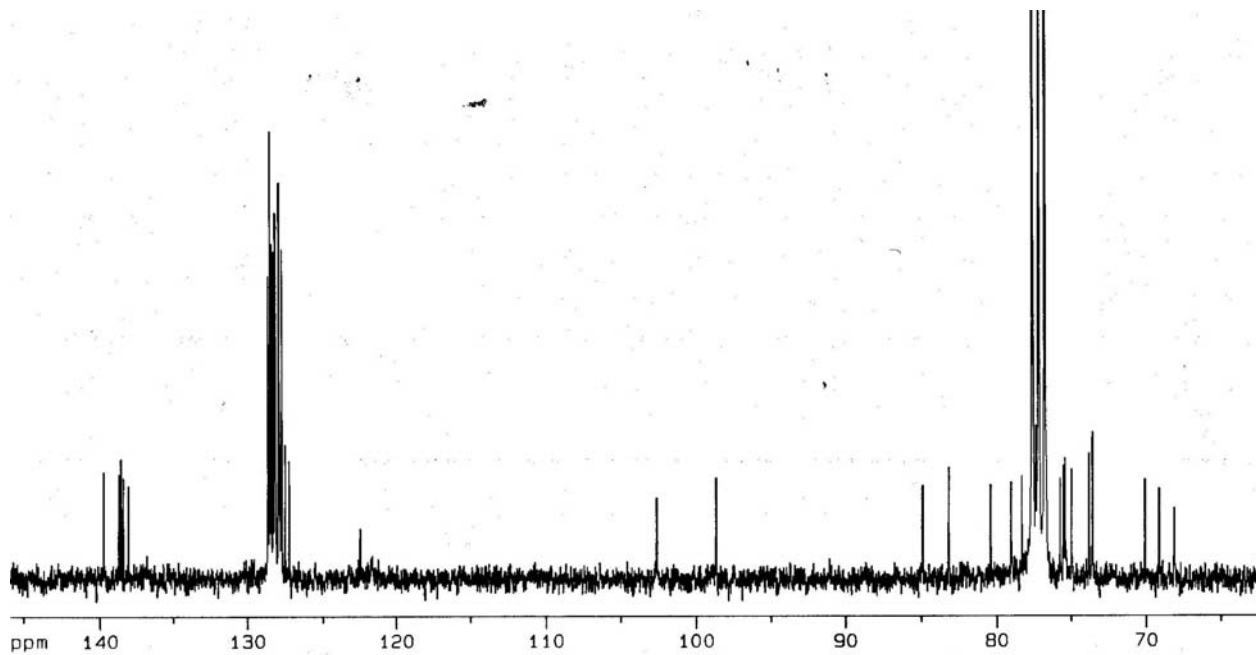

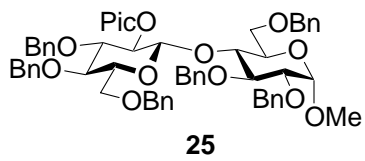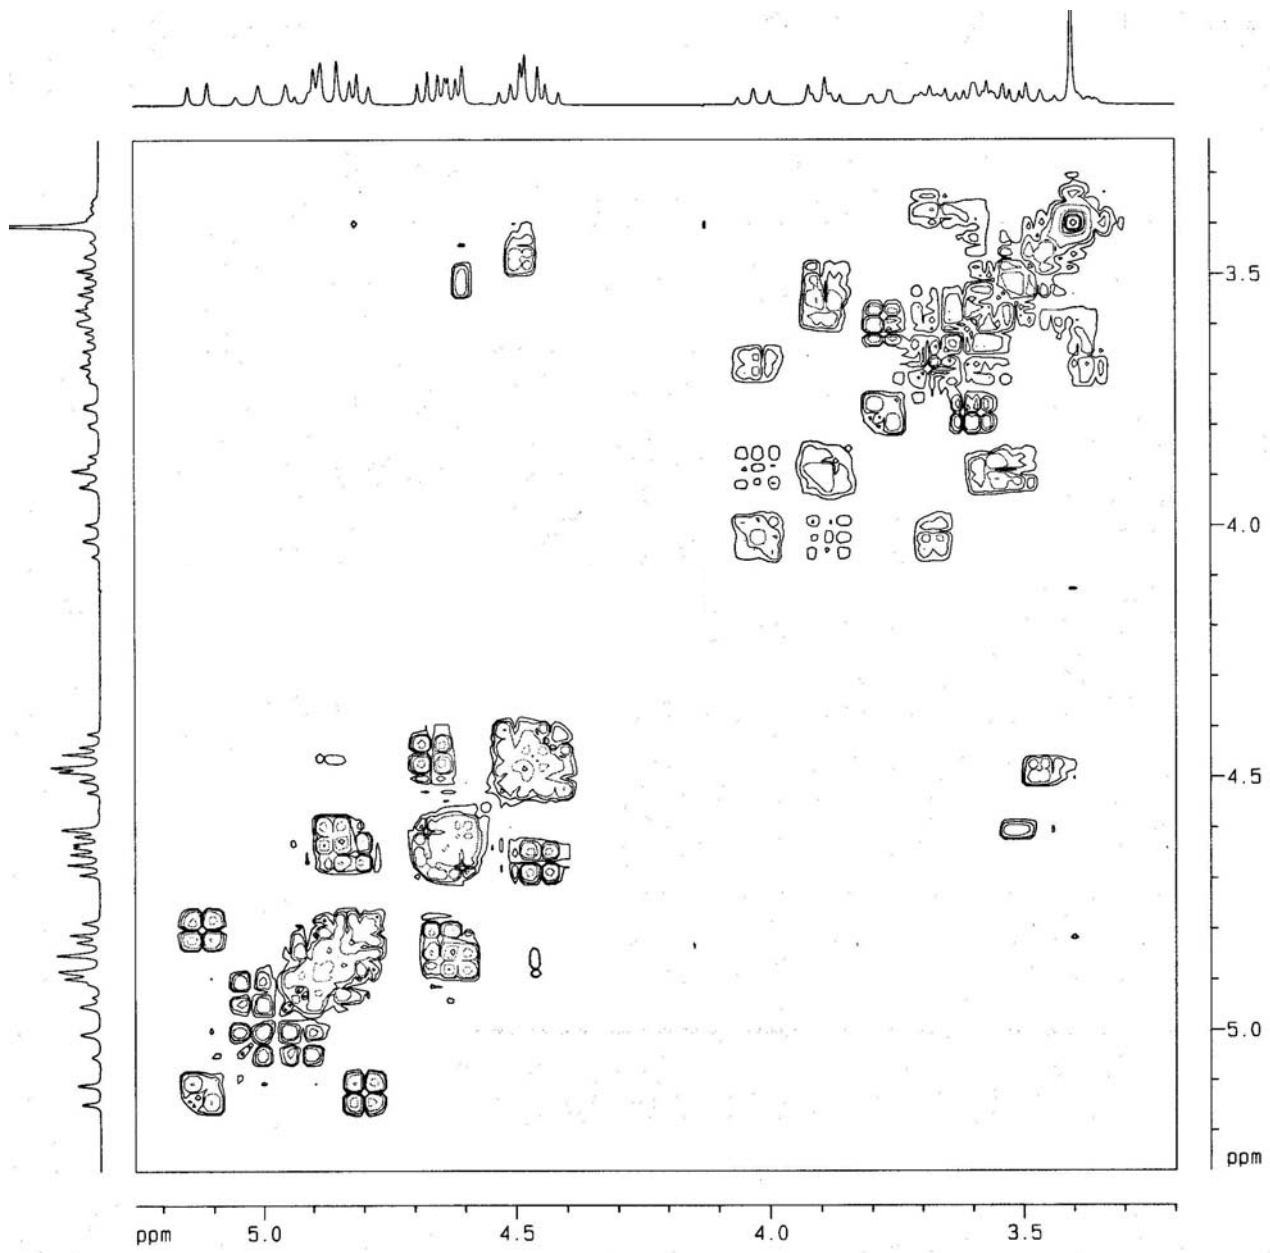

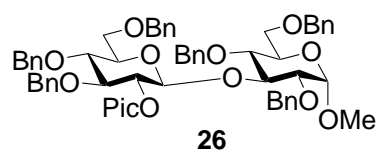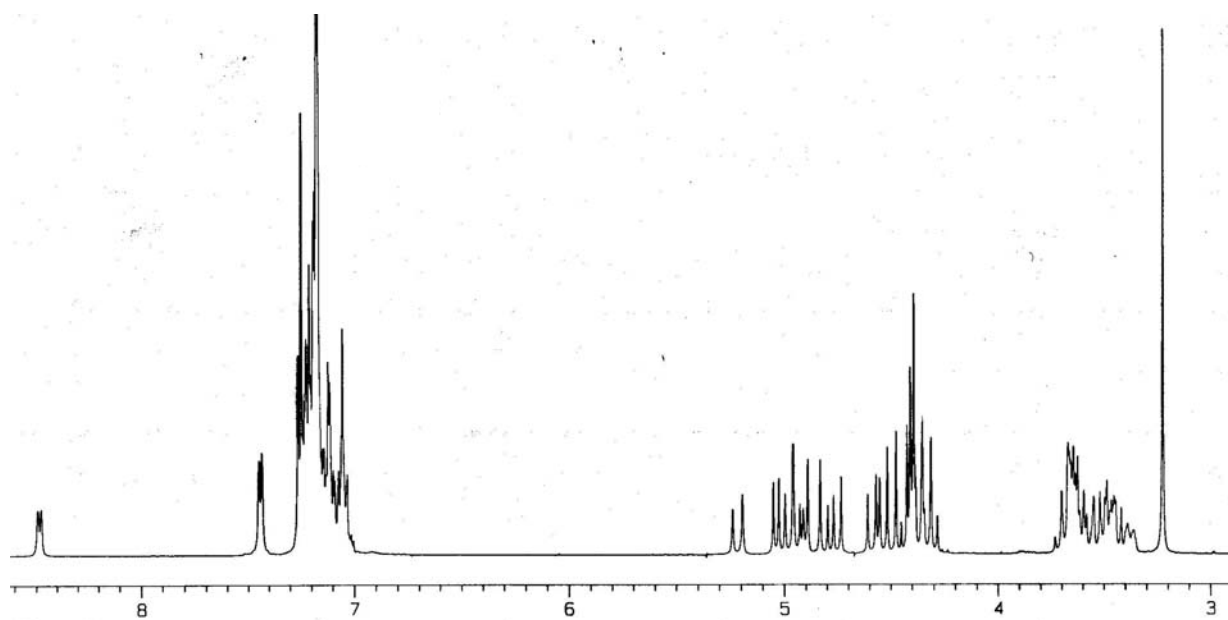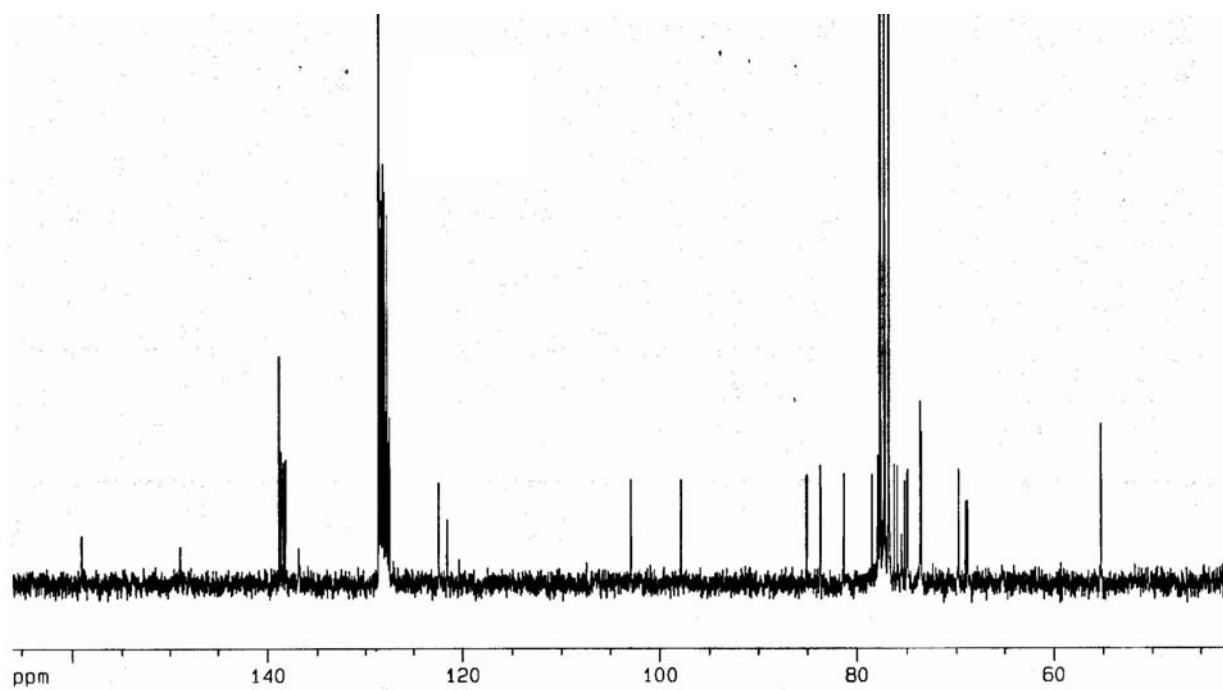

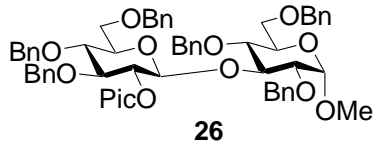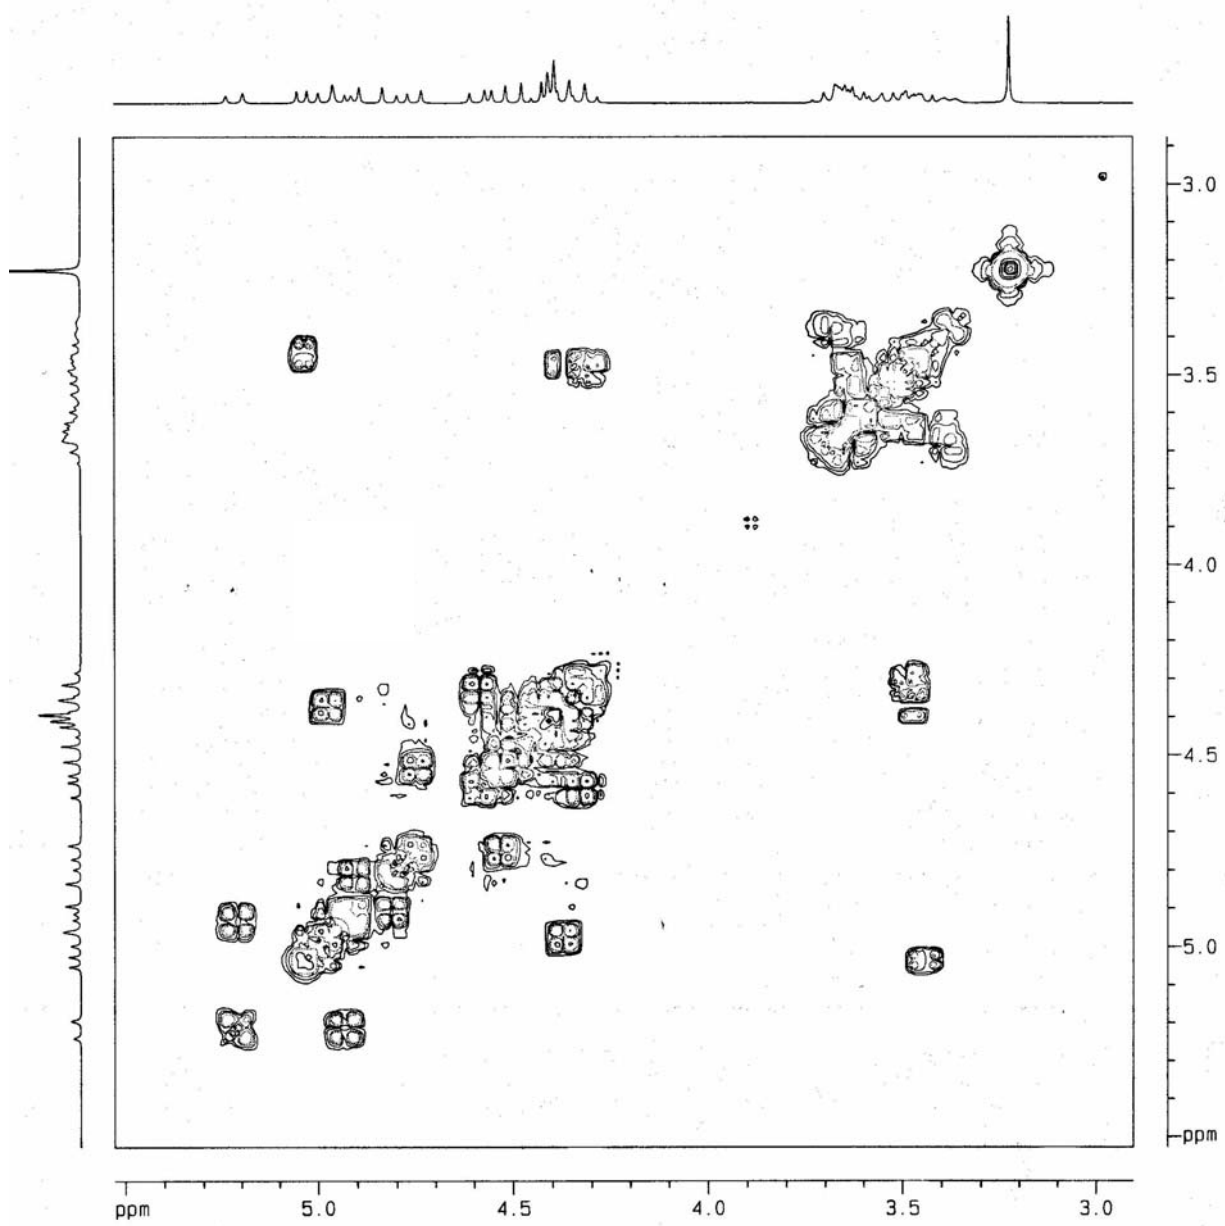

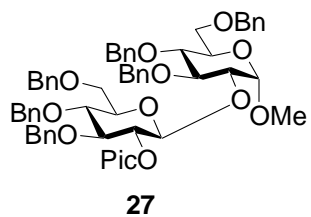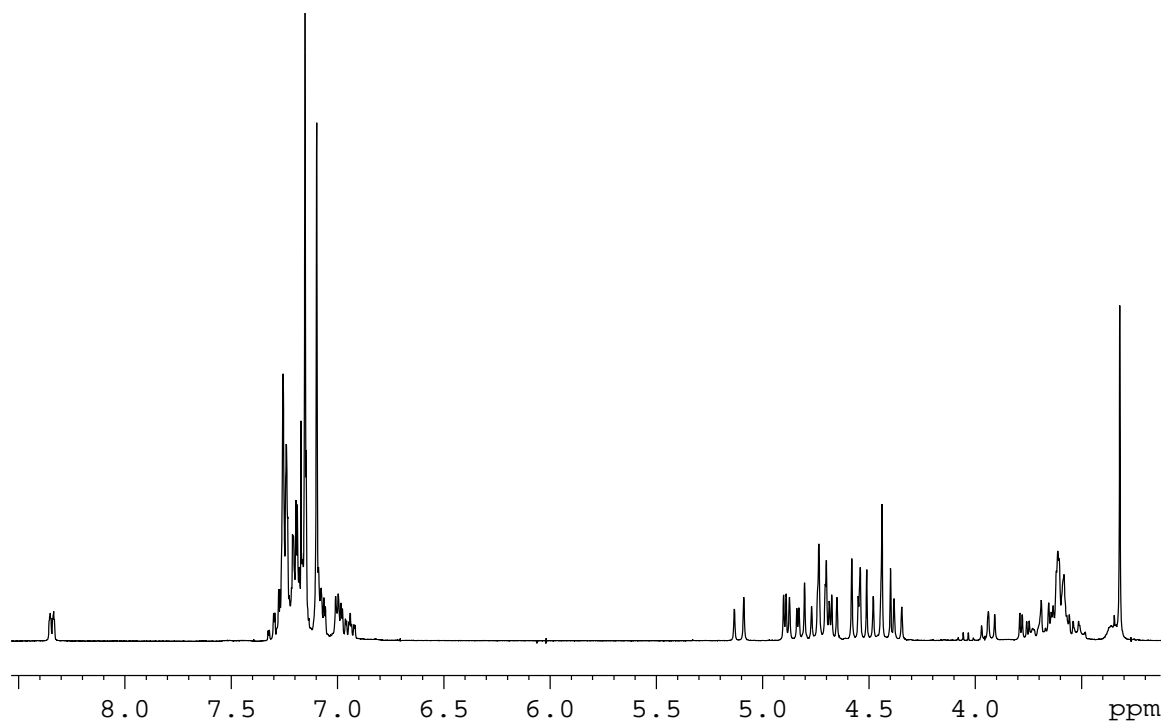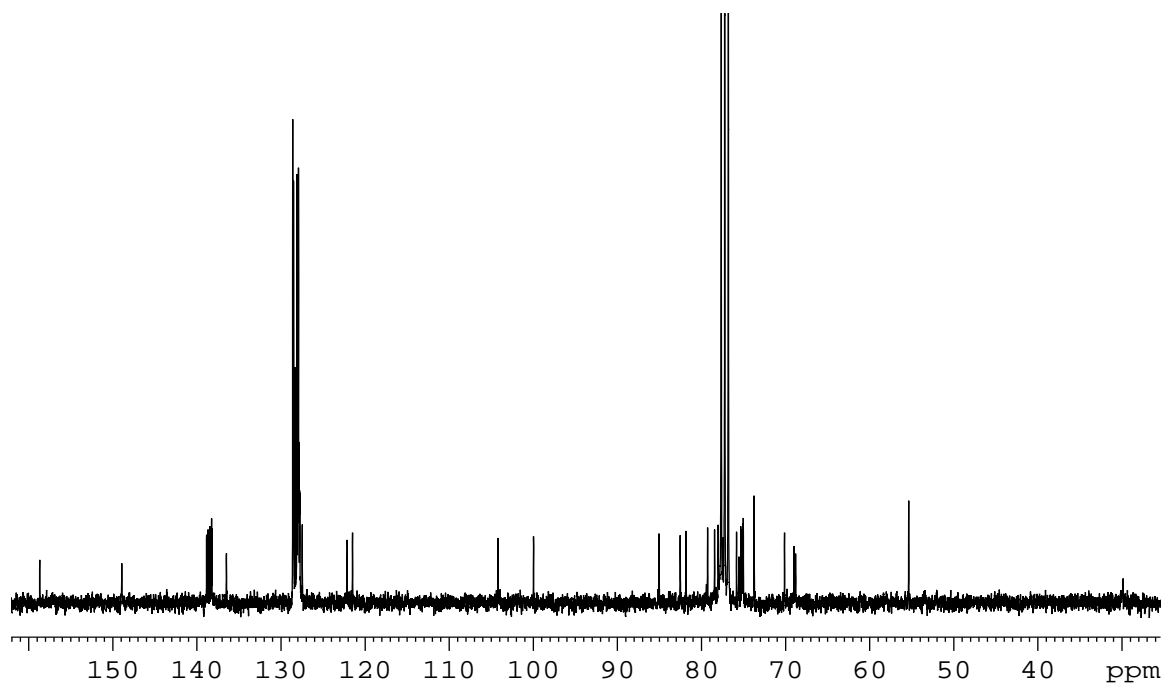

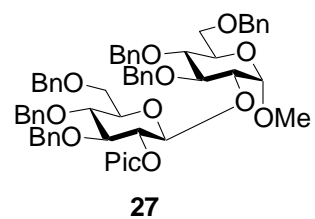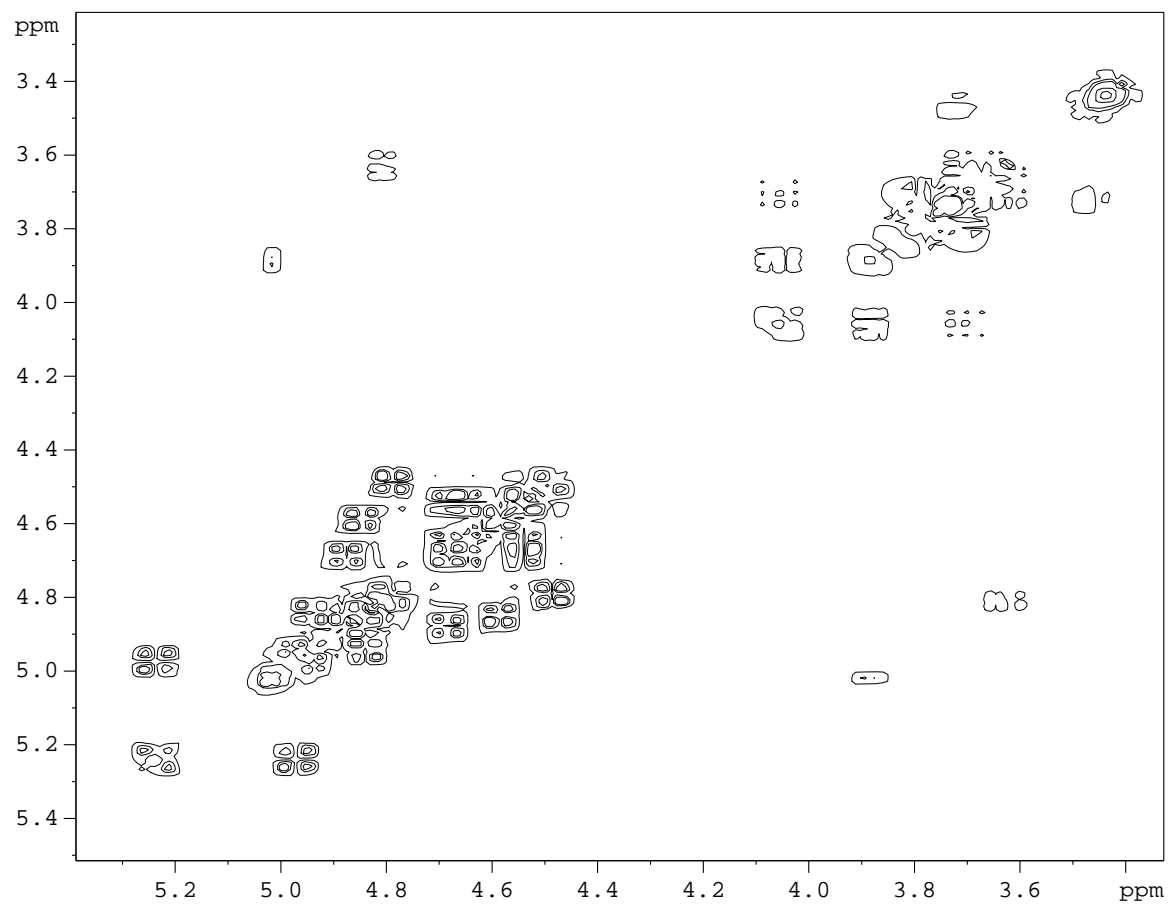



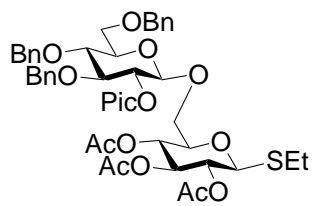

28a

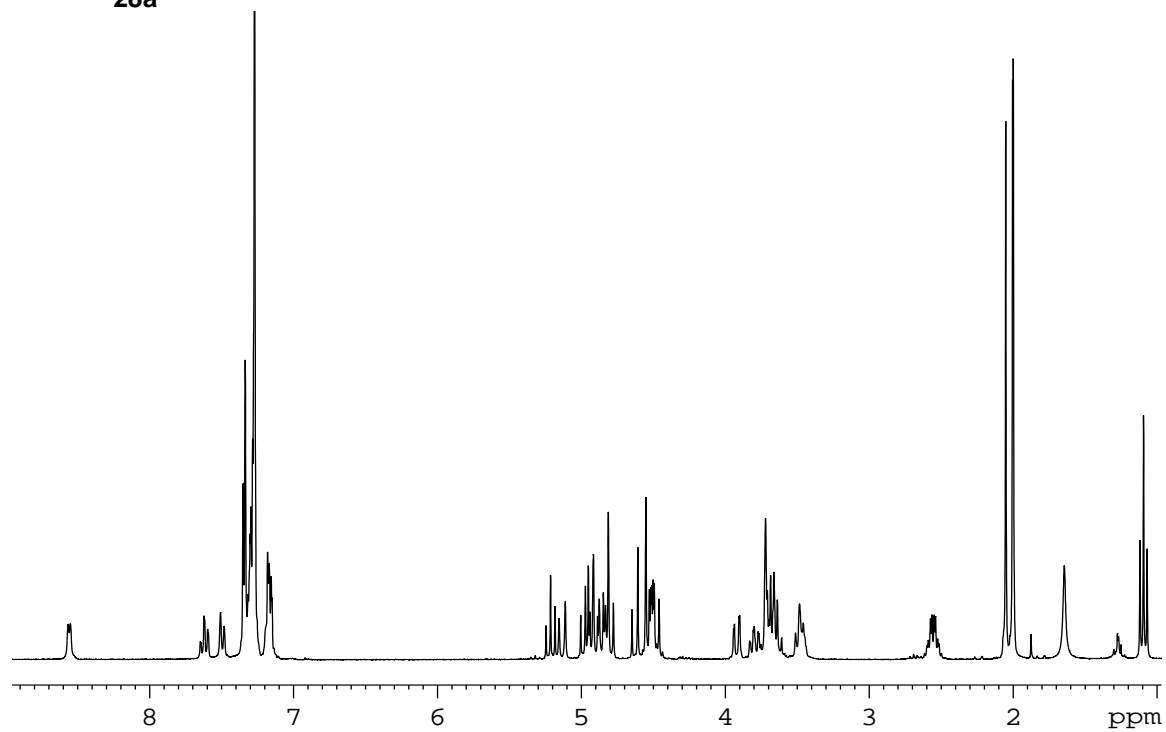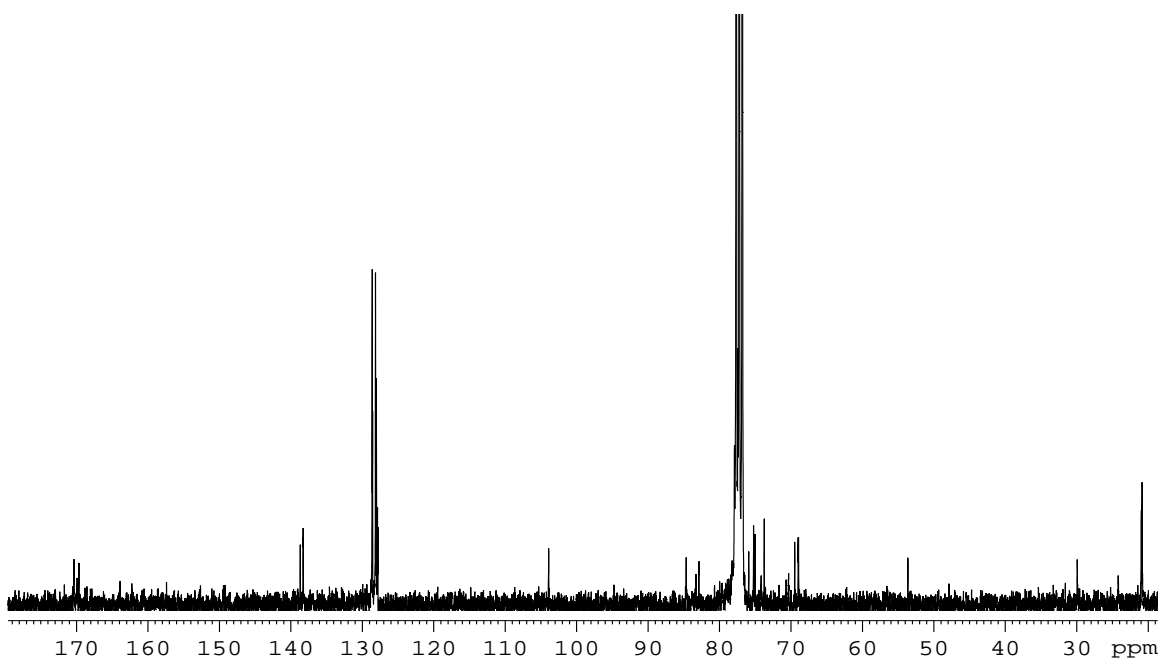

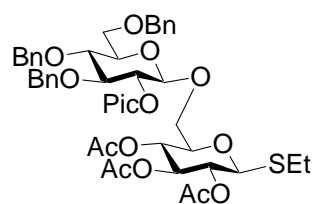

**28a**

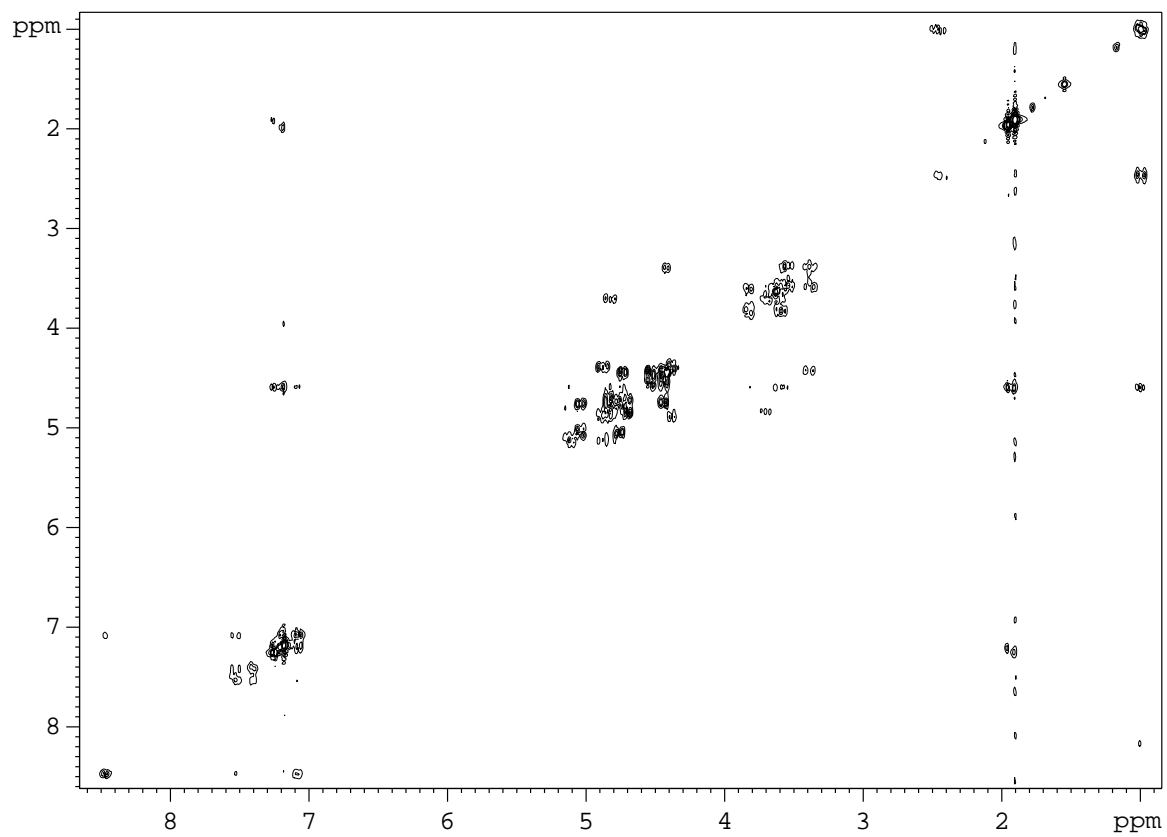

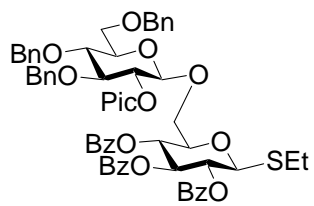

28b

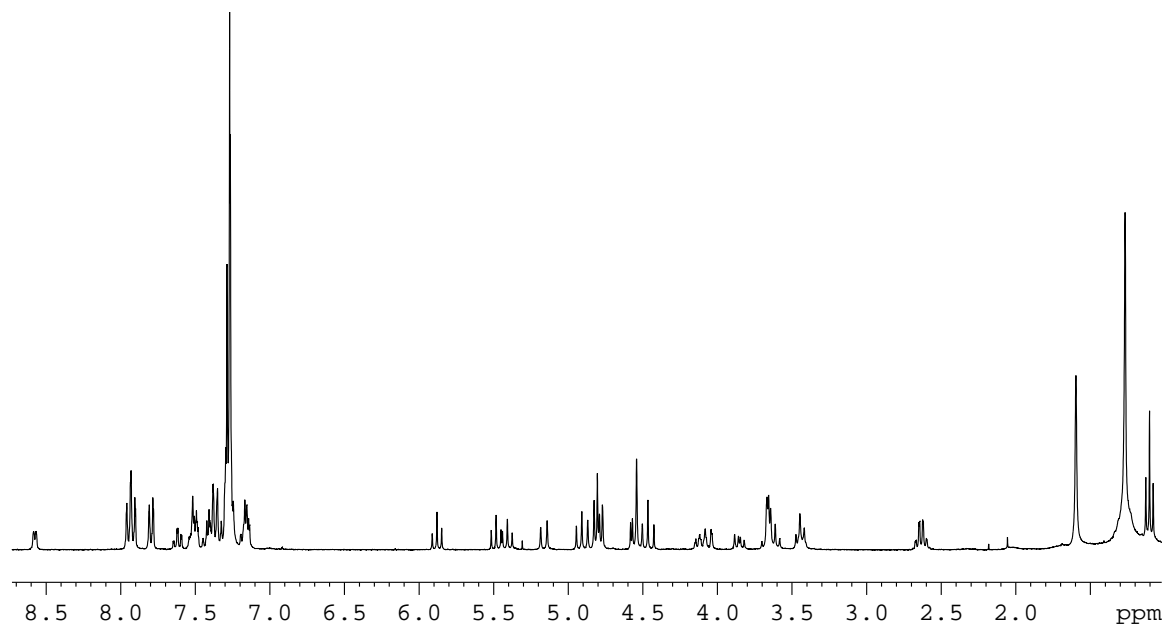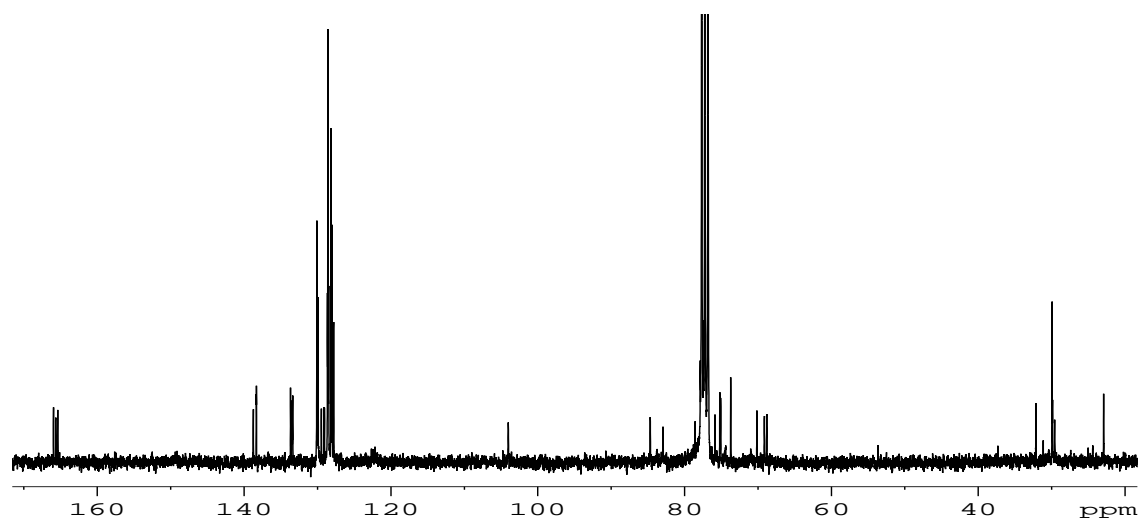

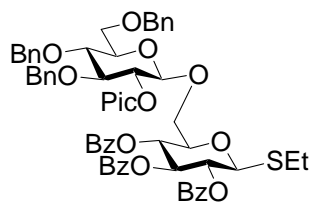

**28b**

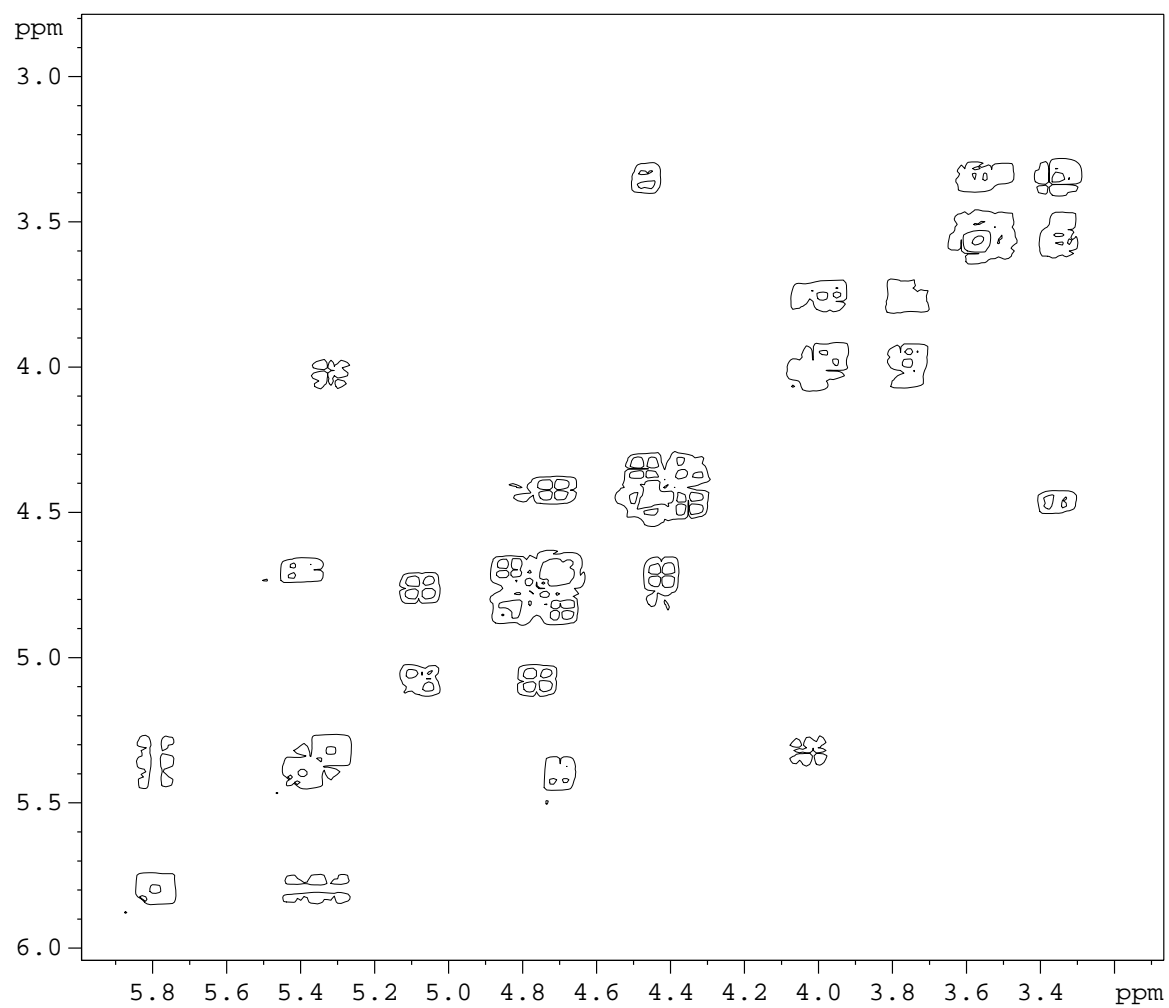

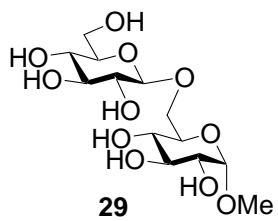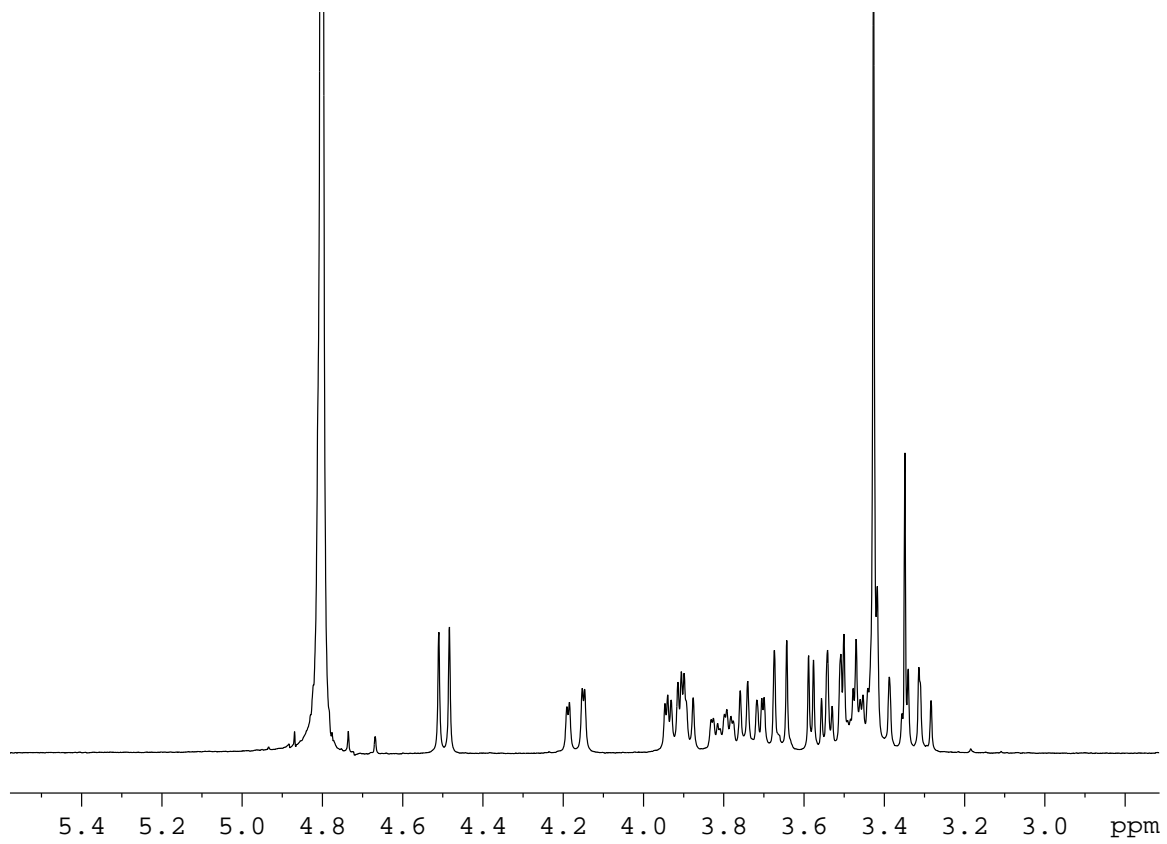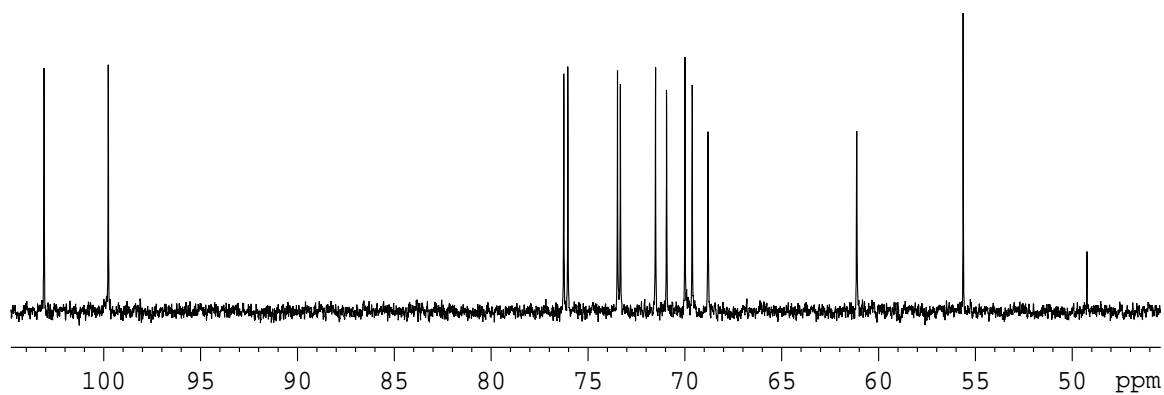

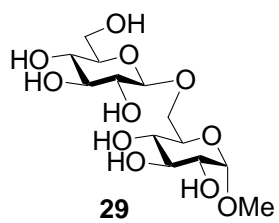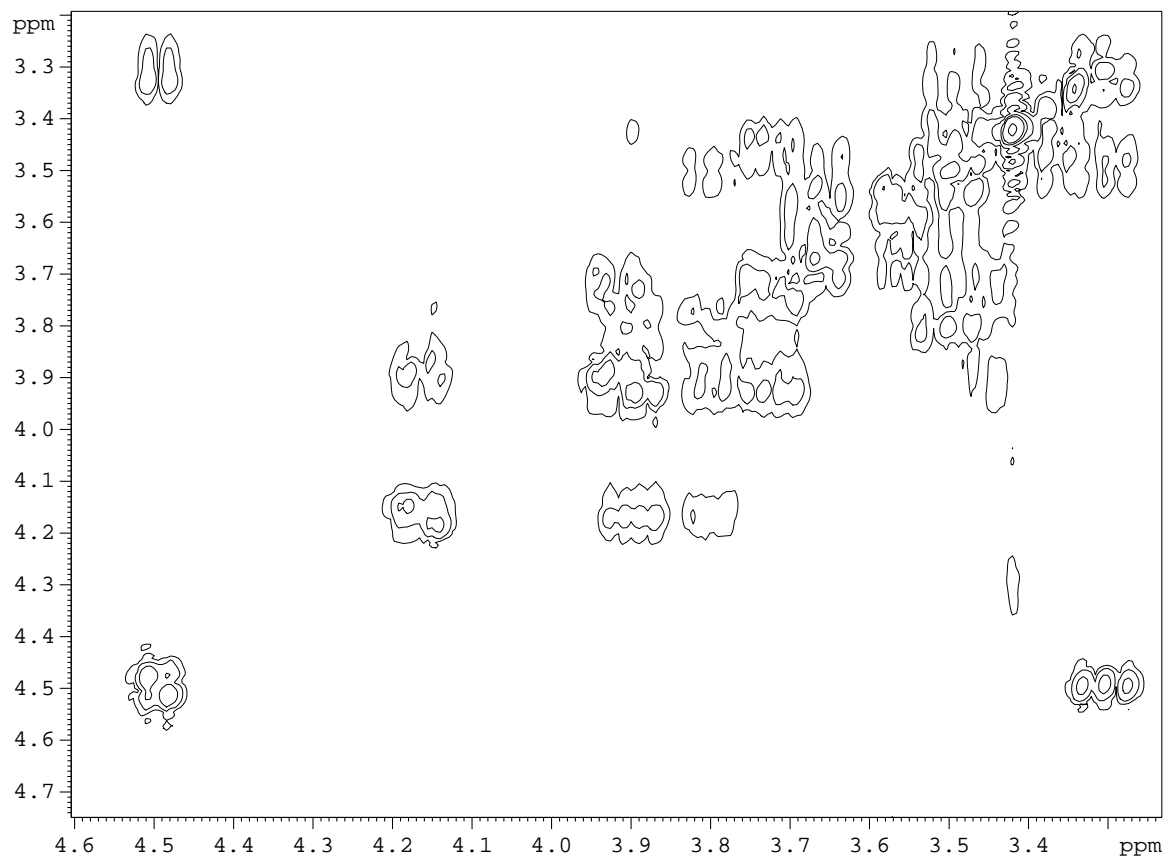

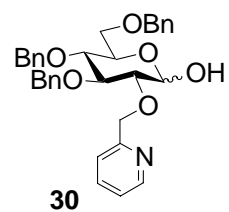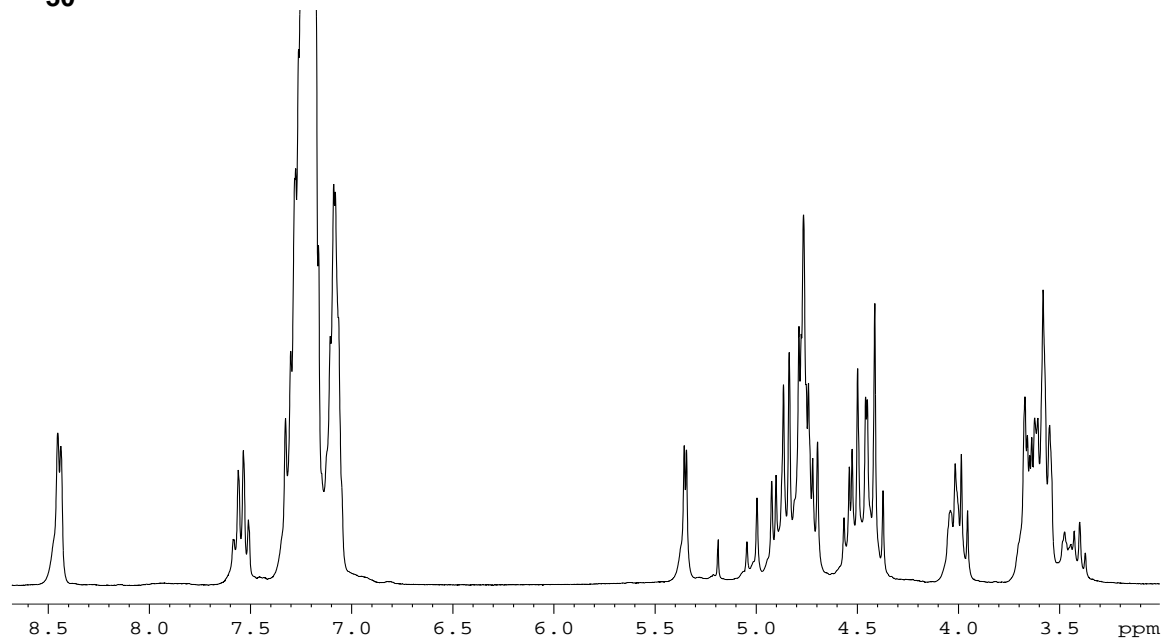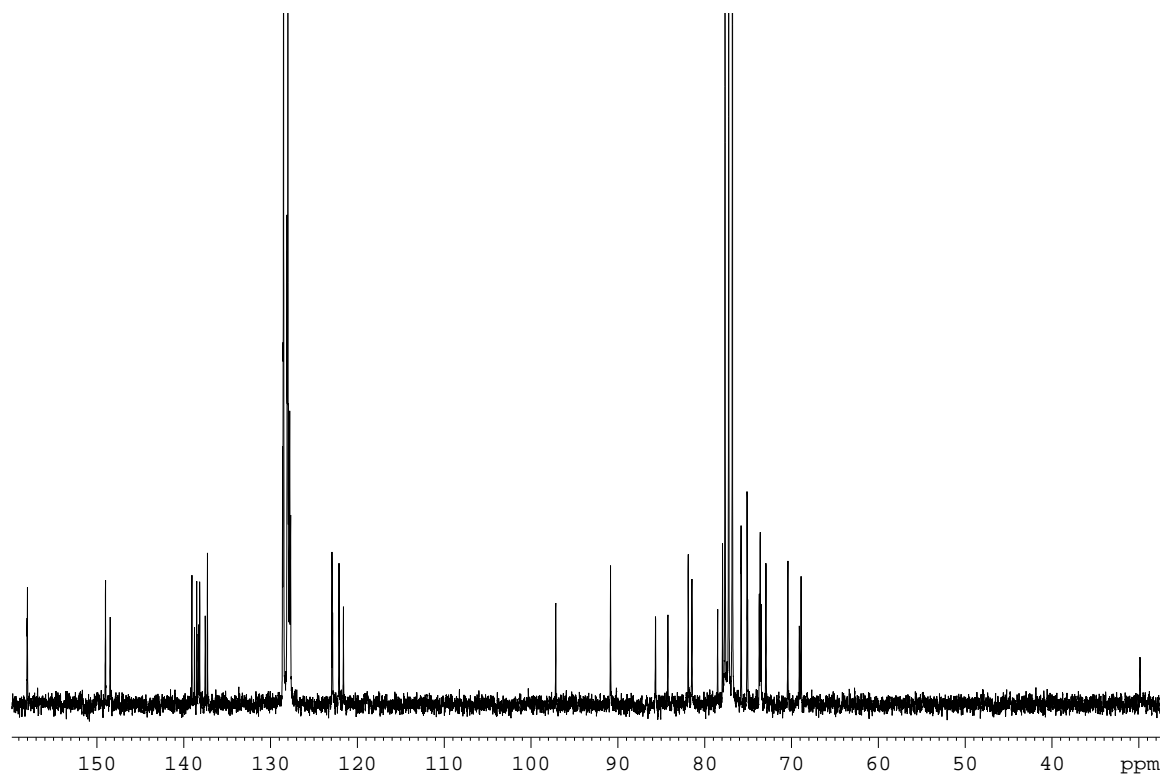

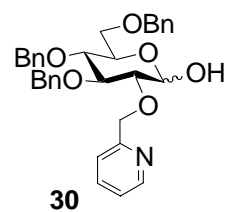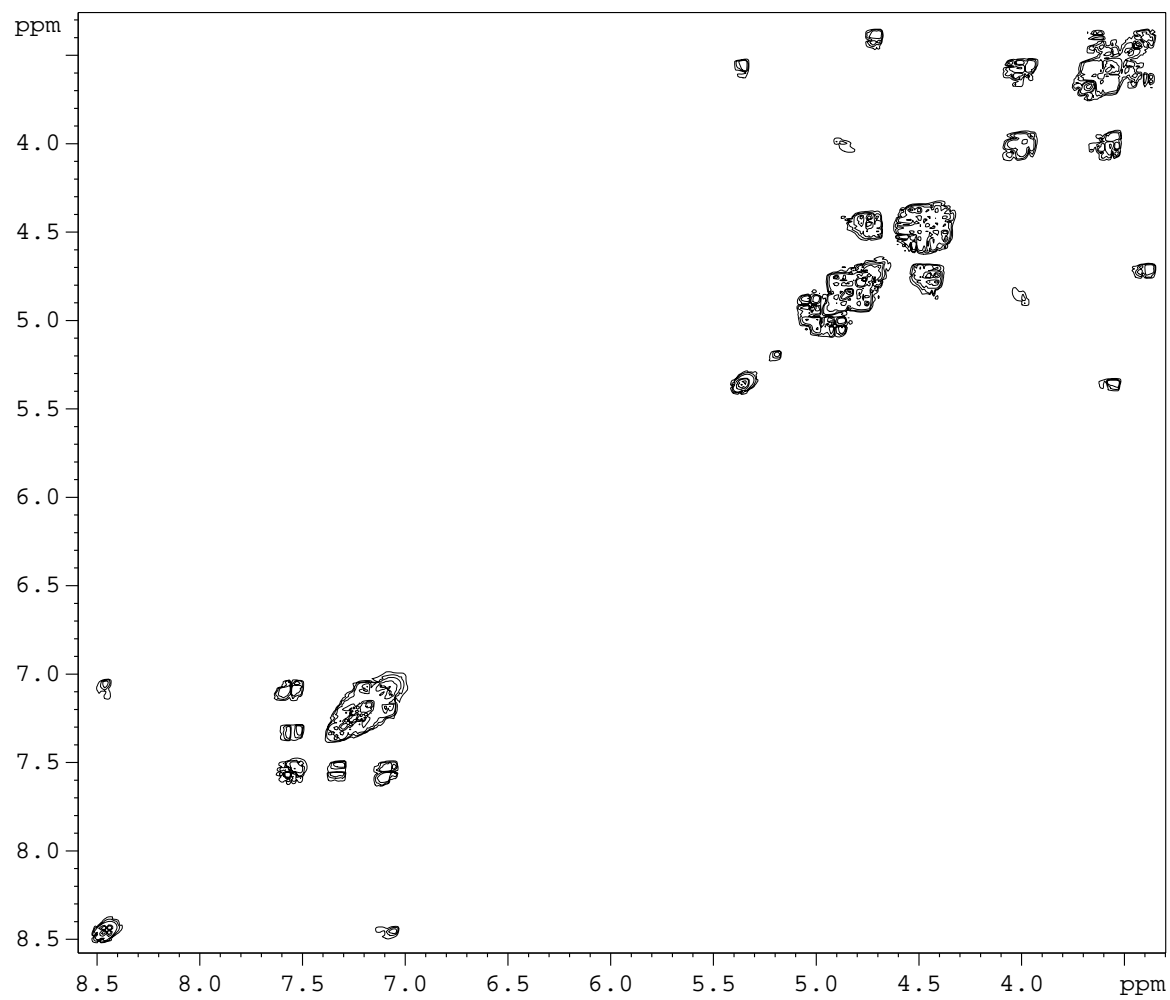



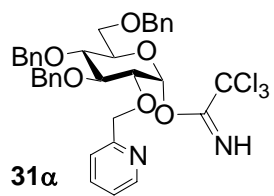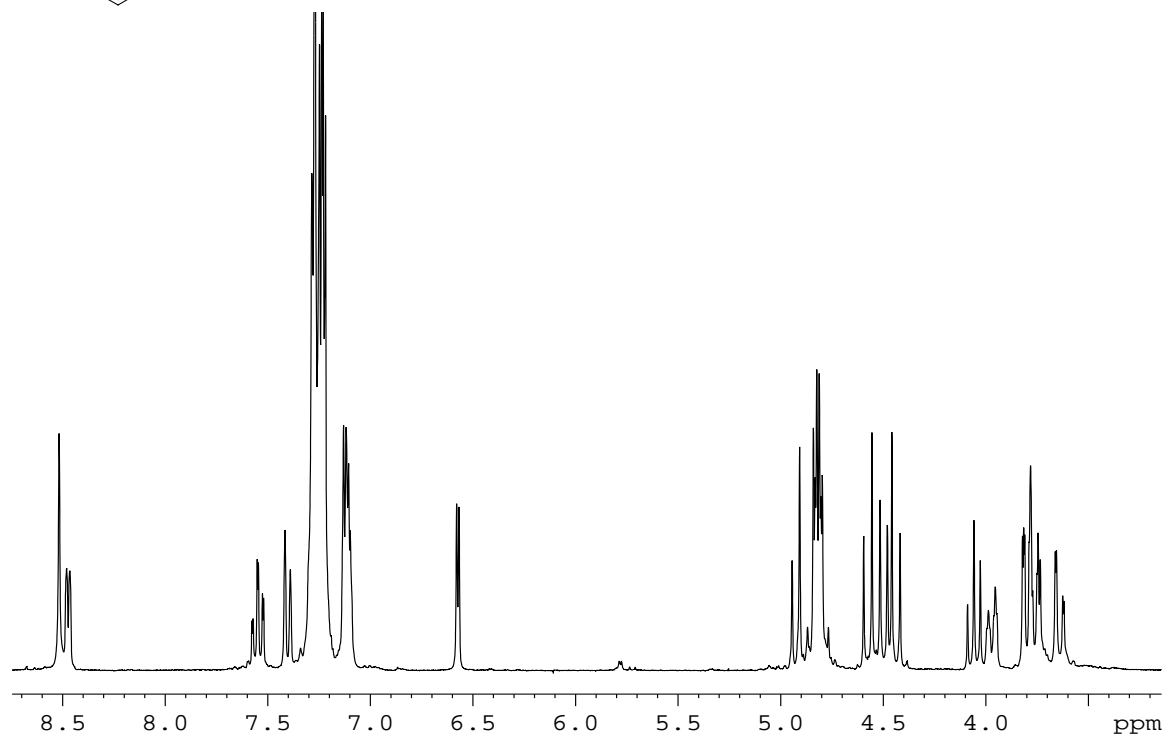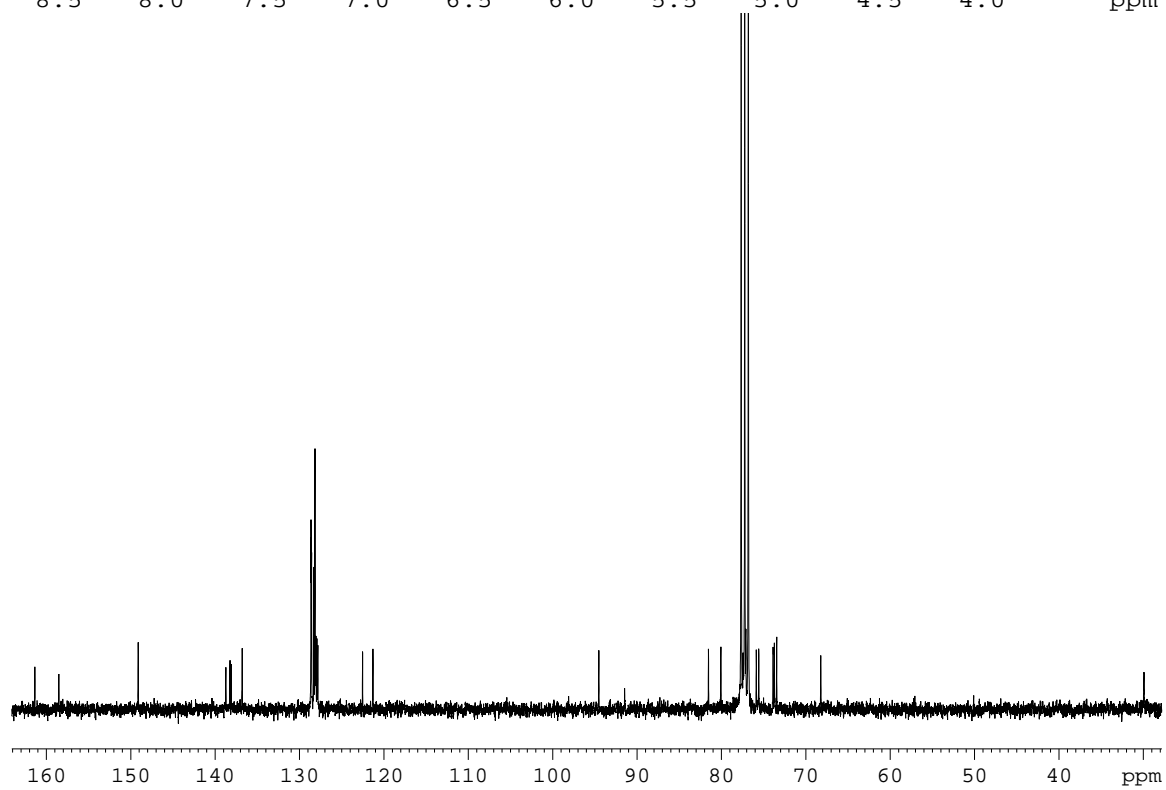

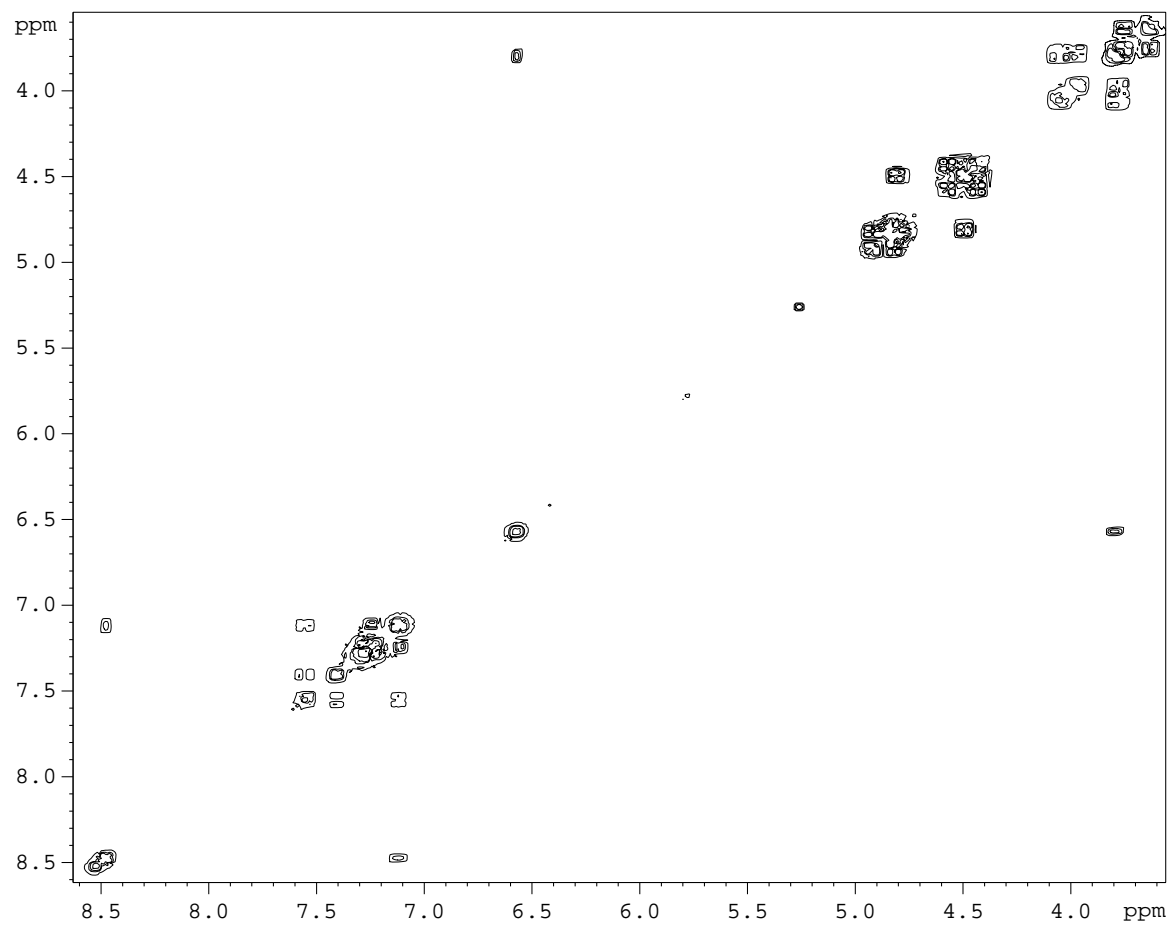

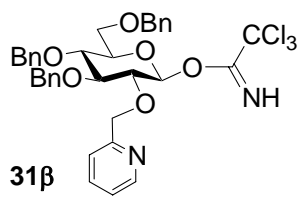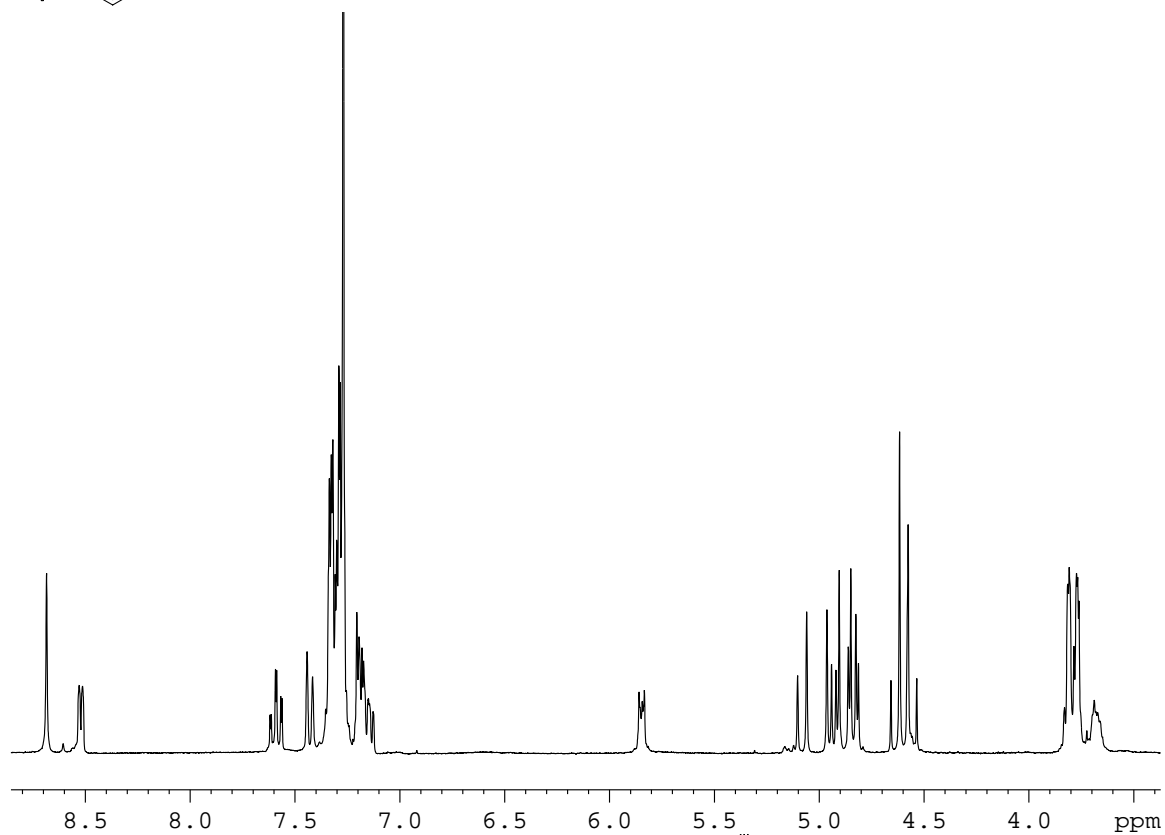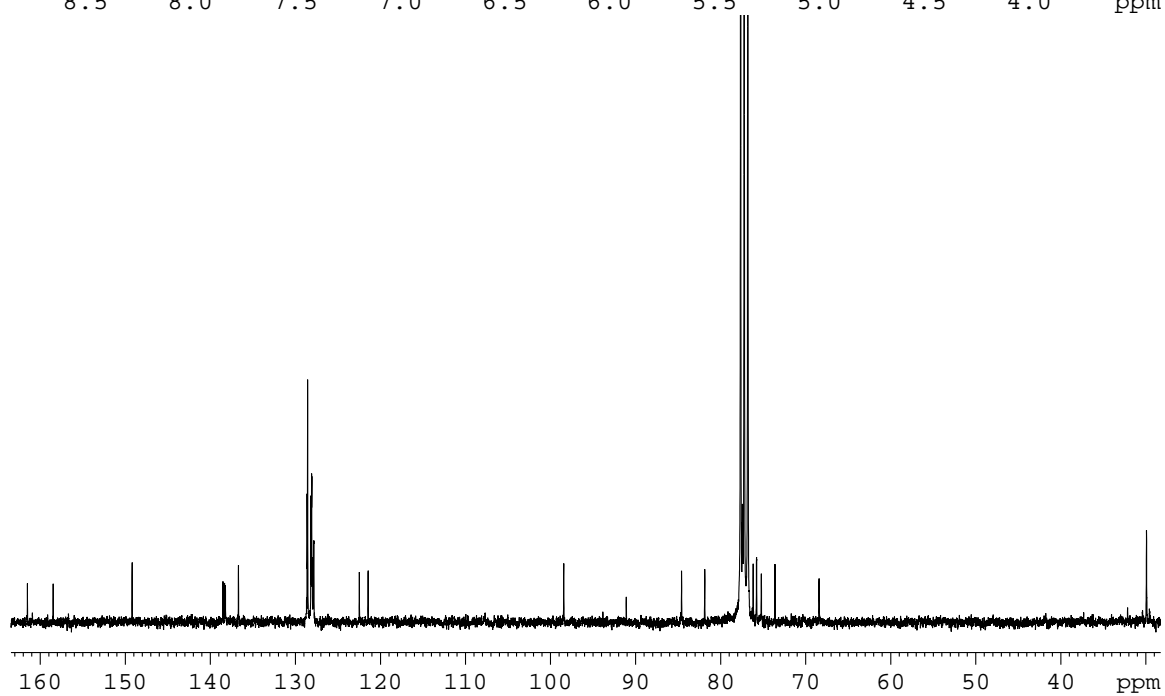

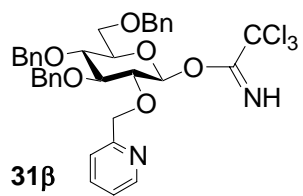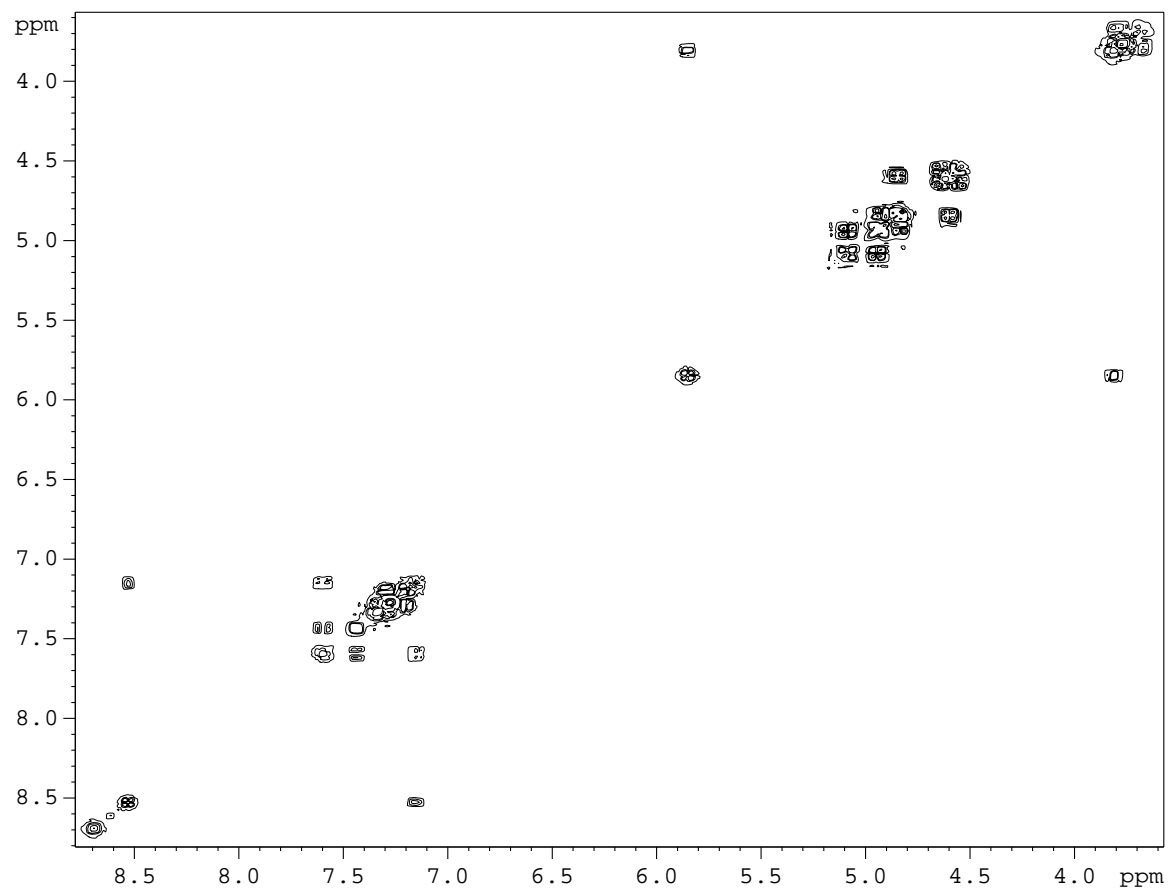

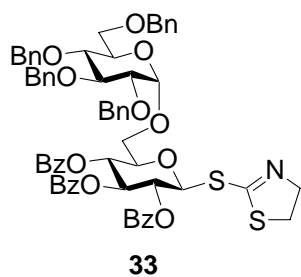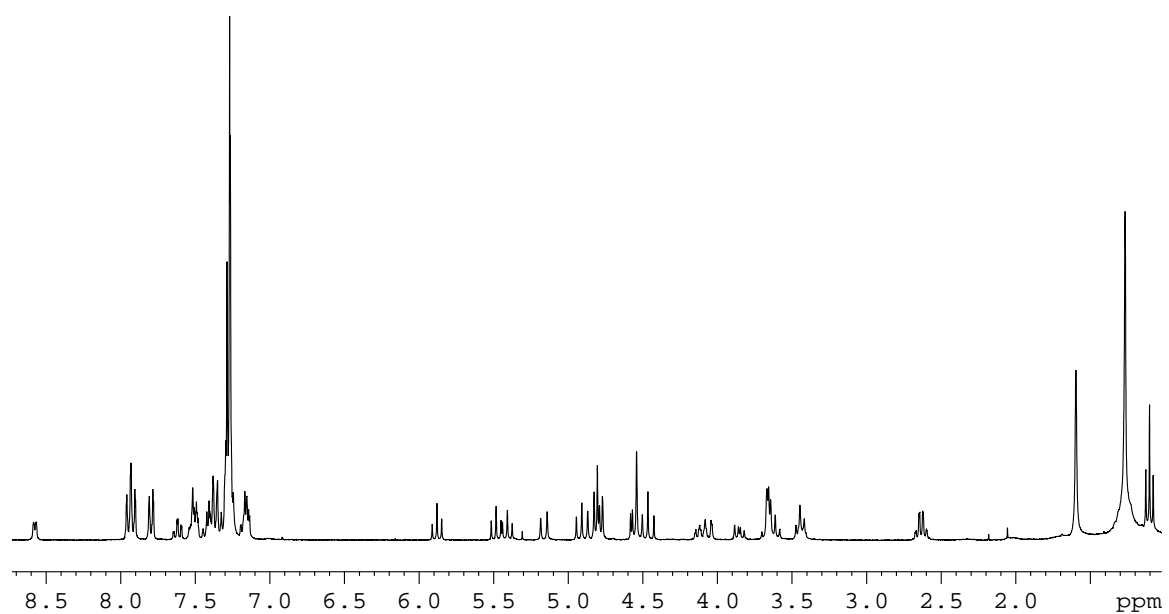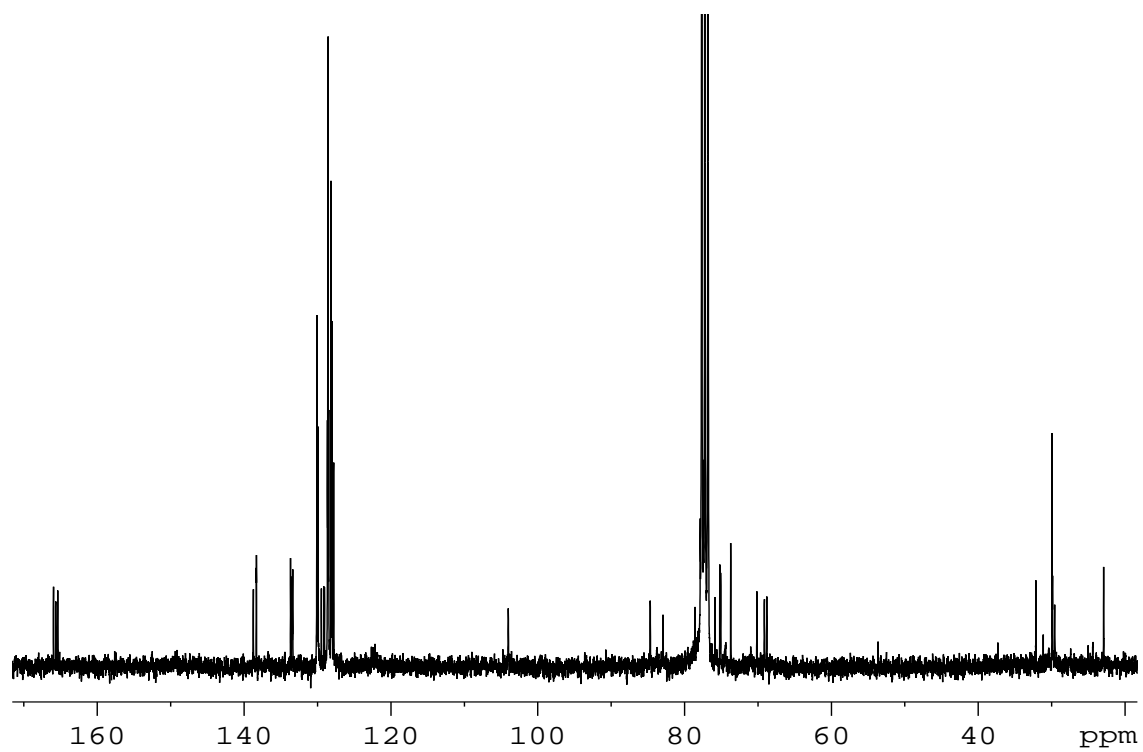

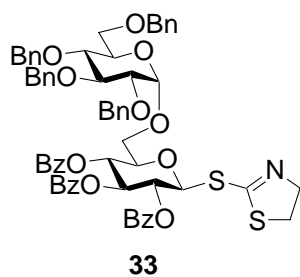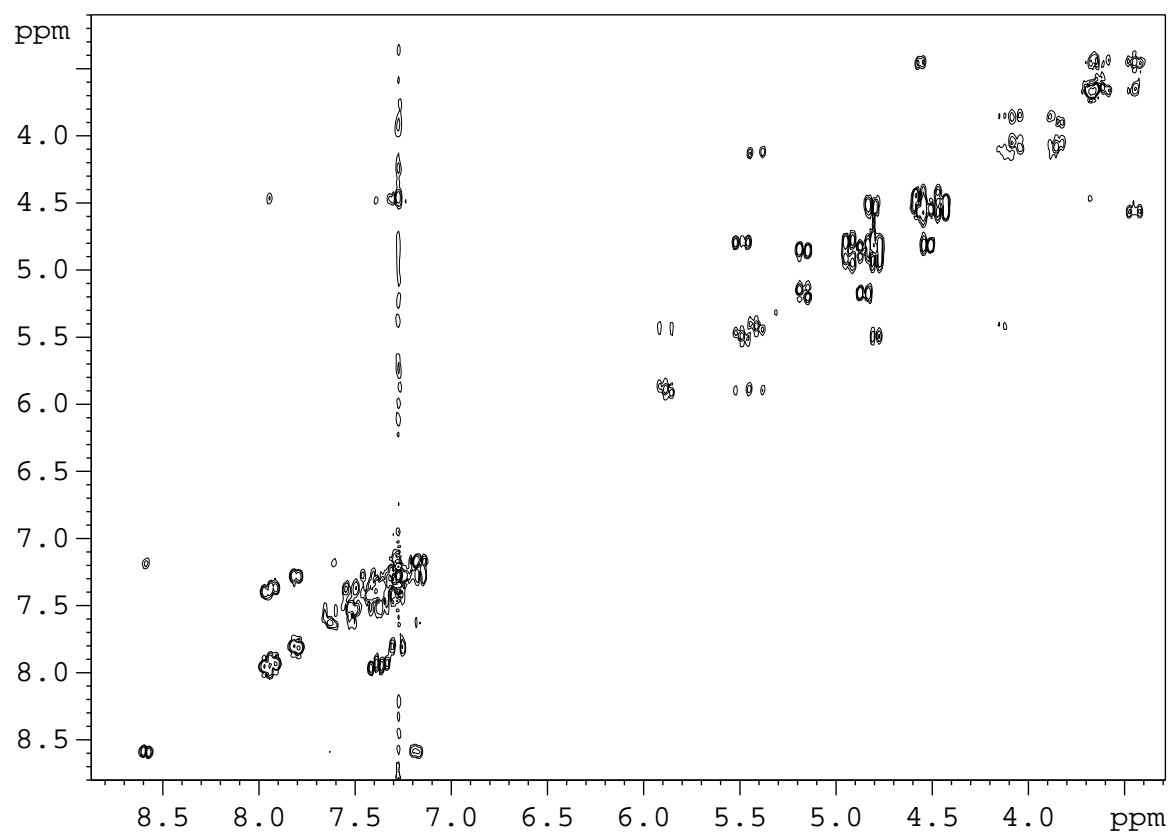

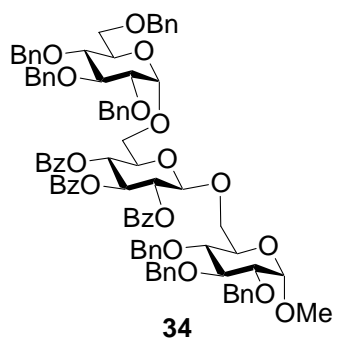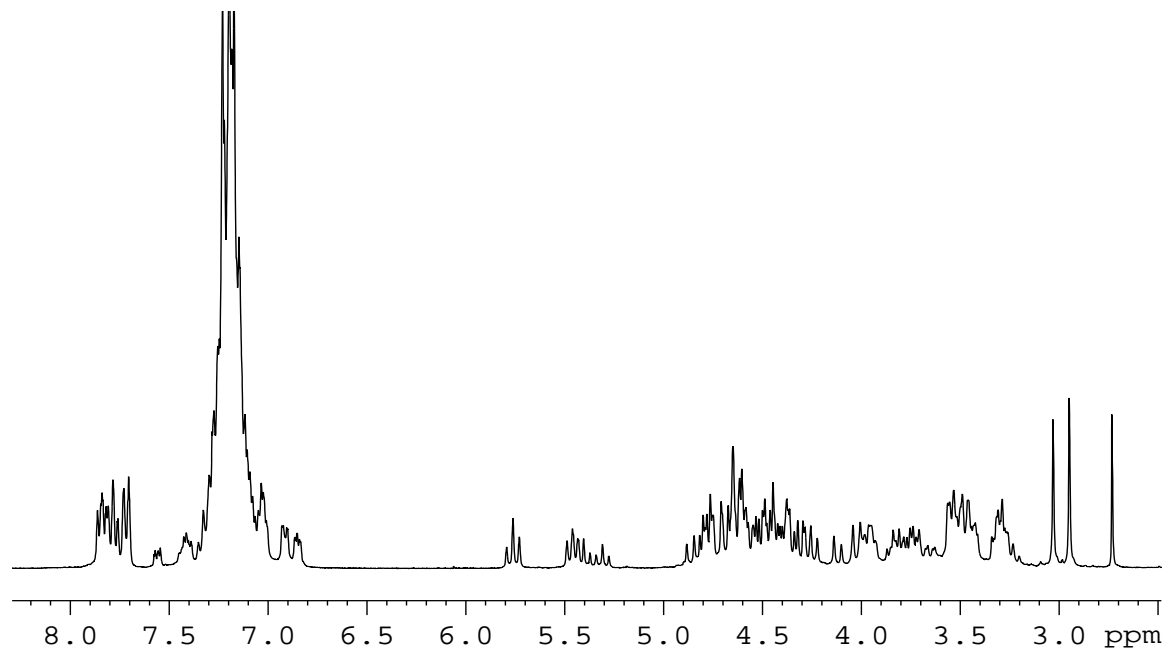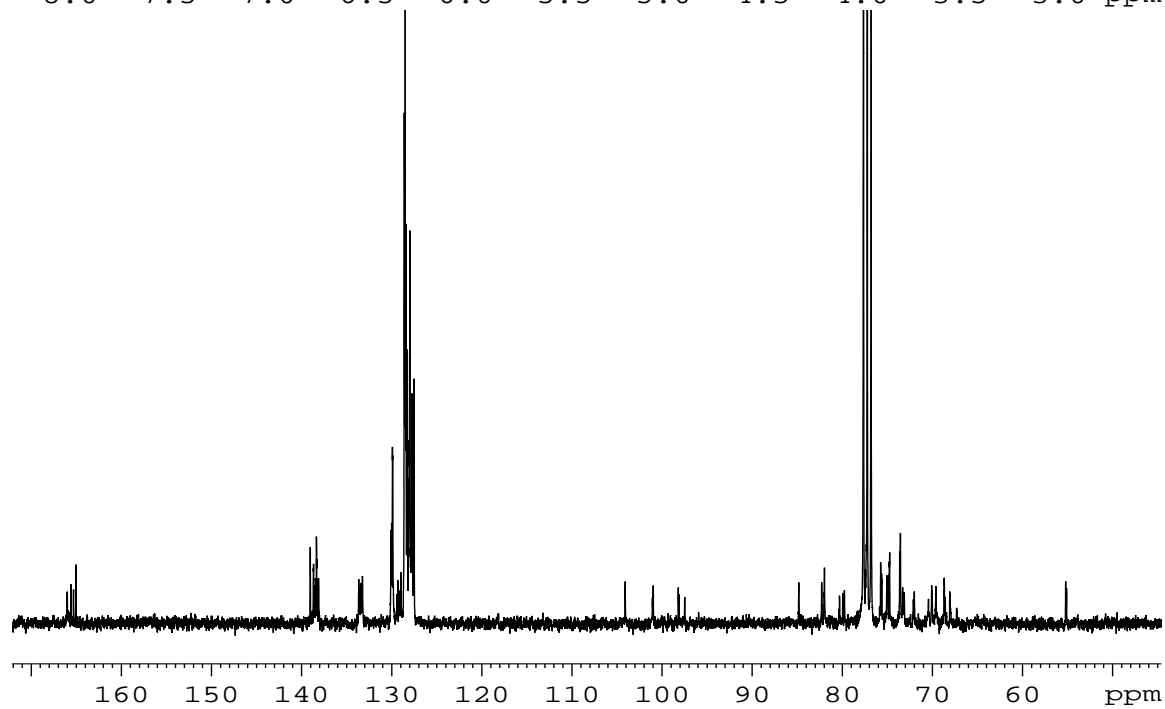

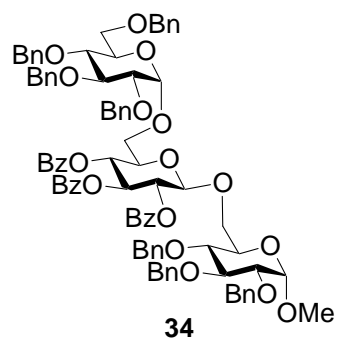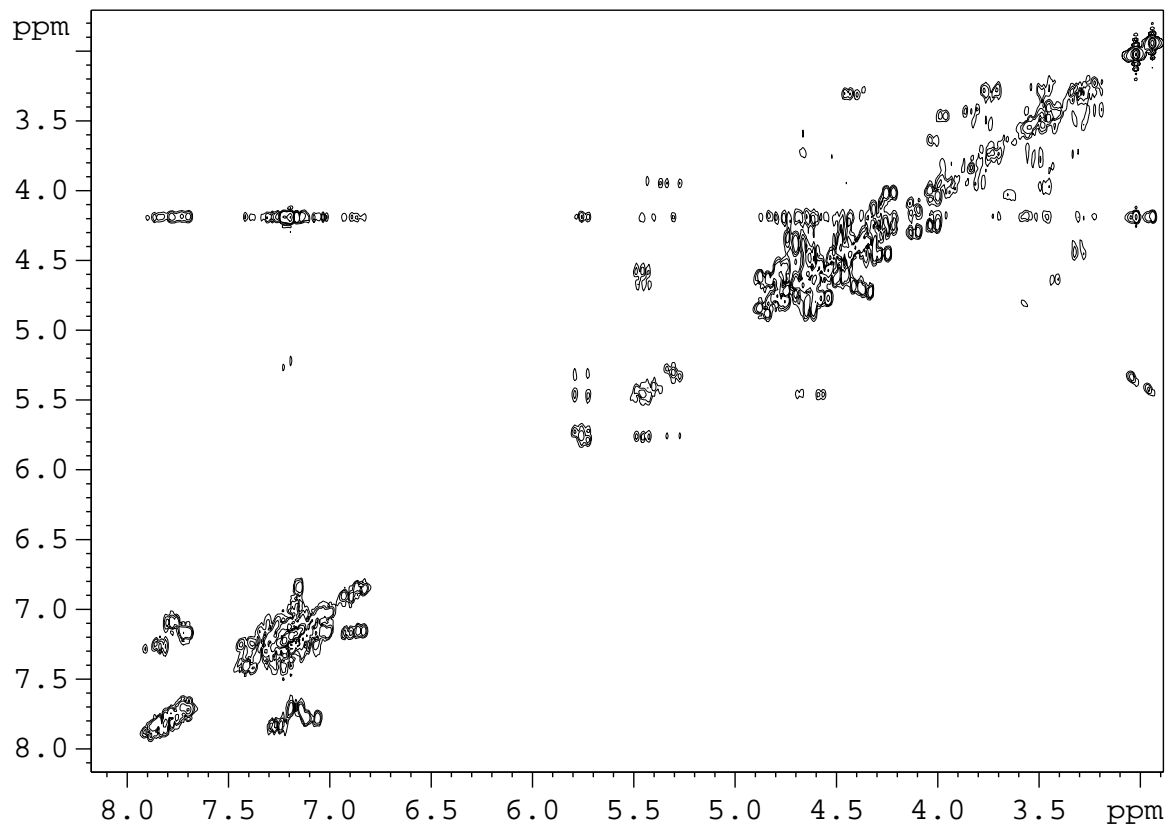



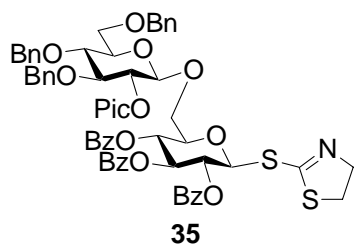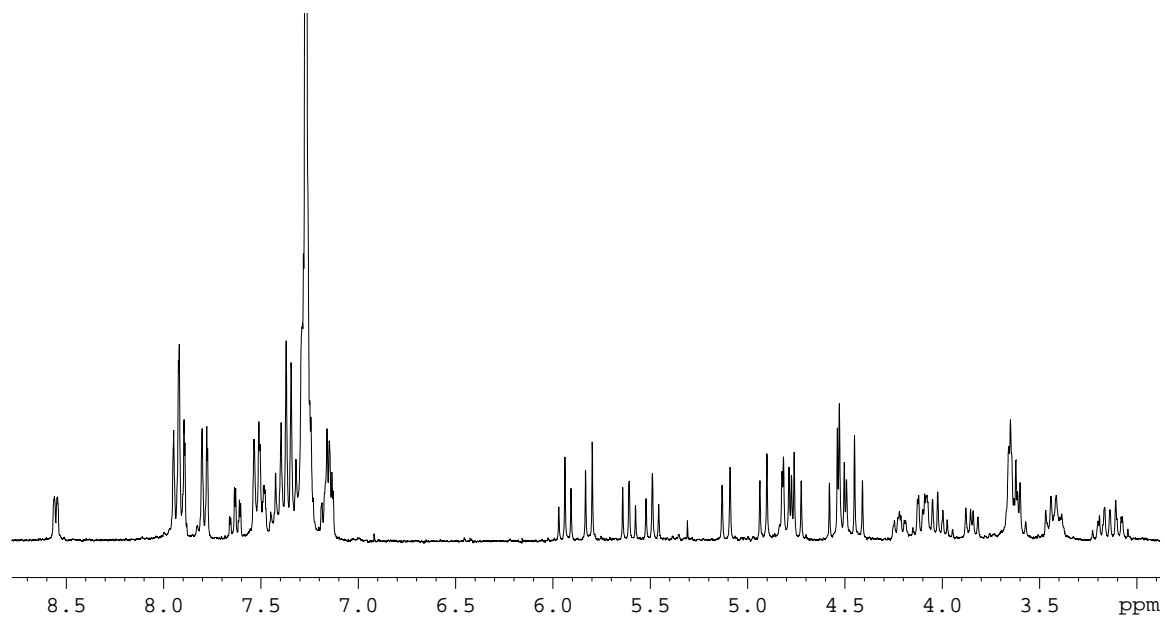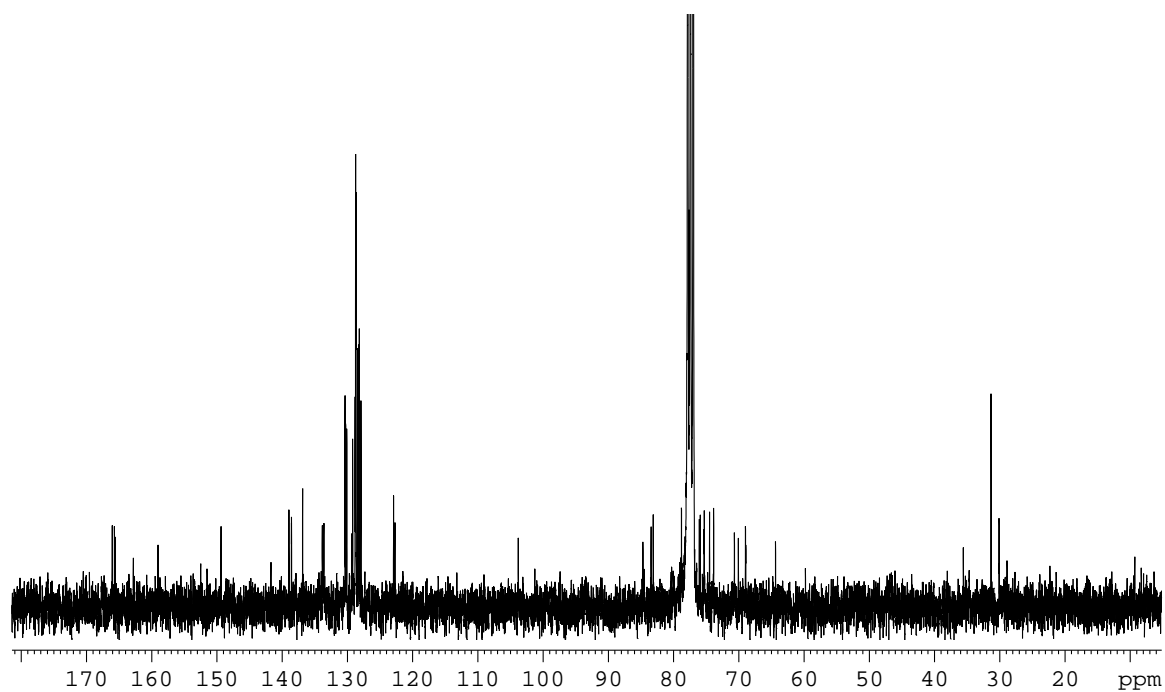

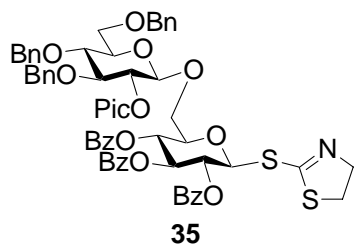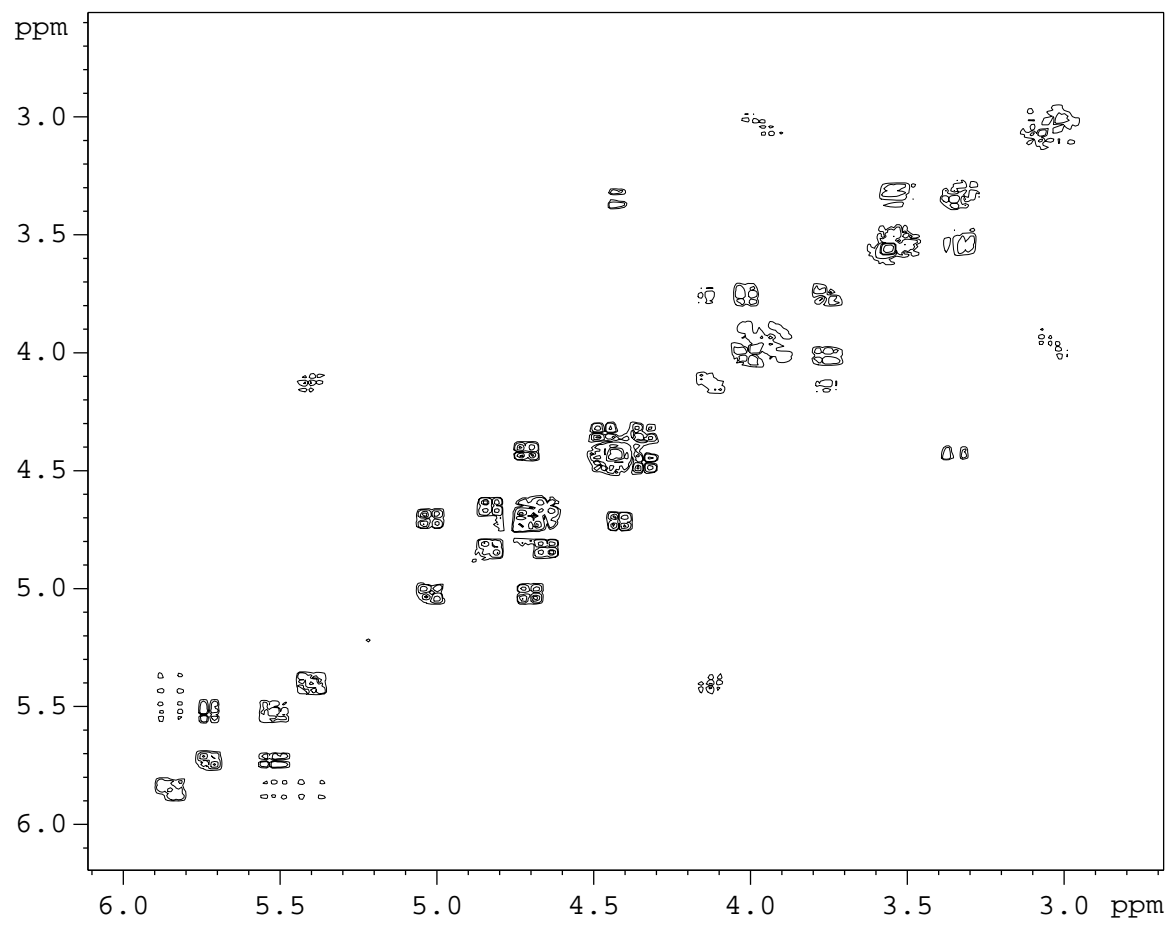

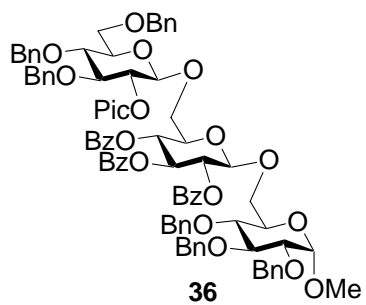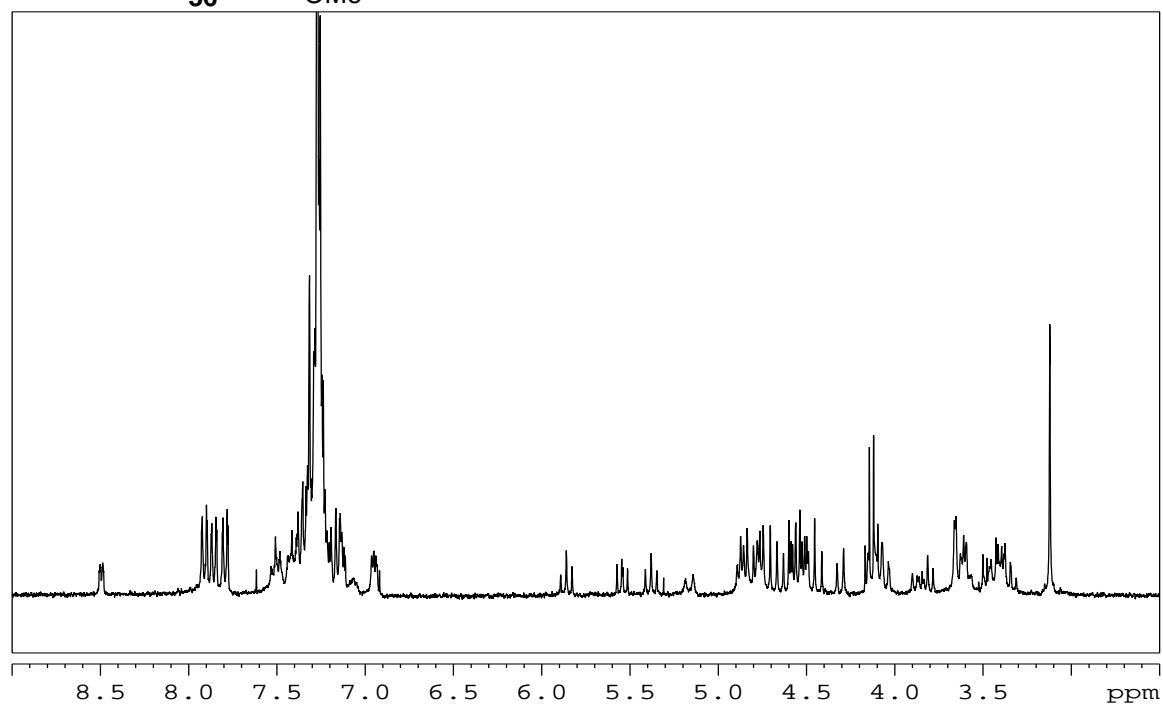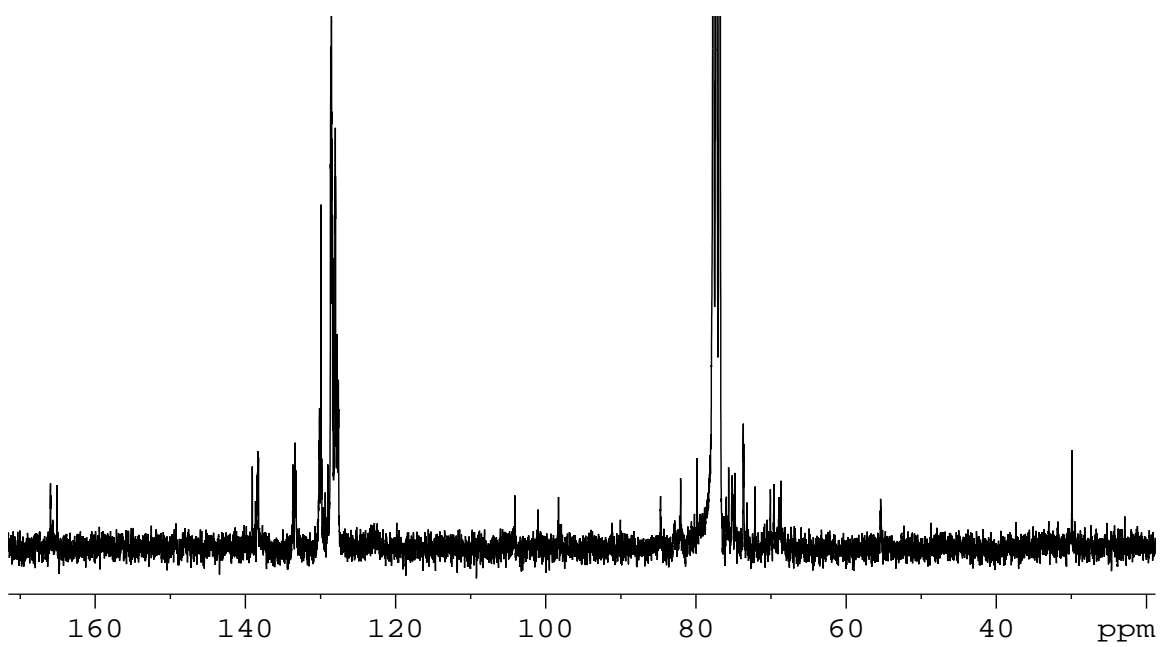



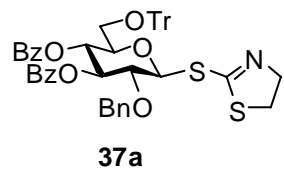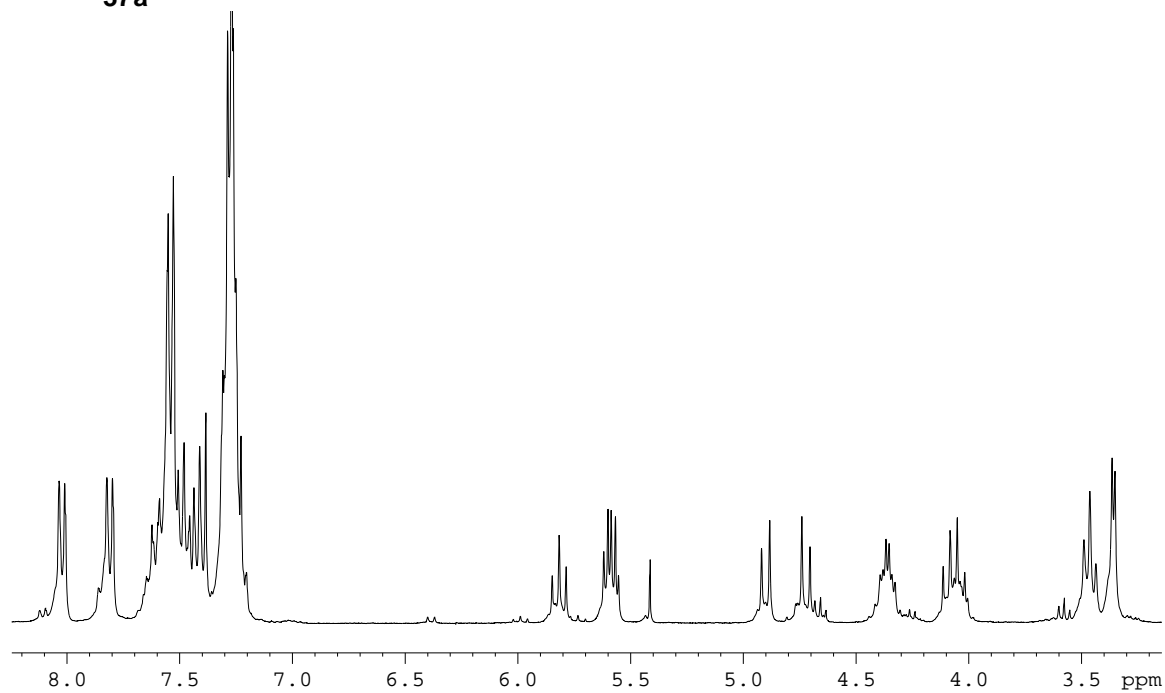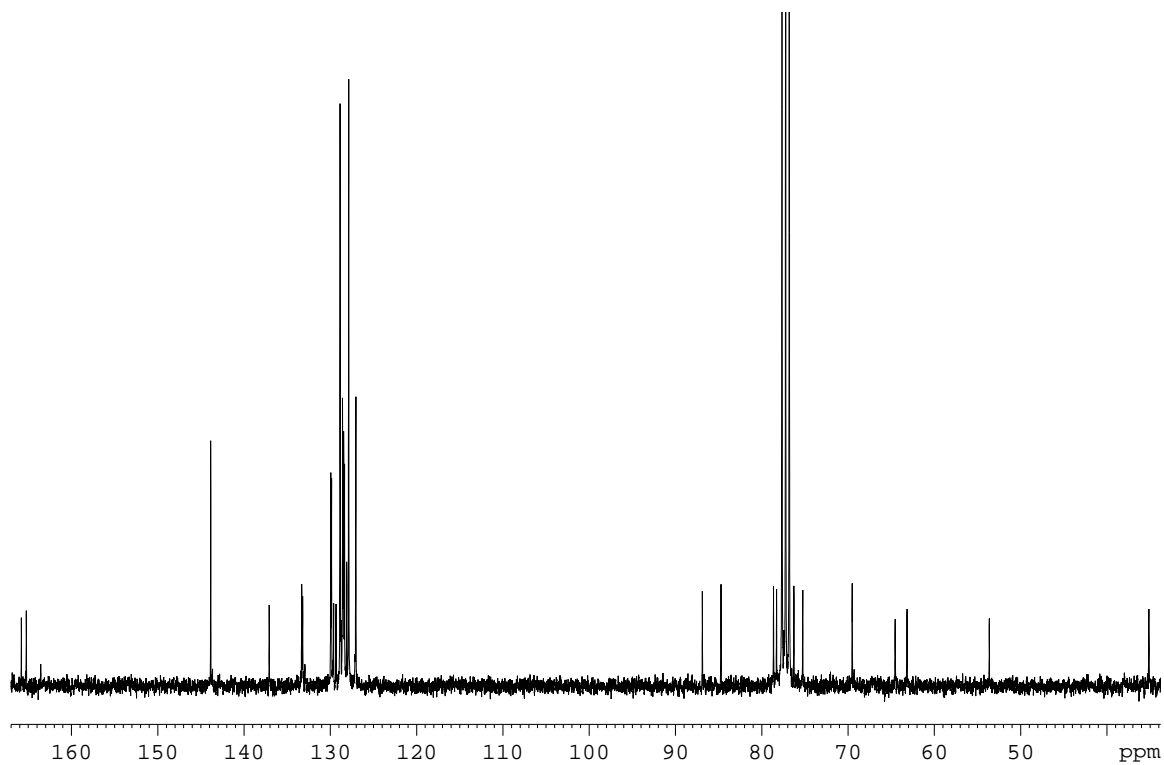

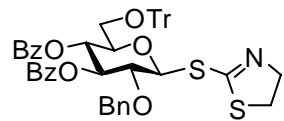

**37a**

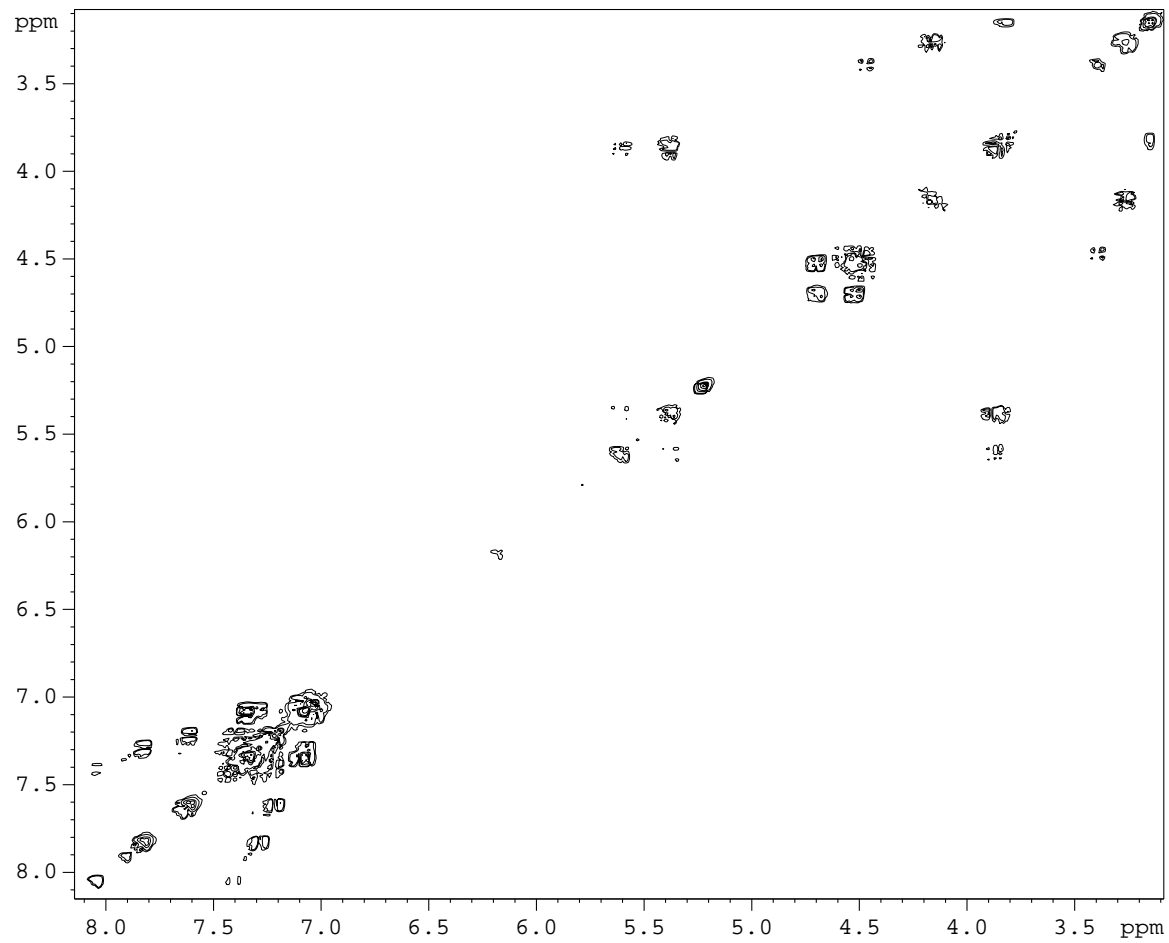

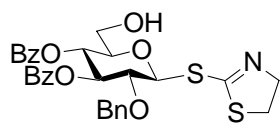

38

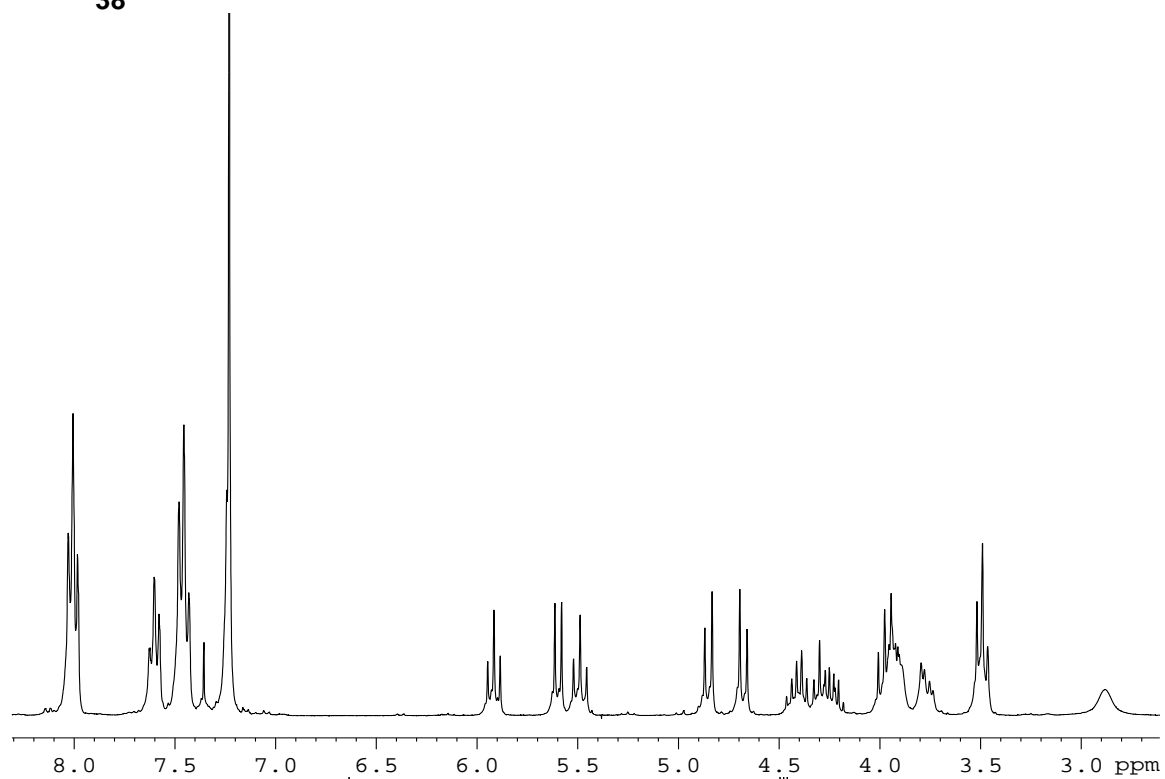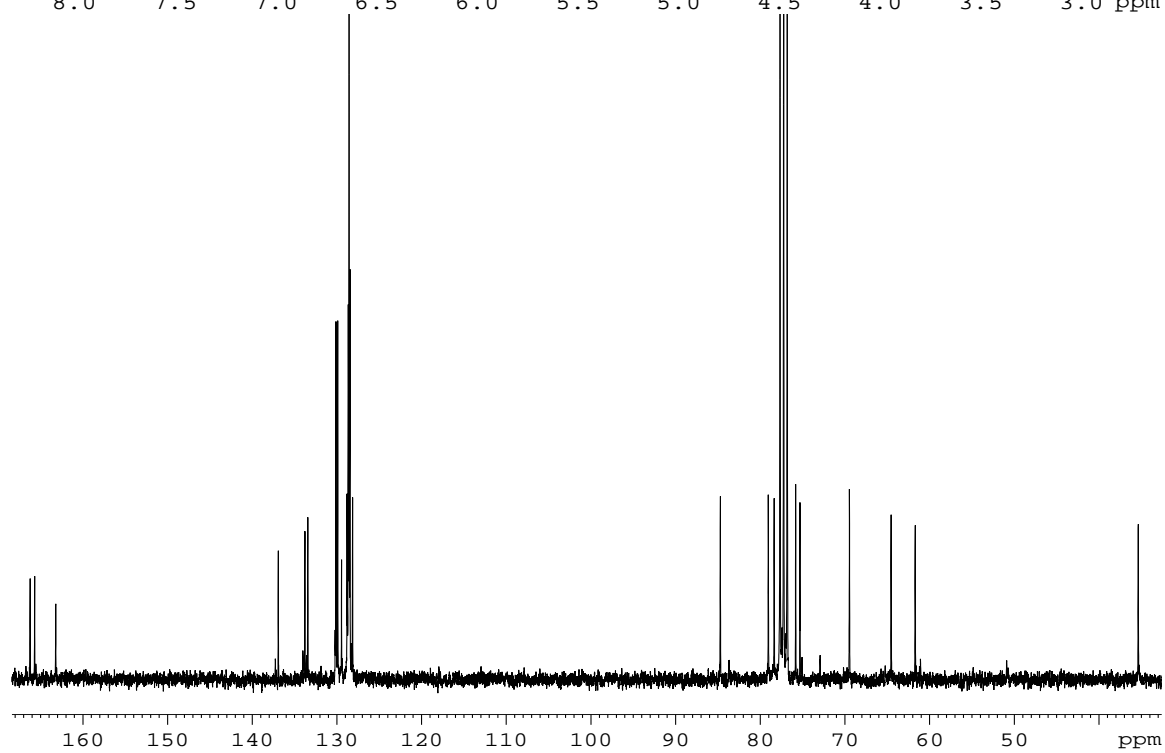



**38**

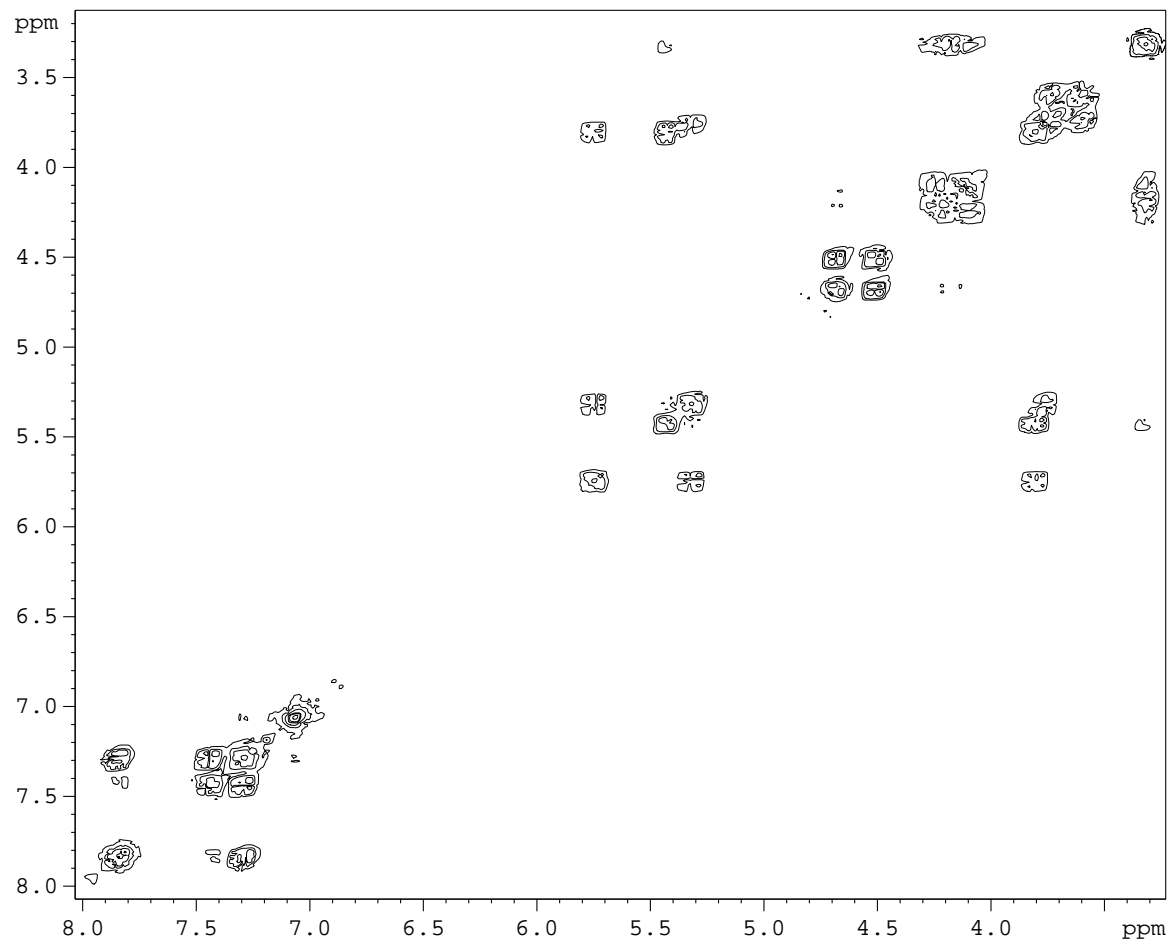



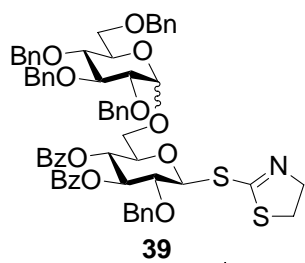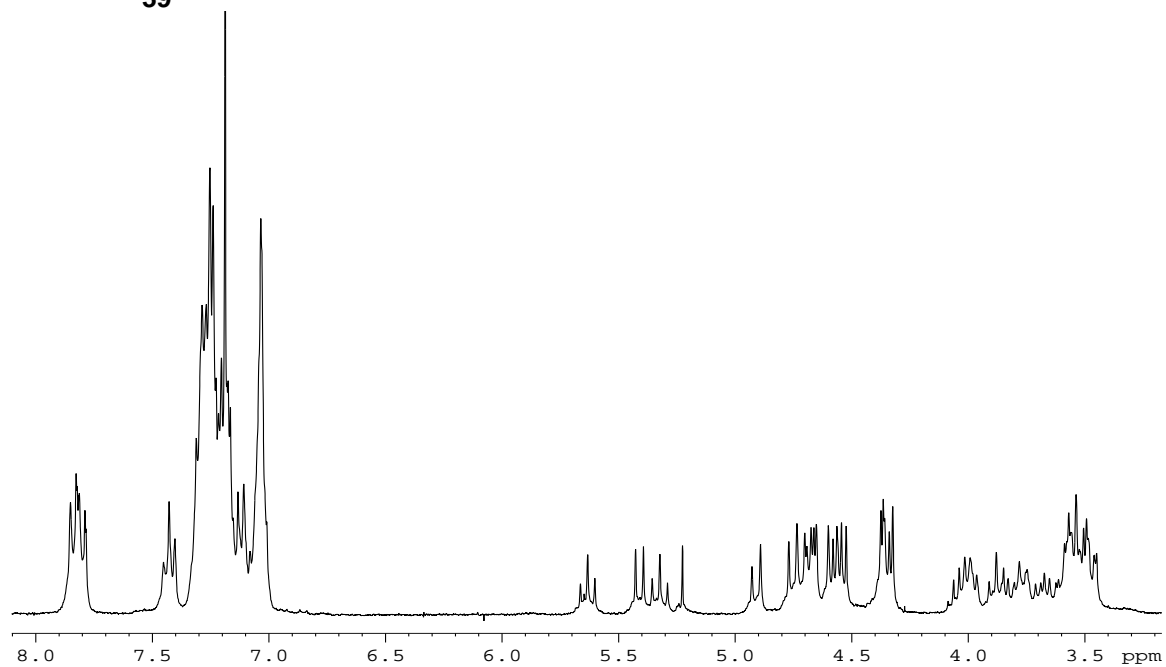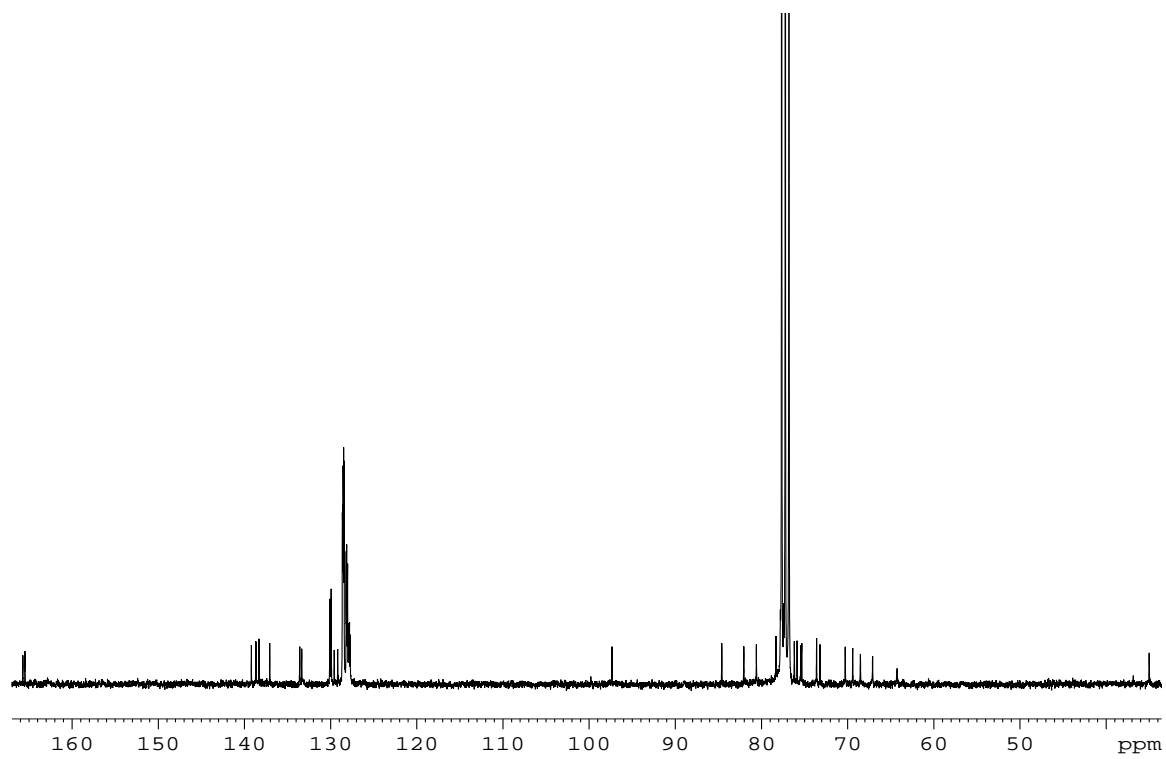

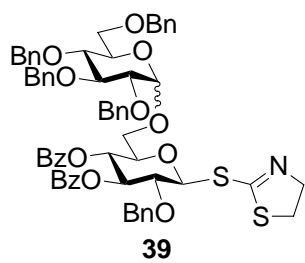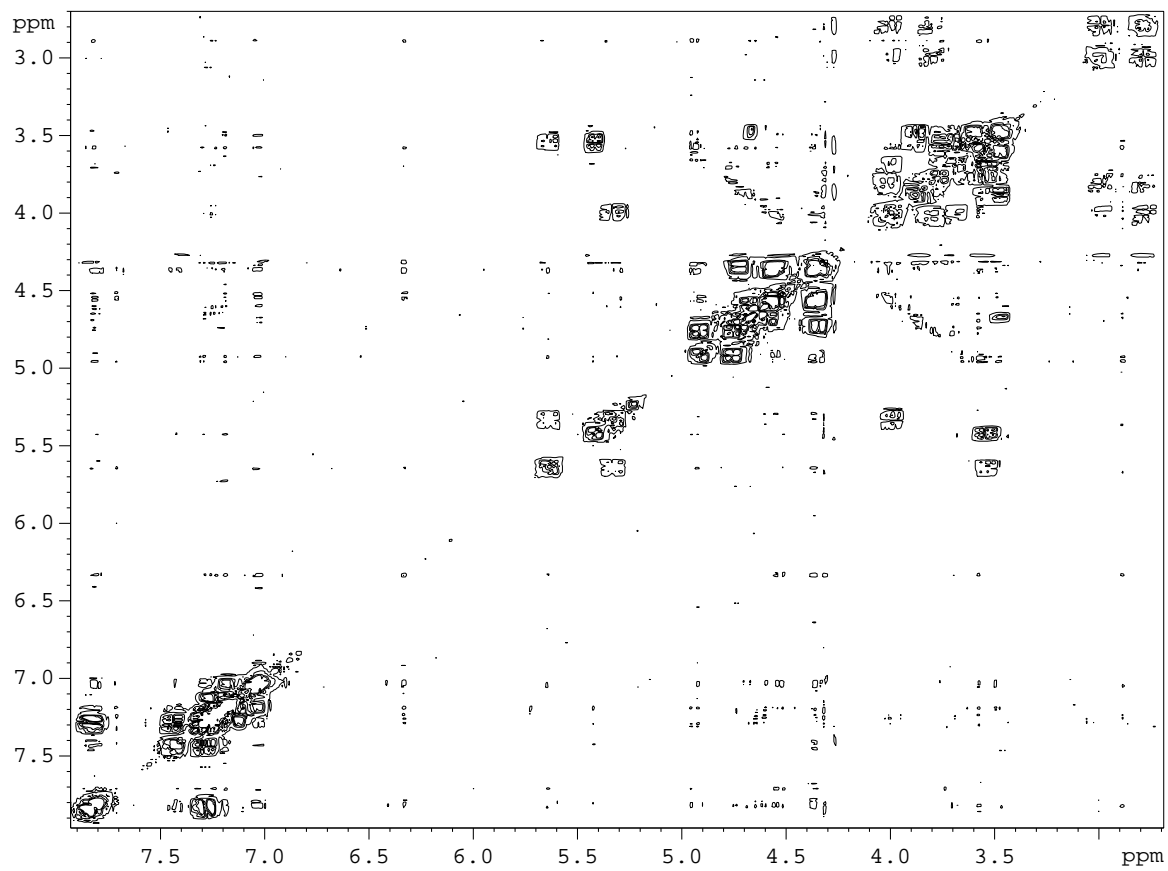

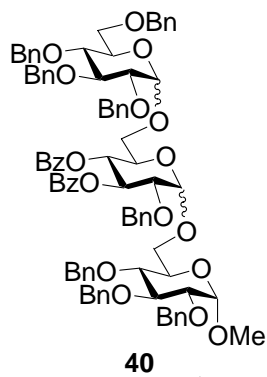

40

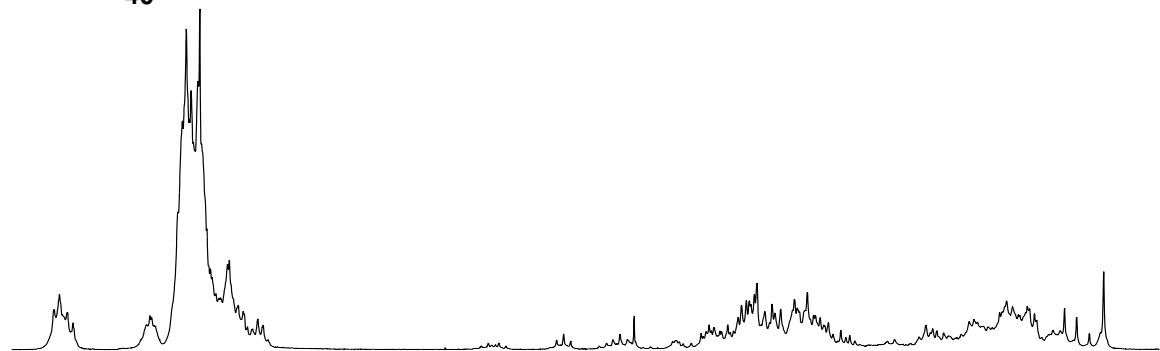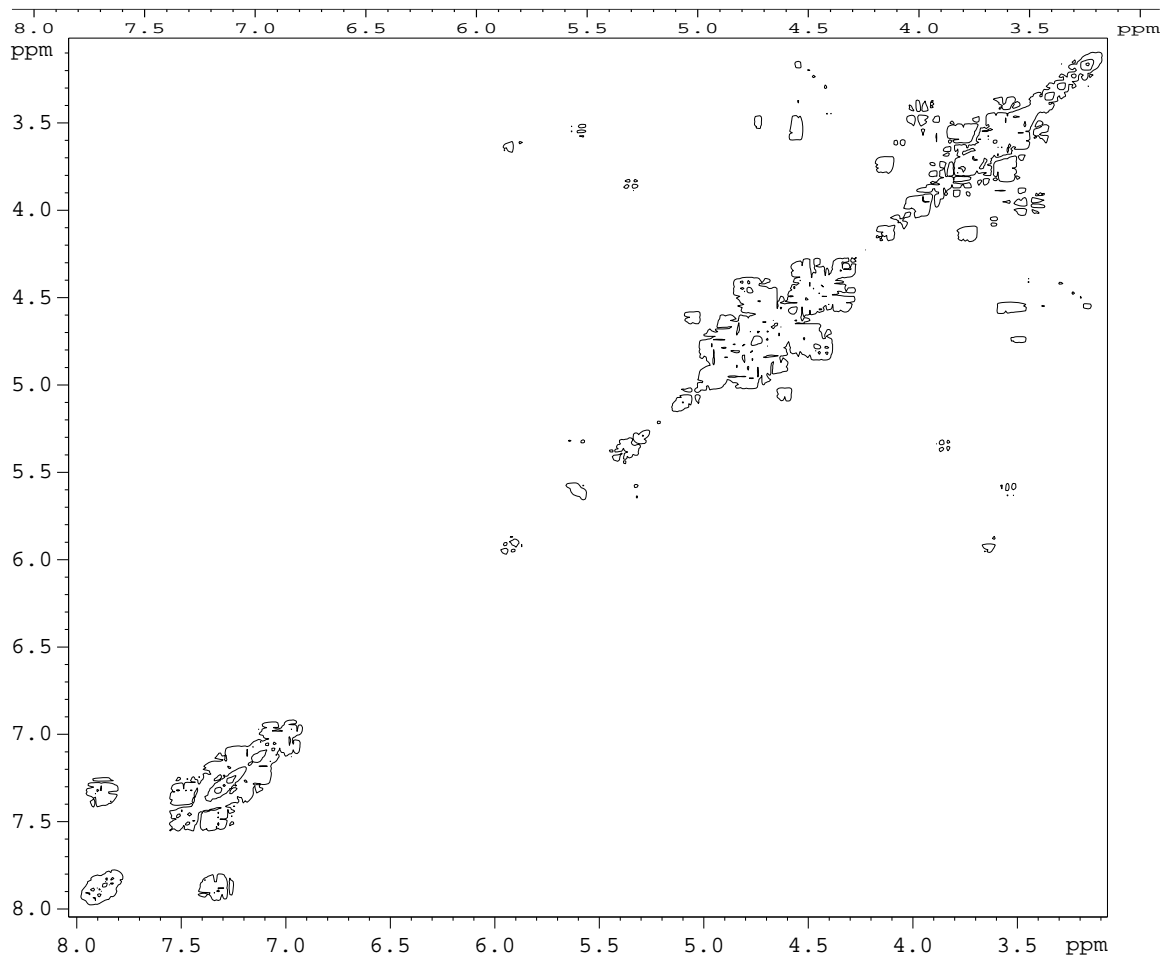

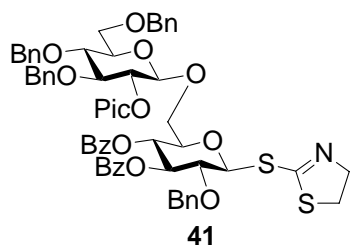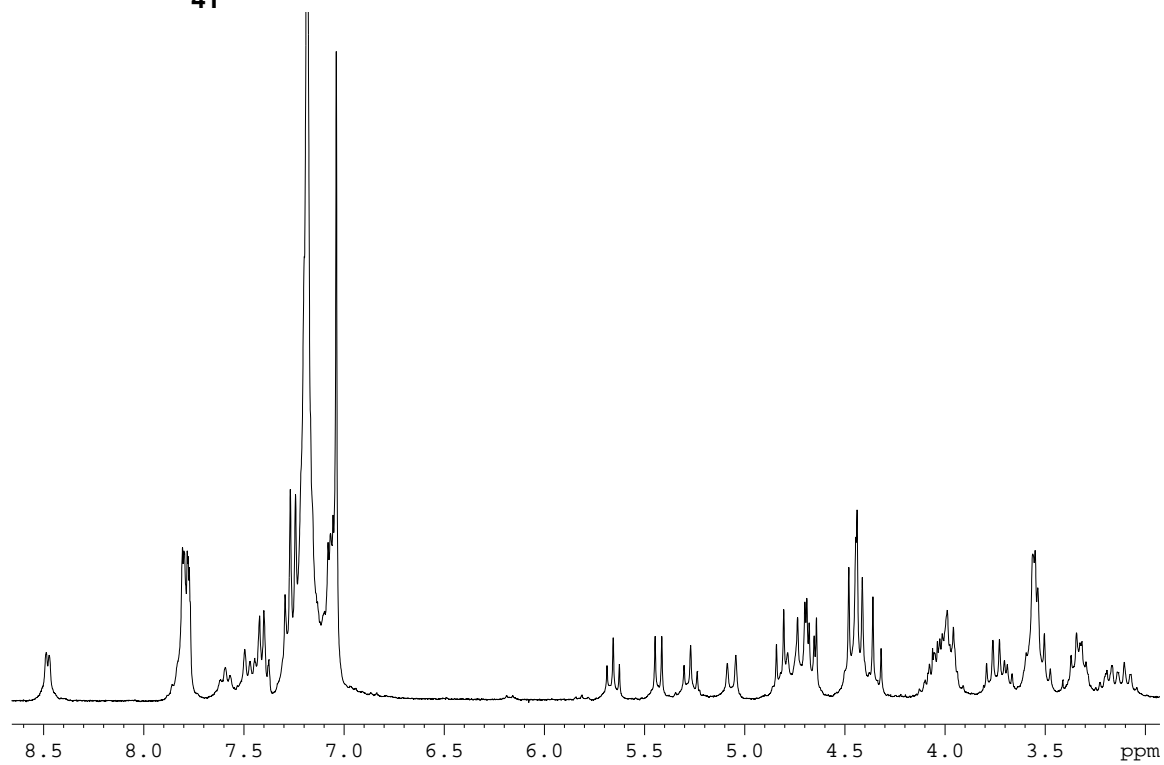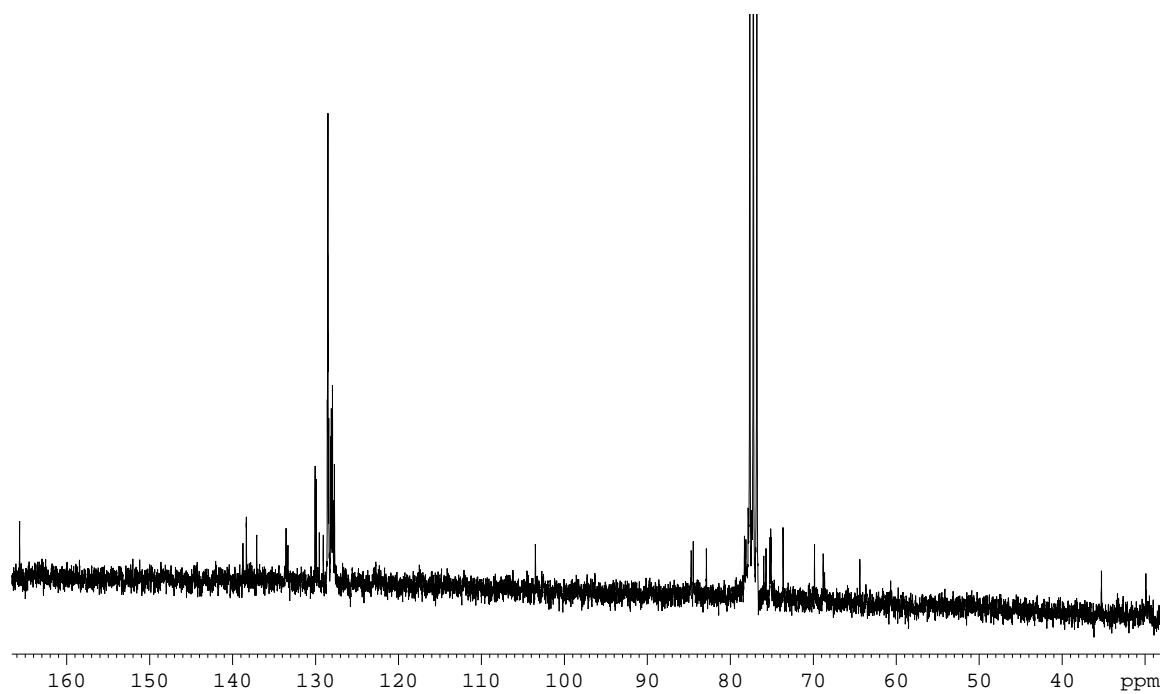

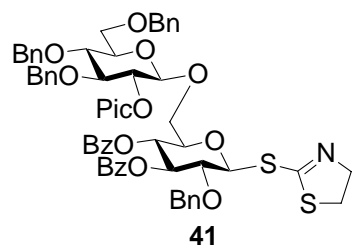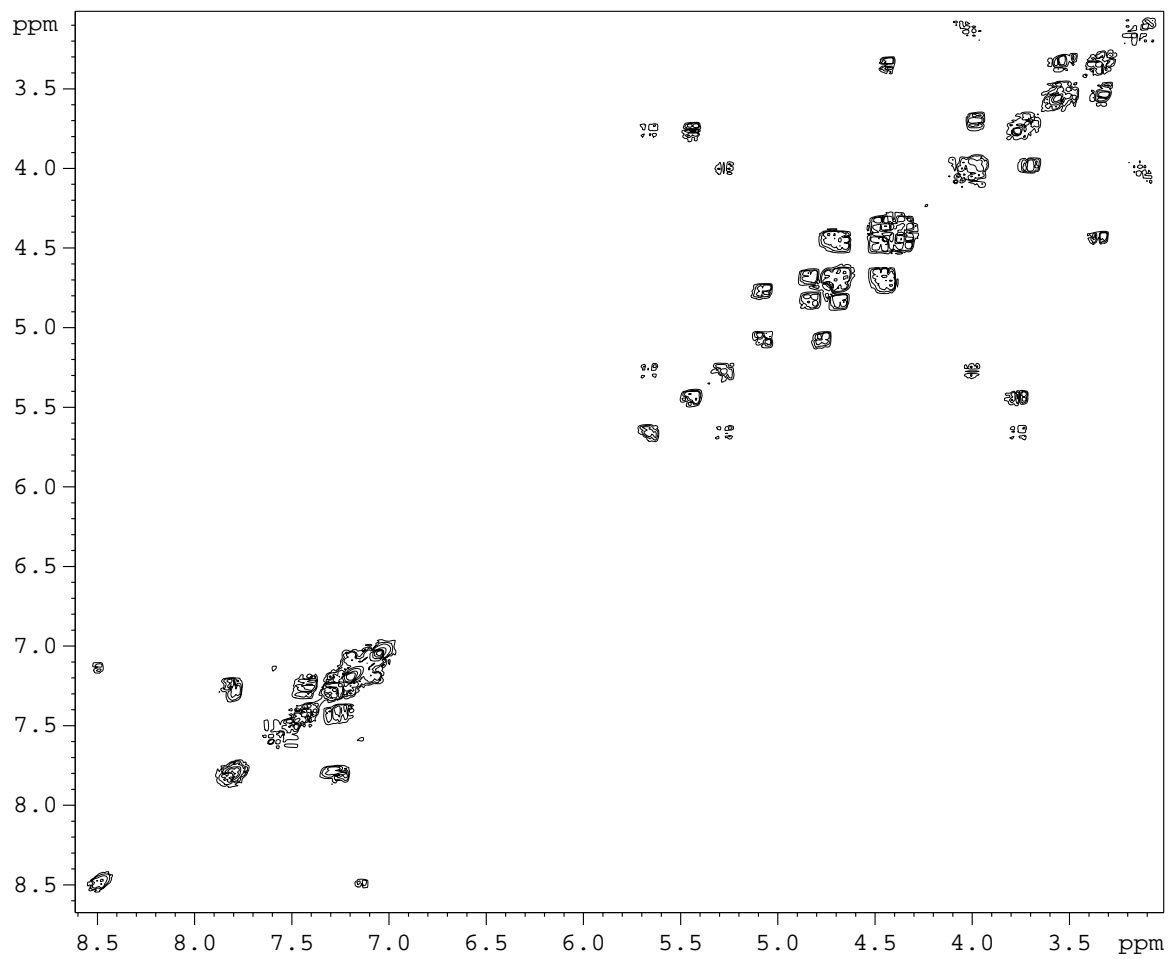

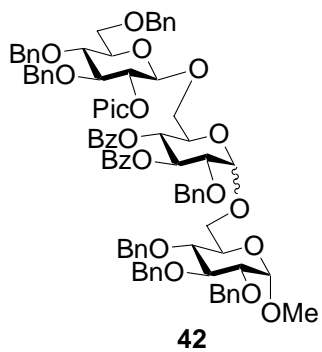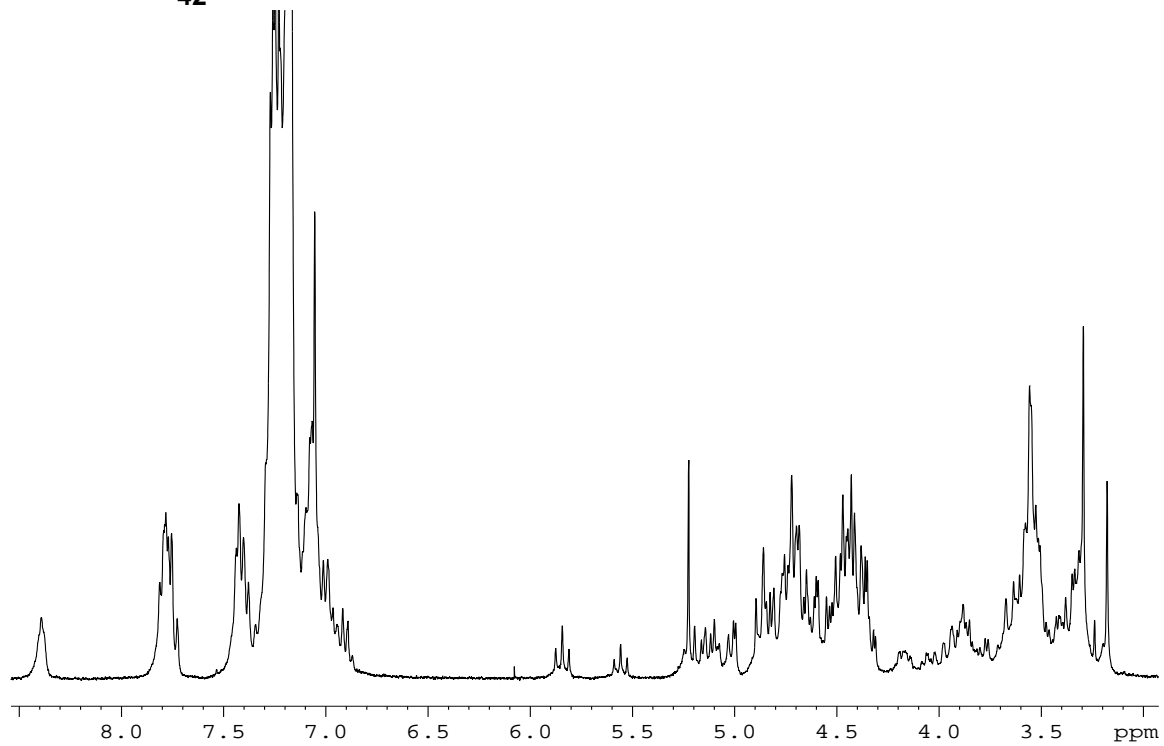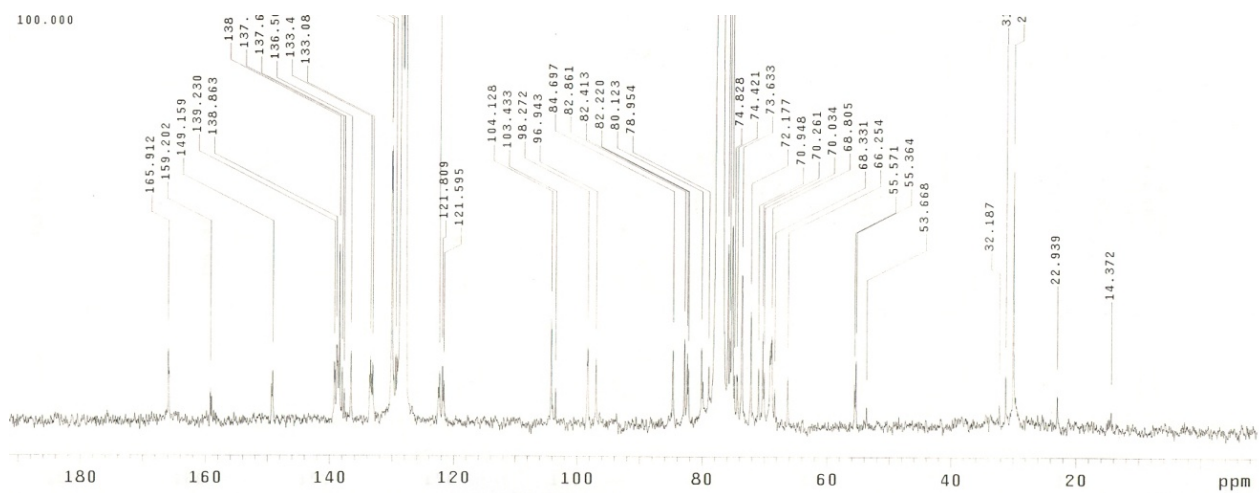

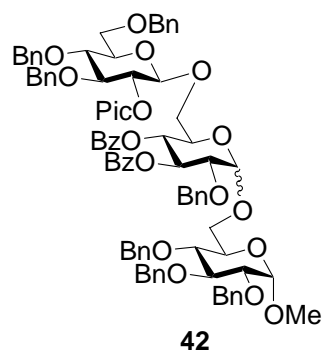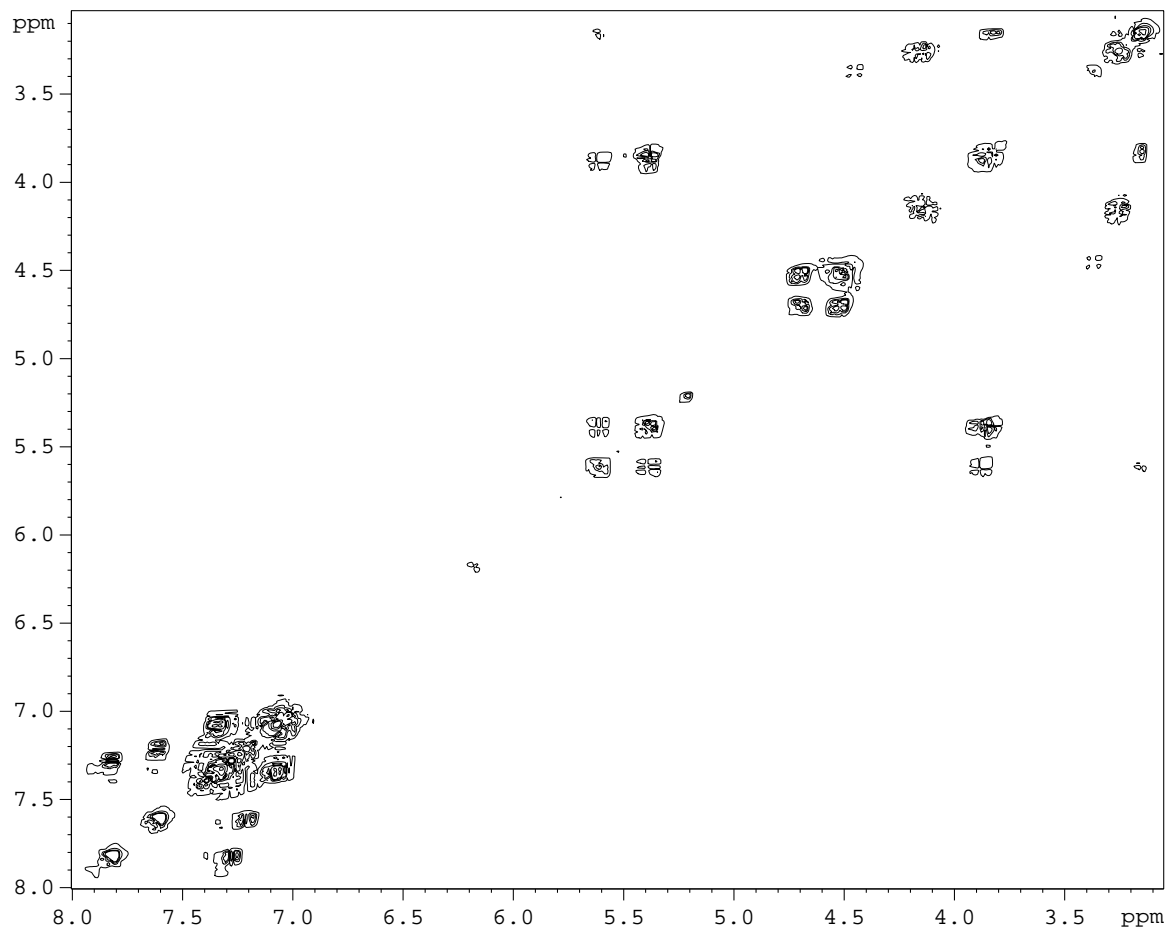

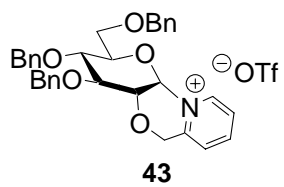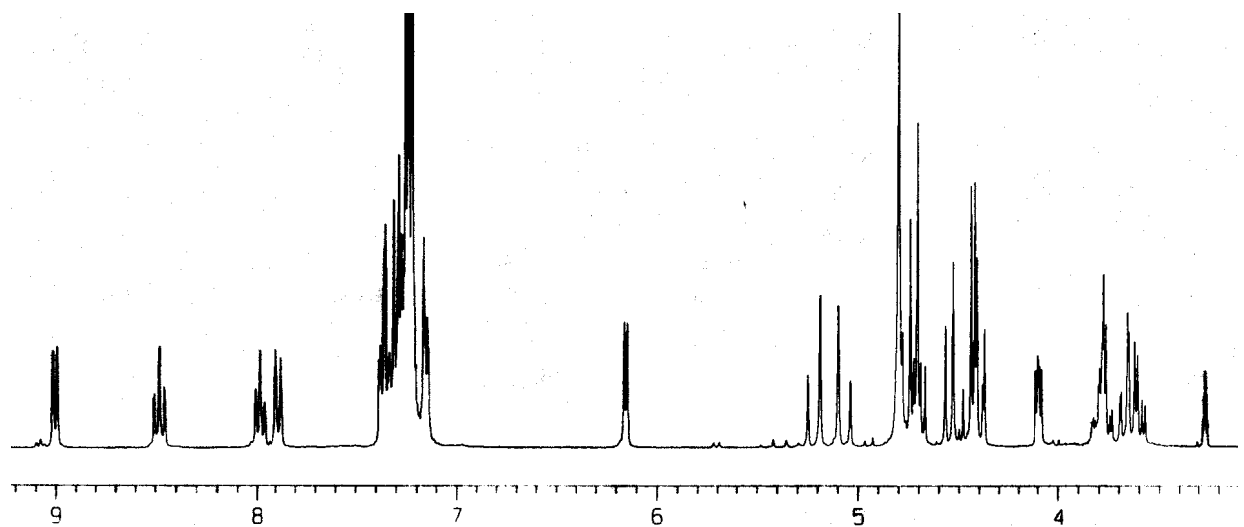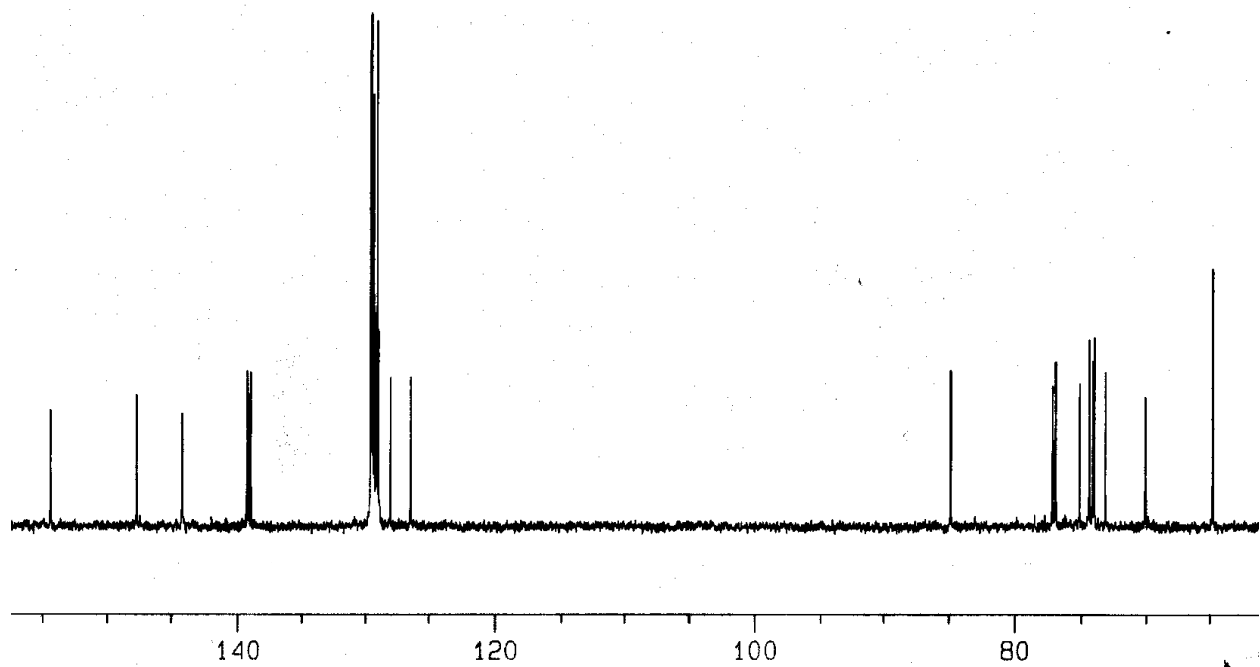



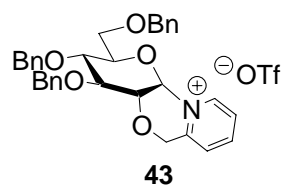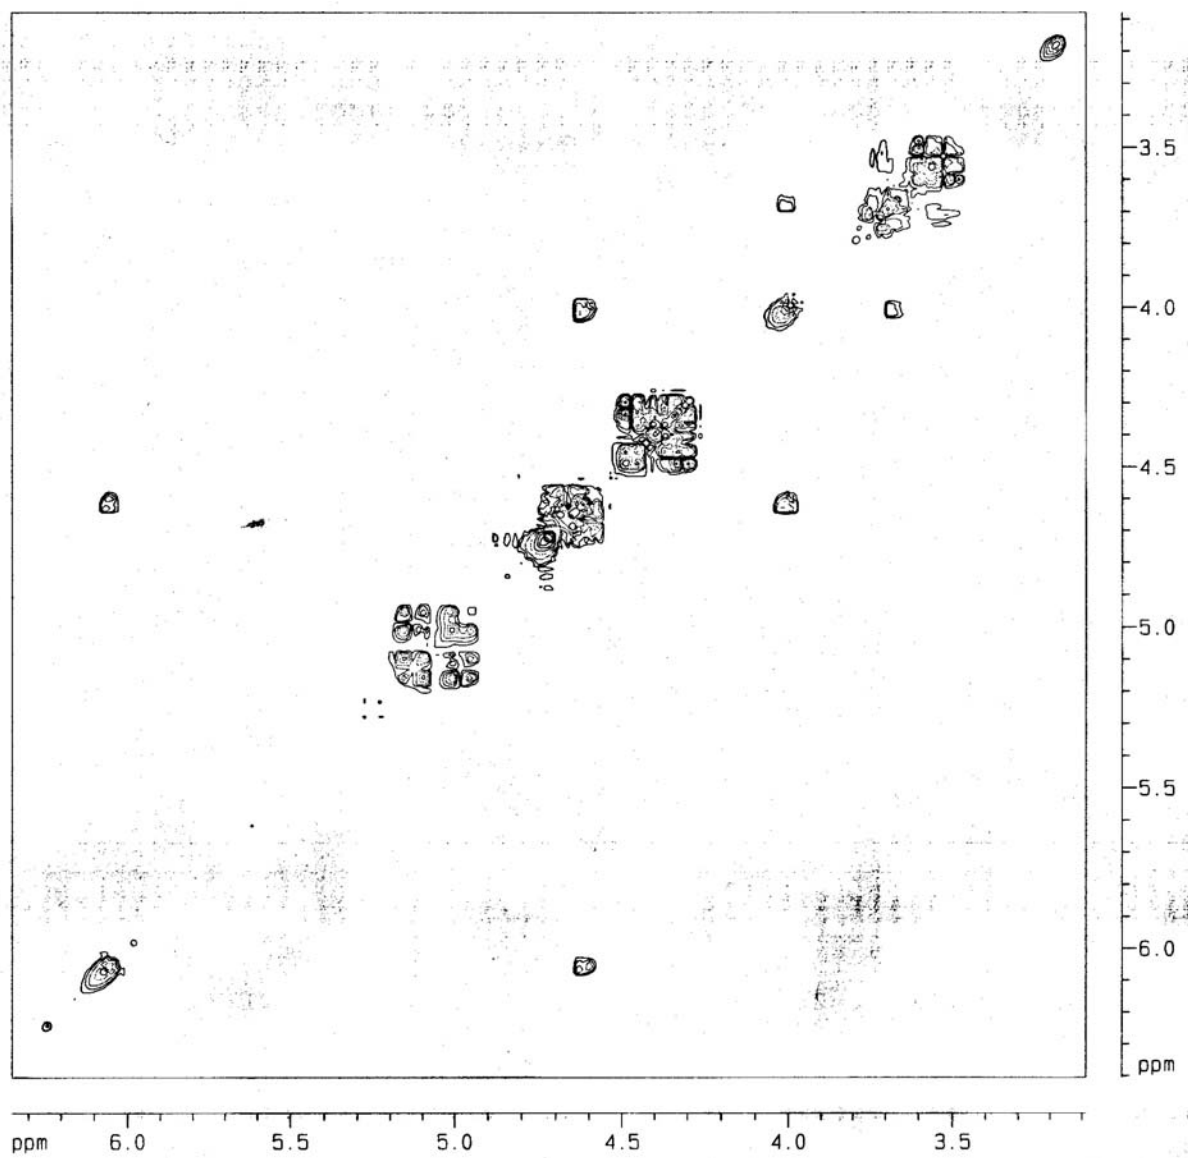

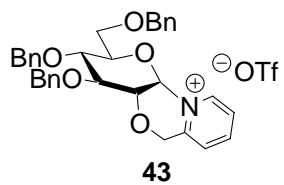

TOCSY

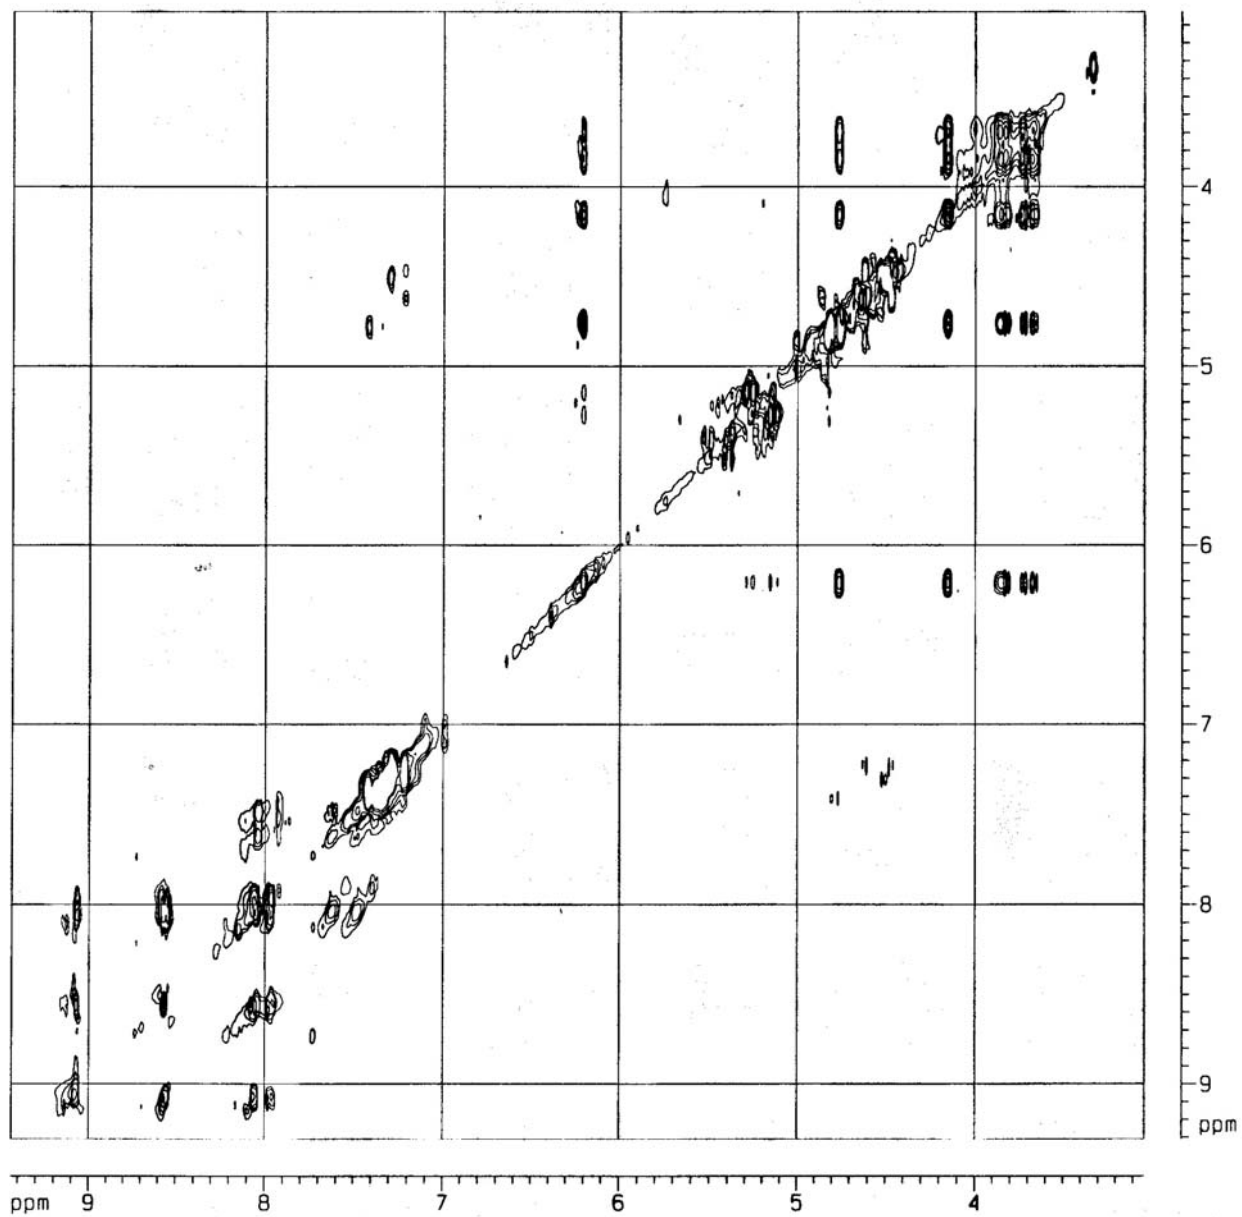

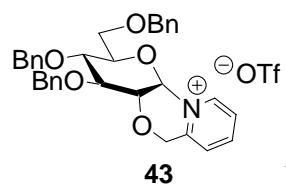

NOESY

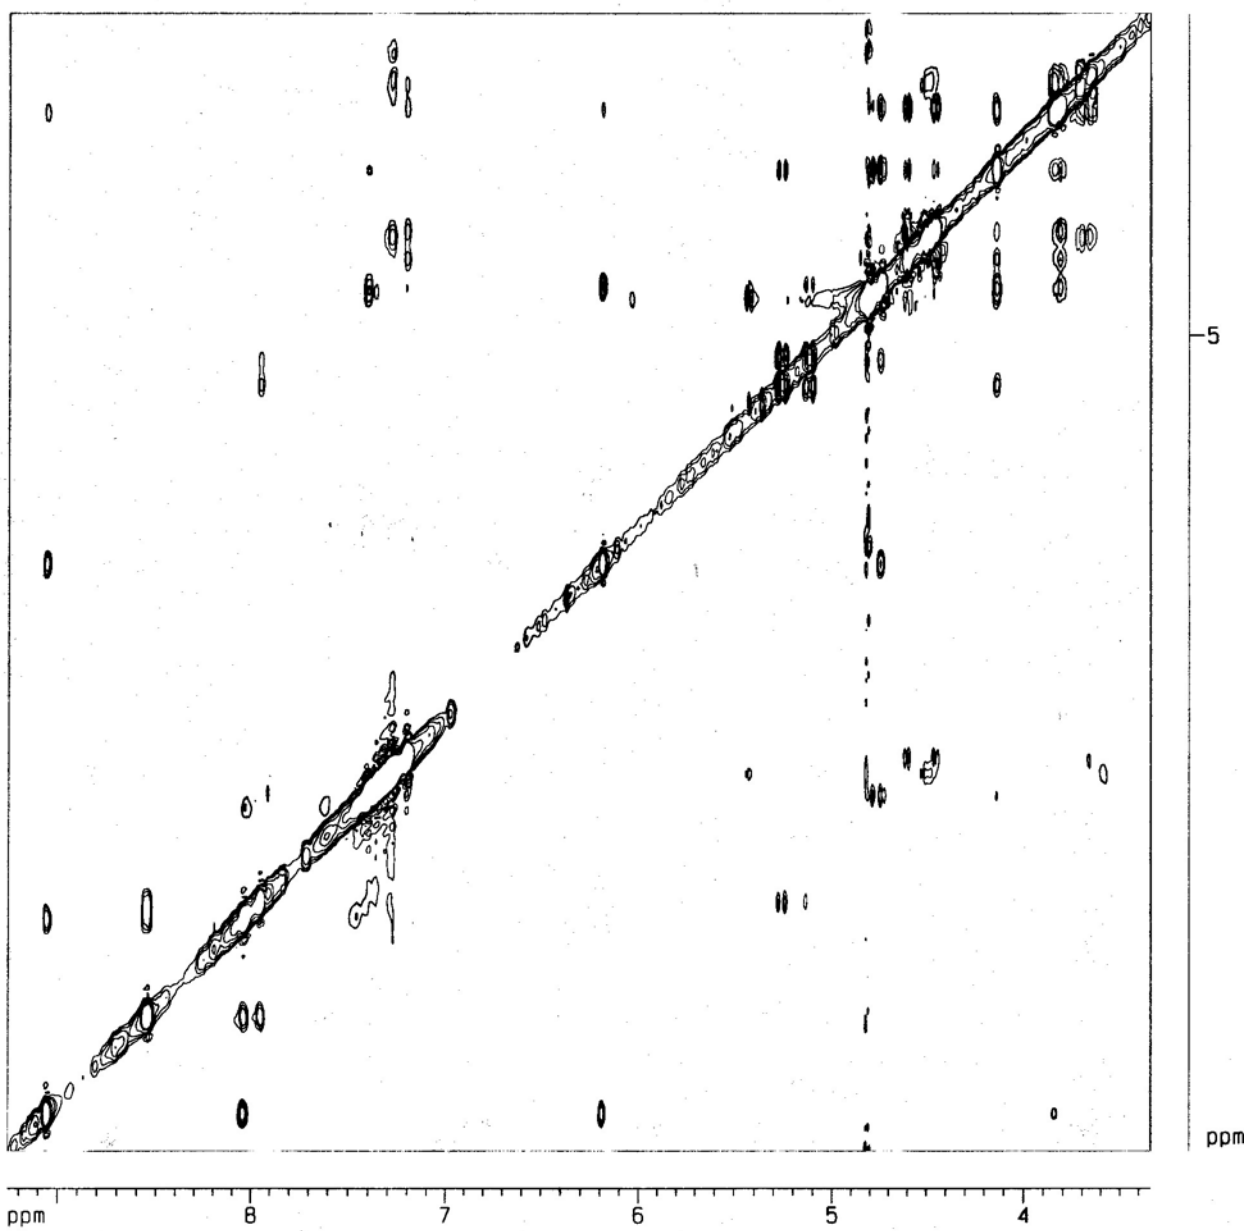

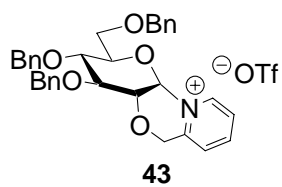

HMBC

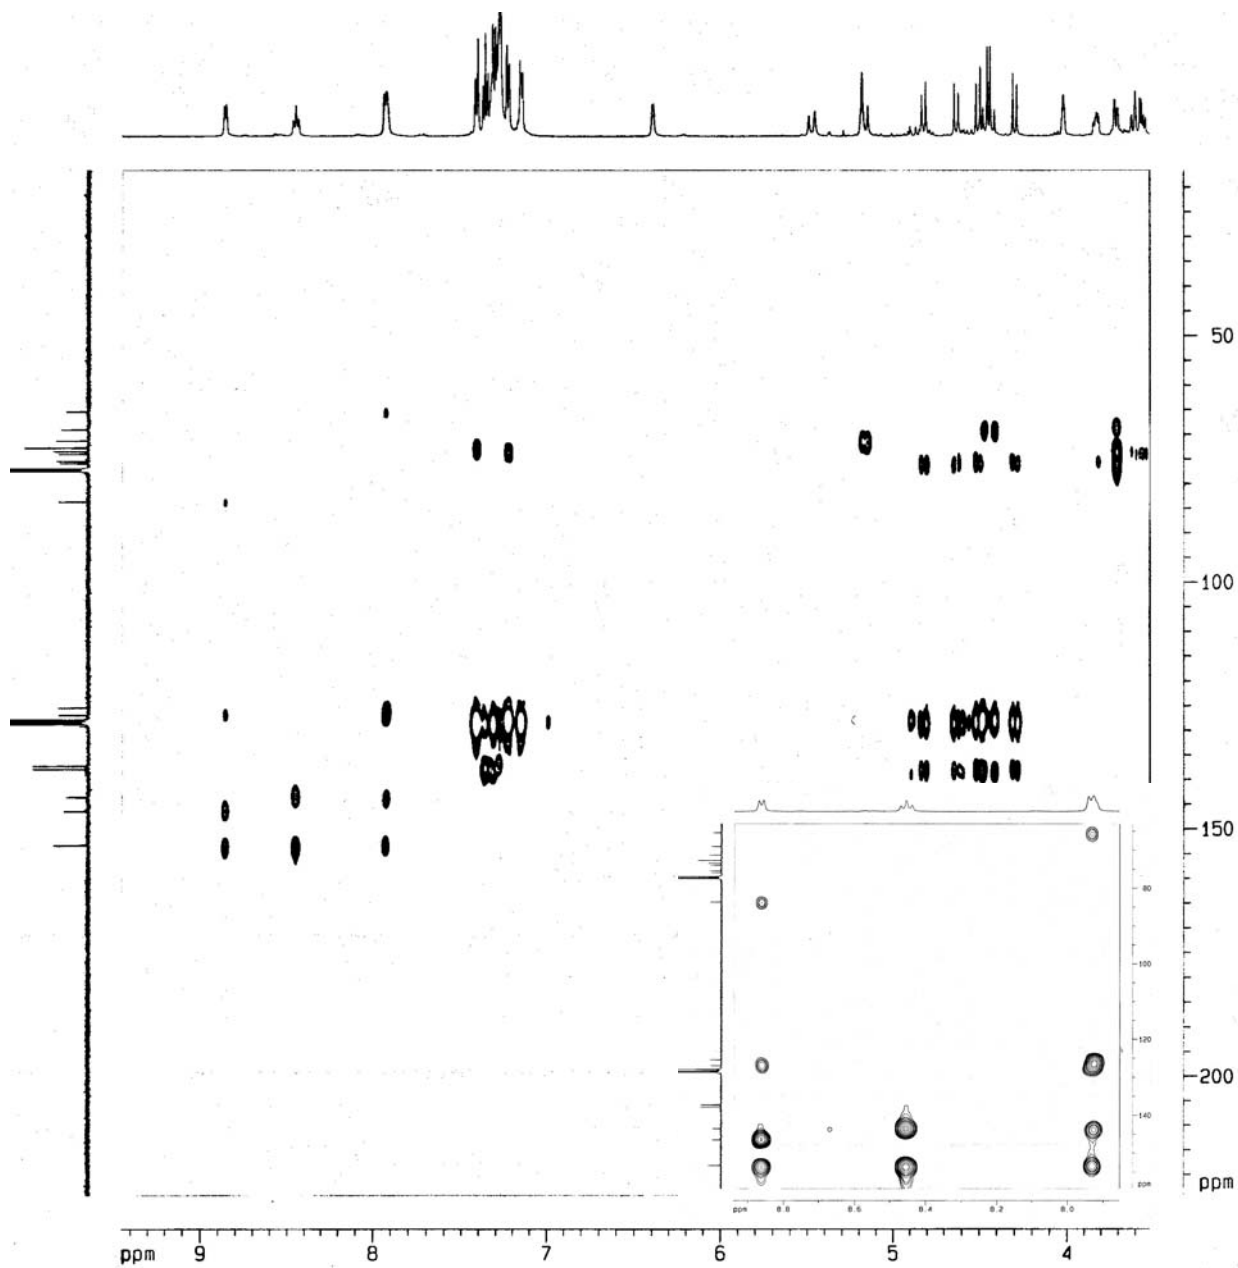

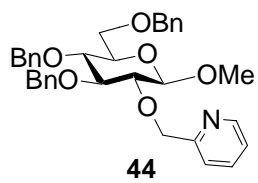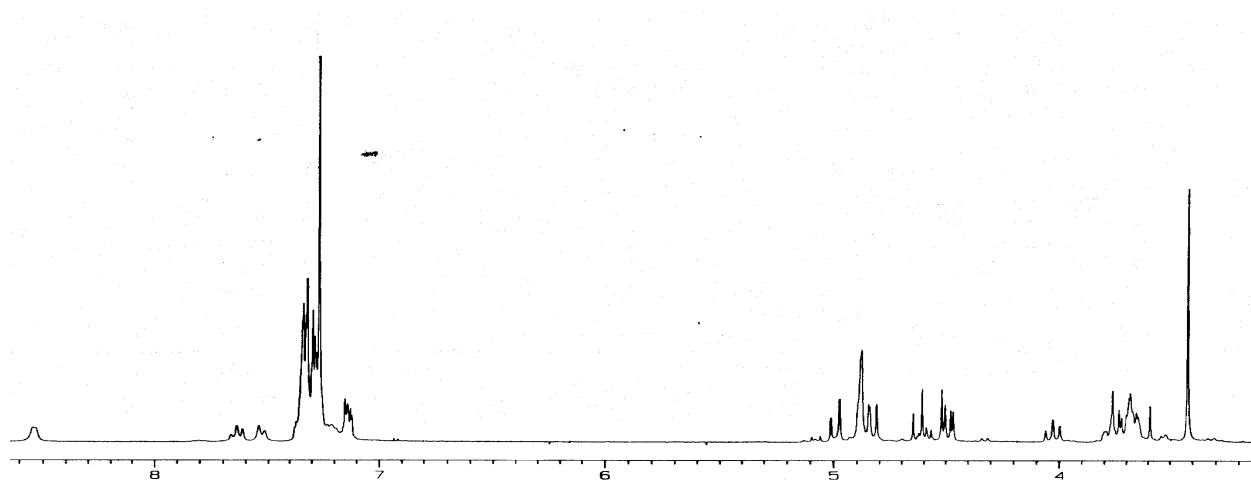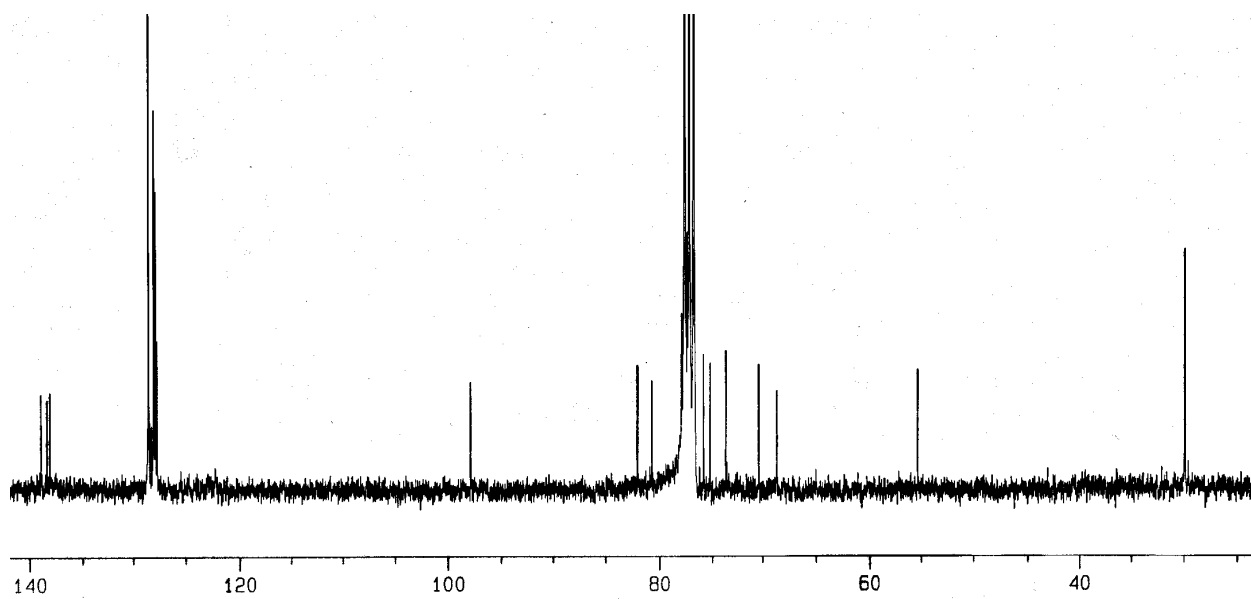

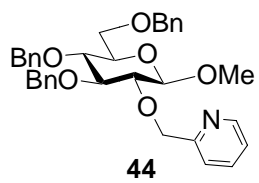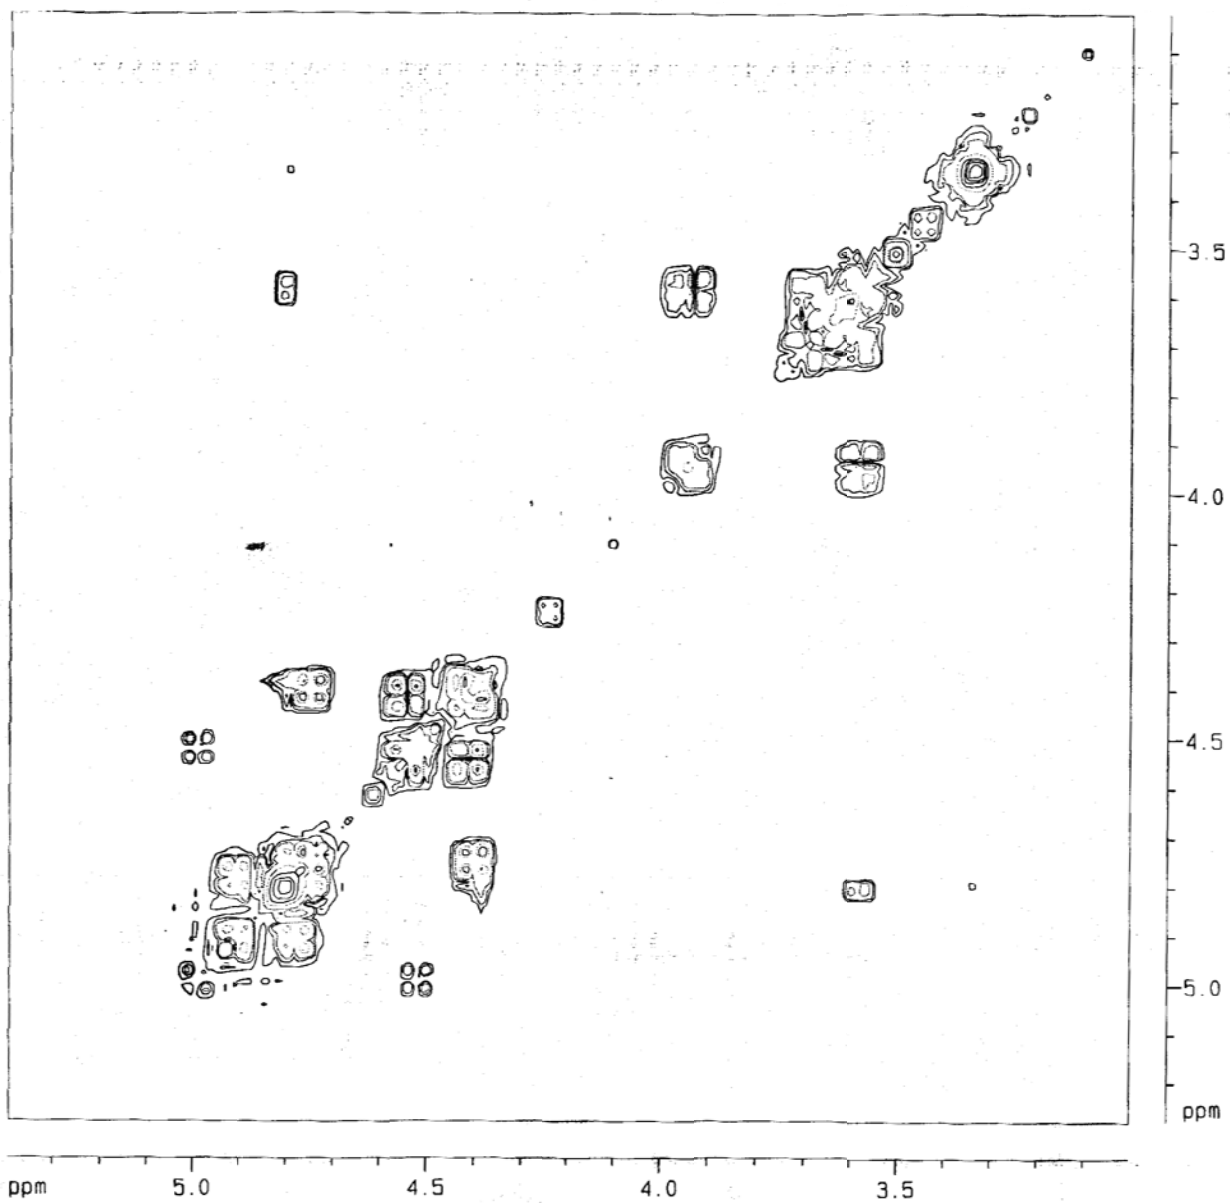

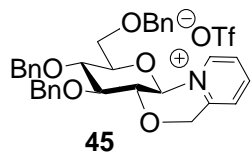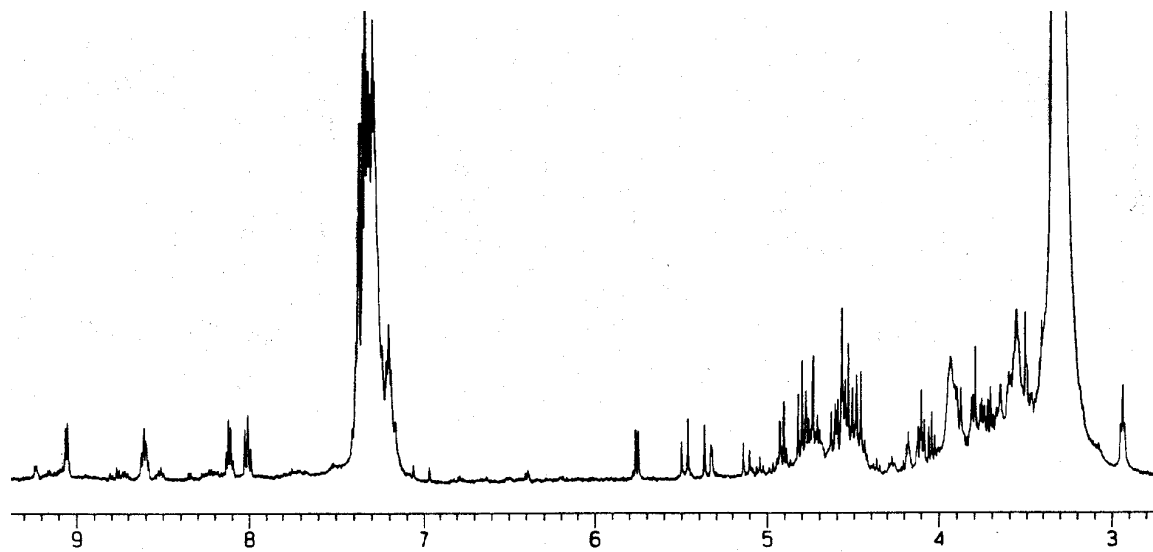

## References

- (1) Thijssen, M. J. L.; Halkes, K. M.; Kamerling, J. P.; Vliegthart, J. F. G. *Bioorg. Med. Chem.* **1994**, *2*, 1309-1317.
- (2) Kochetkov, N. K.; Backinowsky, L. V.; Tsvetkov, Y. E. *Tetrahedron Lett.* **1977**, *41*, 3681-3684.
- (3) Pornsuriyasak, P.; Demchenko, A. V. *Chem. Eur. J.* **2006**, *12*, 6630-6646.
